# Supplementary material for: Who is adapting and how? Identifying actors and roles in climate change adaptation
Source: Research Square preprint supplement (doi:10.21203/rs.3.rs-2406657/v1), 2023-08-14
Supplement: Supplementary file 2 [file fb2277d790c9b5c82b8319e5.xlsx]

## Sheet: ReadMe
Supplementary Material 2
This file contains the following worksheets containing supplementary material for article titled ‘Who is adapting and how? Identifying actors and roles in climate change adaptation’ by Petzold et al.:
Included articles	Contains all articles included from the GAMI database after additional screening for eligibility according to our specific inclusion criteria
Excluded articles	Contains all articles excluded from the GAMI database after additional screening for eligibility according to our specific inclusion criteria, with reasons for exclusions given
22 December 2022
Contact: jan.petzold@lmu.de

## Sheet: Included articles
SysRev ID	GAMI ID	Include	Citation
11159627	6205478	TRUE	Nti, F.K.; Barkley, A., The response to climate variability among farm families in Northern Ghana, Agric. and Trade: Int. Perspect.
11159633	6205479	TRUE	Jemaa, T; Huguenin, J; Moulin, CH; Najar, T, Sheep breeding in Central Tunisia: varied strategies and adaptations to changes in land use, CAHIERS AGRICULTURES
11159637	6205480	TRUE	Saronga, N.J.; Mosha, I.H.; Kessy, A.T.; Ezekiel, M.J.; Zizinga, A.; Kweka, O.; Onyango, P.; Kovats, S., I eat two meals per day impact of climate variability on eating habits among households in rufiji district, tanzania: A qualitative study, Agric. Food Secur.
11159641	6205481	TRUE	Ng'ang'a, SK; Bulte, EH; Giller, KE; Mcintire, JM; Rufino, MC, Migration and Self-Protection Against Climate Change: A Case Study of Samburu County, Kenya, WORLD DEVELOPMENT
11159644	6205482	TRUE	Simatele, D; Simatele, M, Migration as an adaptive strategy to climate variability: a study of the Tonga-speaking people of Southern Zambia, DISASTERS
11159648	6205483	TRUE	Thierfelder, C; Bunderson, WT; Jere, ZD; Mutenje, M; Ngwira, A, DEVELOPMENT OF CONSERVATION AGRICULTURE (CA) SYSTEMS IN MALAWI: LESSONS LEARNED FROM 2005 TO 2014, EXPERIMENTAL AGRICULTURE
11159652	6205484	TRUE	Tambo, JA, Adaptation and resilience to climate change and variability in north-east Ghana, INTERNATIONAL JOURNAL OF DISASTER RISK REDUCTION
11159656	6205486	TRUE	Zorom, M; Barbier, B; Mertz, O; Servat, E, Diversification and adaptation strategies to climate variability: A farm typology for the Sahel, AGRICULTURAL SYSTEMS
11159663	6205487	TRUE	Bryan, E; Ringler, C; Okoba, B; Roncoli, C; Silvestri, S; Herrero, M, Adapting agriculture to climate change in Kenya: Household strategies and determinants, JOURNAL OF ENVIRONMENTAL MANAGEMENT
11159665	6205488	TRUE	Gross-Camp, ND; Few, R; Martin, A, Perceptions of and adaptation to environmental change in forest-adjacent communities in three African nations, INTERNATIONAL FORESTRY REVIEW
11159686	6205489	TRUE	de Jalon, SG; Iglesias, A; Barnes, AP, Drivers of farm-level adaptation to climate change in Africa: an evaluation by a composite index of potential adoption, MITIGATION AND ADAPTATION STRATEGIES FOR GLOBAL CHANGE
11159687	6205490	TRUE	Kassie, BT; Hengsdijk, H; Rotter, R; Kahiluoto, H; Asseng, S; Van Ittersum, M, Adapting to Climate Variability and Change: Experiences from Cereal-Based Farming in the Central Rift and Kobo Valleys, Ethiopia, ENVIRONMENTAL MANAGEMENT
11159688	6205492	TRUE	Muller, C; Shackleton, SE, Perceptions of climate change and barriers to adaptation amongst commonage and commercial livestock farmers in the semi-arid Eastern Cape Karoo, AFRICAN JOURNAL OF RANGE & FORAGE SCIENCE
11159689	6205493	TRUE	Arslan, A; McCarthy, N; Lipper, L; Asfaw, S; Cattaneo, A, Adoption and intensity of adoption of conservation farming practices in Zambia, AGRICULTURE ECOSYSTEMS & ENVIRONMENT
11159690	6205495	TRUE	Andrieu, N; Sogoba, B; Zougmore, R; Howland, F; Samake, O; Bonilla-Findji, O; Lizarazo, M; Nowak, A; Dembele, C; Corner-Dolloff, C, Prioritizing investments for climate-smart agriculture: Lessons learned from Mali, AGRICULTURAL SYSTEMS
11159692	6205497	TRUE	Limantol, AM; Keith, BE; Azabre, BA; Lennartz, B, Farmers' perception and adaptation practice to climate variability and change: a case study of the Vea catchment in Ghana, SPRINGERPLUS
11159693	6205498	TRUE	Antwi-Agyei, P; Dougill, AJ; Stringer, LC, Barriers to climate change adaptation: evidence from northeast Ghana in the context of a systematic literature review, CLIMATE AND DEVELOPMENT
11159695	6205501	TRUE	El Jihad, MD, Climate Change and Rural Development in the Middle Atlas Mountains and Fringe Areas (Morocco), REVUE DE GEOGRAPHIE ALPINE-JOURNAL OF ALPINE RESEARCH
11159726	6205502	TRUE	Zampaligre, N; Dossa, LH; Schlecht, E, Climate change and variability: perception and adaptation strategies of pastoralists and agro-pastoralists across different zones of Burkina Faso, REGIONAL ENVIRONMENTAL CHANGE
11159727	6205503	TRUE	Ziervogel, G; New, M; van Garderen, EA; Midgley, G; Taylor, A; Hamann, R; Stuart-Hill, S; Myers, J; Warburton, M, Climate change impacts and adaptation in South Africa, WILEY INTERDISCIPLINARY REVIEWS-CLIMATE CHANGE
11159729	6205506	TRUE	Mganga, KZ; Musimba, NKR; Nyariki, DM, Combining Sustainable Land Management Technologies to Combat Land Degradation and Improve Rural Livelihoods in Semi-arid Lands in Kenya, ENVIRONMENTAL MANAGEMENT
11159730	6205507	TRUE	Makate, C; Wang, RC; Makate, M; Mango, N, Crop diversification and livelihoods of smallholder farmers in Zimbabwe: adaptive management for environmental change, SPRINGERPLUS
11159731	6205508	TRUE	Islam, MZ; Kolade, O; Kibreab, G, Post-disaster Housing Reconstruction: The Impact of Resourcing in Post-cyclones Sidr and Aila in Bangladesh, JOURNAL OF INTERNATIONAL DEVELOPMENT
11159732	6205509	TRUE	Chan, FKS; Adekola, O; Mitchell, G; Ng, CN; Mcdonald, A, TOWARDS SUSTAINABLE FLOOD RISK MANAGEMENT IN THE CHINESE COASTAL MEGACITIES. A CASE STUDY OF PRACTICE IN THE PEARL RIVER DELTA, IRRIGATION AND DRAINAGE
11159733	6205510	TRUE	Gongbuzeren; Huntsinger, L; Li, WJ, Rebuilding pastoral social-ecological resilience on the Qinghai-Tibetan Plateau in response to changes in policy, economics, and climate, ECOLOGY AND SOCIETY
11159735	6205512	TRUE	Caretta, MA, "Credit plus" microcredit schemes: a key to women's adaptive capacity, CLIMATE AND DEVELOPMENT
11159776	6205513	TRUE	Eakin, H.; Tucker, C.M.; Castellanos, E.; Diaz-Porras, R.; Barrera, J.F.; Morales, H., Adaptation in a multi-stressor environment: Perceptions and responses to climatic and economic risks by coffee growers in Mesoamerica, Environ. Dev. Sustainability
11159777	6205514	TRUE	Huang-Lachmann, JT; Lovett, JC, How cities prepare for climate change: Comparing Hamburg and Rotterdam, CITIES
11159778	6205515	TRUE	Caparros-Midwood, D; Barr, S; Dawson, R, Spatial Optimization of Future Urban Development with Regards to Climate Risk and Sustainability Objectives, RISK ANALYSIS
11159779	6205517	TRUE	Barbosa, R; Vicente, R; Santos, R, Climate change and thermal comfort in Southern Europe housing: A case study from Lisbon, BUILDING AND ENVIRONMENT
11159780	6205518	TRUE	Newsham, A; Pulido, MT; Ulrichs, M; Cruz, RM; Ocon, XC; Shankland, A; Cannon, T, Ecosystems-based adaptation: Are we being conned? Evidence from Mexico, GLOBAL ENVIRONMENTAL CHANGE-HUMAN AND POLICY DIMENSIONS
11159781	6205519	TRUE	Lamborn, CC; Smith, JW, Human perceptions of, and adaptations to, shifting runoff cycles: A case-study of the Yellowstone River (Montana, USA), FISHERIES RESEARCH
11159782	6205524	TRUE	Kimaro, AA; Mpanda, M; Rioux, J; Aynekulu, E; Shaba, S; Thiong'o, M; Mutuo, P; Abwanda, S; Shepherd, K; Neufeldt, H; Rosenstock, TS, Is conservation agriculture 'climate-smart' for maize farmers in the highlands of Tanzania?, NUTRIENT CYCLING IN AGROECOSYSTEMS
11159783	6205525	TRUE	Derbile, EK, Reducing vulnerability of rain-fed agriculture to drought through indigenous knowledge systems in north-eastern Ghana, INTERNATIONAL JOURNAL OF CLIMATE CHANGE STRATEGIES AND MANAGEMENT
11159784	6205526	TRUE	Thierfelder, C; Matemba-Mutasa, R; Rusinamhodzi, L, Yield response of maize (Zea mays L.) to conservation agriculture cropping system in Southern Africa, SOIL & TILLAGE RESEARCH
11159785	6205528	TRUE	Coulibaly, JY; Gbetibouo, GA; Sileshi, GW; Kundhlande, G; Beedy, TL, Responding to Crop Failure: Understanding Farmers' Coping Strategies in Southern Malawi, SUSTAINABILITY
11159796	6205529	TRUE	Musinguzi, L; Efitre, J; Odongkara, K; Ogutu-Ohwayo, R; Muyodi, F; Natugonza, V; Olokotum, M; Namboowa, S; Naigaga, S, Fishers' perceptions of climate change, impacts on their livelihoods and adaptation strategies in environmental change hotspots: a case of Lake Wamala, Uganda, ENVIRONMENT DEVELOPMENT AND SUSTAINABILITY
11159797	6205530	TRUE	Fisher, M; Carr, ER, The influence of gendered roles and responsibilities on the adoption of technologies that mitigate drought risk: The case of drought-tolerant maize seed in eastern Uganda, GLOBAL ENVIRONMENTAL CHANGE-HUMAN AND POLICY DIMENSIONS
11159799	6205532	TRUE	Holler, J, Is Sustainable Adaptation Possible? Determinants of Adaptation on Mount Kilimanjaro, PROFESSIONAL GEOGRAPHER
11159800	6205533	TRUE	Wood, BT; Quinn, CH; Stringer, LC; Dougill, AJ, Investigating Climate Compatible Development Outcomes and their Implications for Distributive Justice: Evidence from Malawi, ENVIRONMENTAL MANAGEMENT
11159803	6205536	TRUE	Kgosikoma, O.E.; Batisani, N., Livestock population dynamics and pastoral communities' adaptation to rainfall variability in communal lands of Kgalagadi South, Botswana, Pastoralism
11159836	6205539	TRUE	Lebel, P; Whangchai, N; Chitmanat, C; Lebel, L, Climate risk management in river-based tilapia cage culture in northern Thailand, INTERNATIONAL JOURNAL OF CLIMATE CHANGE STRATEGIES AND MANAGEMENT
11159837	6205540	TRUE	Harvey, CA; Martinez-Rodriguez, MR; Cardenas, JM; Avelino, J; Rapidel, B; Vignola, R; Donatti, CI; Vilchez-Mendoza, S, The use of Ecosystem-based Adaptation practices by smallholder farmers in Central America, AGRICULTURE ECOSYSTEMS & ENVIRONMENT
11159838	6205541	TRUE	Gaget, E; Galewski, T; Jiguet, F; Le Viol, I, Waterbird communities adjust to climate warming according to conservation policy and species protection status, BIOLOGICAL CONSERVATION
11159839	6205542	TRUE	Egbinola, CN; Olaniran, HD; Amanambu, AC, Flood management in cities of developing countries: the example of Ibadan, Nigeria, JOURNAL OF FLOOD RISK MANAGEMENT
11159840	6205544	TRUE	Spekker, H; Heskamp, J, Flood protection for the City of Beira: An exemplary climate adaptation project in Mozambique, BAUTECHNIK
11159841	6205545	TRUE	Warner, K; Afifi, T, Where the rain falls: Evidence from 8 countries on how vulnerable households use migration to manage the risk of rainfall variability and food insecurity, CLIMATE AND DEVELOPMENT
11159842	6205547	TRUE	Sanchez, A; Izzo, M, Micro hydropower: an alternative for climate change mitigation, adaptation, and development of marginalized local communities in Hispaniola Island, CLIMATIC CHANGE
11159843	6205548	TRUE	Boelee, E; Yohannes, M; Poda, JN; McCartney, M; Cecchi, P; Kibret, S; Hagos, F; Laamrani, H, Options for water storage and rainwater harvesting to improve health and resilience against climate change in Africa, REGIONAL ENVIRONMENTAL CHANGE
11159844	6214200	TRUE	Weldegebriel, ZB; Prowse, M, Climate-Change Adaptation in Ethiopia: To What Extent Does Social Protection Influence Livelihood Diversification?, DEVELOPMENT POLICY REVIEW
11159845	6214201	TRUE	Abass, R.; Mensah, A.; Fosu-Mensah, B., The role of formal and informal institutions in smallholder agricultural adaptation: The case of lawra and nandom districts, Ghana,
11159866	6214202	TRUE	Pauw, P, The role of perception in subsistence farmer adaptation in Africa Enriching the climate finance debate, INTERNATIONAL JOURNAL OF CLIMATE CHANGE STRATEGIES AND MANAGEMENT
11159867	6214203	TRUE	Cooper, SJ; Wheeler, T, Rural household vulnerability to climate risk in Uganda, REGIONAL ENVIRONMENTAL CHANGE
11159868	6214204	TRUE	Brottem, L; Brooks, B, Crops and livestock under the sun: Obstacles to rural livelihood adaptations to hotter 21st century temperatures in eastern Senegal, LAND DEGRADATION & DEVELOPMENT
11159869	6214205	TRUE	Antwi-Agyei, P; Dougill, AJ; Stringer, LC; Codjoe, SNA, Adaptation opportunities and maladaptive outcomes in climate vulnerability hotspots of northern Ghana, CLIMATE RISK MANAGEMENT
11159870	6214206	TRUE	Opare, S, Adaptation to climate change impacts: coping strategies of an indigenous community in Ghana to declining water supply, CLIMATE AND DEVELOPMENT
11159871	6214207	TRUE	Ndamani, F; Watanabe, T, Determinants of farmers' adaptation to climate change: A micro level analysis in Ghana, SCIENTIA AGRICOLA
11159872	6214208	TRUE	Ahmed, A; Lawson, ET; Mensah, A; Gordon, C; Padgham, J, Adaptation to climate change or non-climatic stressors in semi-arid regions? Evidence of gender differentiation in three agrarian districts of Ghana, ENVIRONMENTAL DEVELOPMENT
11159873	6214209	TRUE	Paul, CJ; Weinthal, E, The development of Ethiopia's Climate Resilient Green Economy 2011-2014: implications for rural adaptation, CLIMATE AND DEVELOPMENT
11159874	6214210	TRUE	Asfaw, S; Pallante, G; Palma, A, Diversification Strategies and Adaptation Deficit: Evidence from Rural Communities in Niger, WORLD DEVELOPMENT
11159875	6214211	TRUE	Atsiaya, GO; Ayuya, OI; Nakhone, LW; Lagat, JK, Drivers and responses to climate variability by agro-pastoralists in Kenya: the case of Laikipia County, SN APPLIED SCIENCES
11159896	6214212	TRUE	Motsltolaplte, M.R.; Kgathi, D.L.; Vanderpost, C., Rural livelihoods and household adaptation to extreme flooding in the Okavango Delta, Botswana, Flooding: Risk Factors, Environ. Impacts and Manag. Strateg.
11159897	6214214	TRUE	Chakwizira, J, Rural transport and climate change in South Africa: Converting constraints into rural transport adaptation opportunities, JAMBA-JOURNAL OF DISASTER RISK STUDIES
11159898	6214215	TRUE	Jokisch, A; Urban, W; Kluge, T, Small Scale Rain- and Floodwater Harvesting for Horticulture in Central-Northern Namibia for Livelihood Improvement and as an Adaptation Strategy to Climate Change, IMPLEMENTING CLIMATE CHANGE ADAPTATION IN CITIES AND COMMUNITIES: INTEGRATING STRATEGIES AND EDUCATIONAL APPROACHES
11159899	6214216	TRUE	Rademacher-Schulz, C; Schraven, B; Mahama, ES, Time matters: shifting seasonal migration in Northern Ghana in response to rainfall variability and food insecurity, CLIMATE AND DEVELOPMENT
11159900	6214217	TRUE	Kamara, JK; Agho, K; Renzaho, AMN, Understanding disaster resilience in communities affected by recurrent drought in Lesotho and Swaziland-A qualitative study, PLOS ONE
11159901	6214218	TRUE	Chisadza, B; Tumbare, MJ; Nhapi, I; Nyabeze, WR, Useful traditional knowledge indicators for drought forecasting in the Mzingwane Catchment area of Zimbabwe, DISASTER PREVENTION AND MANAGEMENT
11159903	6214220	TRUE	Ombogoh, DB; Tanui, J; McMullin, S; Muriuki, J; Mowo, J, Enhancing adaptation to climate variability in the East African highlands: a case for fostering collective action among smallholder farmers in Kenya and Uganda, CLIMATE AND DEVELOPMENT
11159904	6214221	TRUE	Apraku, A; Akpan, W; Moyo, P, Indigenous Knowledge, Global Ignorance? Insights from an Eastern Cape Climate Change Study, SOUTH AFRICAN REVIEW OF SOCIOLOGY
11159905	6214222	TRUE	Yang, J; Owusu, V; Andriesse, E; Ablo, AD, In-Situ Adaptation and Coastal Vulnerabilities in Ghana and Tanzania, JOURNAL OF ENVIRONMENT & DEVELOPMENT
11159936	6214224	TRUE	Sutcliffe, C; Dougill, AJ; Quinn, CH, Evidence and perceptions of rainfall change in Malawi: Do maize cultivar choices enhance climate change adaptation in sub-Saharan Africa?, REGIONAL ENVIRONMENTAL CHANGE
11159937	6214225	TRUE	Mutandwa, E; Hanyani-Mlambo, B; Manzvera, J, Exploring the link between climate change perceptions and adaptation strategies among smallholder farmers in Chimanimani district of Zimbabwe, INTERNATIONAL JOURNAL OF SOCIAL ECONOMICS
11159938	6214226	TRUE	Njeru, PNM; Mugwe, J; Maina, I; Mucheru-Muna, M; Mugendi, D; Lekasi, JK; Kimani, SK; Miriti, J; Oeba, VO; Esilaba, AO; Mutuma, E; Rao, KPC; Muriithi, F, Integrating Farmers and Scientific Methods for Evaluating Climate Change Adaptation Options in Embu County, ADAPTING AFRICAN AGRICULTURE TO CLIMATE CHANGE: TRANSFORMING RURAL LIVELIHOODS
11159939	6214227	TRUE	Mersha, AA; van Laerhoven, F, The interplay between planned and autonomous adaptation in response to climate change: Insights from rural Ethiopia, WORLD DEVELOPMENT
11159940	6214228	TRUE	Boansi, D; Tambo, JA; Muller, M, Intra-seasonal risk of agriculturally-relevant weather extremes in West African Sudan Savanna, THEORETICAL AND APPLIED CLIMATOLOGY
11159941	6214229	TRUE	Obayelu, OA; Adepoju, AO; Idowu, T, Factors influencing farmers' choices of adaptation to climate change in Ekiti State, Nigeria, JOURNAL OF AGRICULTURE AND ENVIRONMENT FOR INTERNATIONAL DEVELOPMENT
11159942	6214230	TRUE	Ng'ang'a, SK; Bulte, EH; Giller, KE; Ndiwa, NN; Kifugo, SC; McIntire, JM; Herrero, M; Rufino, MC, Livestock wealth and social capital as insurance against climate risk: A case study of Samburu County in Kenya, AGRICULTURAL SYSTEMS
11159943	6214231	TRUE	Kloos, J; Renaud, FG, Organic cotton production as an adaptation option in north-west Benin, OUTLOOK ON AGRICULTURE
11159944	6214232	TRUE	Twongyirwe, R; Mfitumukiza, D; Barasa, B; Naggayi, BR; Odongo, H; Nyakato, V; Mutoni, G, Perceived effects of drought on household food security in South-western Uganda: Coping responses and determinants, WEATHER AND CLIMATE EXTREMES
11159945	6214233	TRUE	Ochieng, J; Kirimi, L; Makau, J, Adapting to climate variability and change in rural Kenya: farmer perceptions, strategies and climate trends, NATURAL RESOURCES FORUM
11159996	6214234	TRUE	Kima, SA; Okhimamhe, AA; Kiema, A; Zampaligre, N; Sule, I, Adapting to the impacts of climate change in the sub-humid zone of Burkina Faso, West Africa: Perceptions of agro-pastoralists, PASTORALISM-RESEARCH POLICY AND PRACTICE
11159997	6214235	TRUE	Bedeke, S; Vanhove, W; Gezahegn, M; Natarajan, K; Van Damme, P, Adoption of climate change adaptation strategies by maize-dependent smallholders in Ethiopia, NJAS-WAGENINGEN JOURNAL OF LIFE SCIENCES
11159999	6214237	TRUE	Denkyirah, EK; Okoffo, ED; Adu, DT; Bosompem, OA, What are the drivers of cocoa farmers' choice of climate change adaptation strategies in Ghana?, COGENT FOOD & AGRICULTURE
11160000	6214238	TRUE	Pauline, NM; Grab, S, Whose knowledge matters in climate change adaptation? Perceived and measured rainfall trends during the last half century in south-western Tanzania, SINGAPORE JOURNAL OF TROPICAL GEOGRAPHY
11160001	6214239	TRUE	Dube, T.; Mlilo, C.; Moyo, P.; Ncube, C.; Phiri, K., Will adaptation carry the future? Questioning the long-term capacity of smallholder farmers' adaptation strategies against climate change in Gwanda District, Zimbabwe, Journal of Human Ecology
11160002	6214240	TRUE	Kidane, R; Prowse, M; de Neergaard, A, Bespoke Adaptation in Rural Africa? An Asset-Based Approach from Southern Ethiopia, EUROPEAN JOURNAL OF DEVELOPMENT RESEARCH
11160004	6214242	TRUE	Muricho, DN; Otieno, DJ; Oluoch-Kosura, W; Jirstrom, M, Building pastoralists' resilience to shocks for sustainable disaster risk mitigation: Lessons from West Pokot County, Kenya, INTERNATIONAL JOURNAL OF DISASTER RISK REDUCTION
11160005	6214243	TRUE	Gezie, M, Farmer's response to climate change and variability in Ethiopia: A review, COGENT FOOD & AGRICULTURE
11160086	6214244	TRUE	Balama, C; Augustino, S; Eriksen, S; Makonda, FBS, Forest adjacent households' voices on their perceptions and adaptation strategies to climate change in Kilombero District, Tanzania, SPRINGERPLUS
11160087	6214246	TRUE	Ntihinyurwa, PD; de Vries, WT; Chigbu, UE; Dukwiyimpuhwe, PA, The positive impacts of farm land fragmentation in Rwanda, LAND USE POLICY
11160088	6214247	TRUE	Sullivan-Wiley, KA; Gianotti, AGS, Pursuing productivity gains and risk reduction in a multi-hazard landscape: A case study from eastern Uganda, LAND USE POLICY
11160089	6214248	TRUE	Salat, M; Swallow, B, Resource Use Efficiency as a Climate Smart Approach: Case of Smallholder Maize Farmers in Nyando, Kenya, ENVIRONMENTS
11160090	6214249	TRUE	Tarfa, PY; Ayuba, HK; Onyeneke, RU; Idris, N; Nwajiuba, CA; Igberi, CO, CLIMATE CHANGE PERCEPTION AND ADAPTATION IN NIGERIA'S GUINEA SAVANNA: EMPIRICAL EVIDENCE FROM FARMERS IN NASARAWA STATE, NIGERIA, APPLIED ECOLOGY AND ENVIRONMENTAL RESEARCH
11160091	6214250	TRUE	Soglo, YY; Nonvide, GMA, Climate change perceptions and responsive strategies in Benin: the case of maize farmers, CLIMATIC CHANGE
11160092	6214251	TRUE	Mubiru, DN; Radeny, M; Kyazze, FB; Zziwa, A; Lwasa, J; Kinyangi, J; Mungai, C, Climate trends, risks and coping strategies in smallholder farming systems in Uganda, CLIMATE RISK MANAGEMENT
11160093	6214254	TRUE	Karim, MR; Thiel, A, Role of community based local institution for climate change adaptation in the Teesta riverine area of Bangladesh, CLIMATE RISK MANAGEMENT
11160094	6214255	TRUE	Patnaik, U; Das, PK, Do Development Interventions Confer Adaptive Capacity? Insights from Rural India, WORLD DEVELOPMENT
11160136	6214257	TRUE	Tauhid, FA; Zawani, H, Mitigating Climate Change Related Floods in Urban Poor Areas: Green Infrastructure Approach, JOURNAL OF REGIONAL AND CITY PLANNING
11160137	6214258	TRUE	Hlahla, S; Hill, TR, Responses to Climate Variability in Urban Poor Communities in Pietermaritzburg, KwaZulu-Natal, South Africa, SAGE OPEN
11160138	6214260	TRUE	Udelsmann Rodrigues, C., Climate change and DIY urbanism in Luanda and Maputo: new urban strategies?,
11160139	6214262	TRUE	van Hooff, T; Blocken, B; Hensen, JLM; Timmermans, HJP, On the predicted effectiveness of climate adaptation measures for residential buildings (Reprinted from vol 82, pg 300-316, 2014), BUILDING AND ENVIRONMENT
11160140	6214263	TRUE	Leal, W; Balogun, AL; Ayal, DY; Bethurem, EM; Murambadoro, M; Mambo, J; Taddese, H; Tefera, GW; Nagy, GJ; Fudjumdjum, H; Mugabe, P, Strengthening climate change adaptation capacity in Africa-case studies from six major African cities and policy implications, ENVIRONMENTAL SCIENCE & POLICY
11160141	6214268	TRUE	Boezeman, D.; de Vries, T., Climate proofing social housing in the Netherlands: toward mainstreaming?, J. Environ. Plann. Manage.
11160142	6216006	TRUE	McKune, S; Poulsen, L; Russo, S; Devereux, T; Faas, S; McOmber, C; Ryley, T, Reaching the end goal: Do interventions to improve climate information services lead to greater food security?, CLIMATE RISK MANAGEMENT
11160143	6216010	TRUE	Holden, ST; Fisher, M, Subsidies promote use of drought tolerant maize varieties despite variable yield performance under smallholder environments in Malawi, FOOD SECURITY
11160145	6216013	TRUE	Macholdt, J; Honermeier, B, Impact of Climate Change on Cultivar Choice: Adaptation Strategies of Farmers and Advisors in German Cereal Production, AGRONOMY-BASEL
11160166	6216014	TRUE	Handschuch, C; Wollni, M, Improved production systems for traditional food crops: the case of finger millet in western Kenya, FOOD SECURITY
11160167	6216015	TRUE	Ng'ang'a, SK; Van Wijk, MT; Rufino, MC; Giller, KE, Adaptation of agriculture to climate change in semi-arid Borena, Ethiopia, REGIONAL ENVIRONMENTAL CHANGE
11160168	6216017	TRUE	Wossen, T; Abdoulaye, T; Alene, A; Feleke, S; Menkir, A; Manyong, V, Measuring the impacts of adaptation strategies to drought stress: The case of drought tolerant maize varieties, JOURNAL OF ENVIRONMENTAL MANAGEMENT
11160169	6216019	TRUE	Elum, ZA; Nhamo, G; Antwi, MA, Effects of climate variability and insurance adoption on crop production in select provinces of South Africa, JOURNAL OF WATER AND CLIMATE CHANGE
11160170	6216022	TRUE	Maxwell, D; Majid, N; Adan, G; Abdirahman, K; Kim, JJ, Facing famine: Somali experiences in the famine of 2011, FOOD POLICY
11160171	6216024	TRUE	Amadu, F.O.; Miller, D.C.; McNamara, P.E., Agroforestry as a pathway to agricultural yield impacts in climate-smart agriculture investments: Evidence from southern Malawi,
11160172	6216026	TRUE	Mayanja, M.N.; Rubaire-Akiiki, C.; Morton, J.; Kabasa, J.D., Pastoral community coping and adaptation strategies to manage household food insecurity consequent to climatic hazards in the cattle corridor of Uganda,
11160173	6216028	TRUE	Kibue, GW; Pan, GX; Zheng, JF; Li, ZD; Mao, L, Assessment of climate change awareness and agronomic practices in an agricultural region of Henan Province, China, ENVIRONMENT DEVELOPMENT AND SUSTAINABILITY
11160175	6216030	TRUE	Amamou, H; Ben Sassi, M; Aouadi, H; Khemiri, H; Mahouachi, M; Beckers, Y; Hammami, H, Climate change-related risks and adaptation strategies as perceived in dairy cattle farming systems in Tunisia, CLIMATE RISK MANAGEMENT
11160177	6216034	TRUE	Shezi, B; Mathee, A; Siziba, W; Street, RA; Naicker, N; Kunene, Z; Wright, CY, Environmental health practitioners potentially play a key role in helping communities adapt to climate change, BMC PUBLIC HEALTH
11160208	6216039	TRUE	Sansilvestri, R; Frascaria-Lacoste, N; Fernandez-Manjarres, J, One option, two countries, several strategies: subjacent mechanisms of assisted migration implementation in Canada and France, RESTORATION ECOLOGY
11160209	6216040	TRUE	Munoz-Sevilla, NP; Azuz-Adeath, I; Le Bail, M, Institutional barriers for the implementation of climate change adaptation actions in the Mexican coastal zones, 8TH INTERNATIONAL CONFERENCE ON ENVIRONMENT SCIENCE AND ENGINEERING (ICESE 2018)
11160211	6216042	TRUE	Rouse, HL; Bell, RG; Lundquist, CJ; Blackett, PE; Hicks, DM; King, DN, Coastal adaptation to climate change in Aotearoa-New Zealand, NEW ZEALAND JOURNAL OF MARINE AND FRESHWATER RESEARCH
11160212	6216043	TRUE	Makame, M.O.; Mwevura, H., Vulnerability and adaptation strategies of coastal communities to theÃ‚Â associated impacts of sea level rise and coastal flooding, Springer Clim.
11160213	6216044	TRUE	Afriyie, K; Ganle, JK; Santos, E, "The floods came and we lost everything': weather extremes and households' asset vulnerability and adaptation in rural Ghana, CLIMATE AND DEVELOPMENT
11160214	6216045	TRUE	Yohannes, Z.; Teshome, M.; Belay, M., Adaptive capacity of mountain community to climate change: case study in the Semien Mountains of Ethiopia,
11160215	6216047	TRUE	Wrigley-Asante, C; Owusu, K; Egyir, IS; Owiyo, TM, Gender dimensions of climate change adaptation practices: the experiences of smallholder crop farmers in the transition zone of Ghana, AFRICAN GEOGRAPHICAL REVIEW
11160226	6216048	TRUE	Cooper, SJ; Wheeler, T, Adaptive governance: Livelihood innovation for climate resilience in Uganda, GEOFORUM
11160227	6216049	TRUE	Gautier, D; Locatelli, B; Corniaux, C; Alary, V, Global changes, livestock and vulnerability: the social construction of markets as an adaptive strategy, GEOGRAPHICAL JOURNAL
11160228	6216050	TRUE	Goffner, D; Sinare, H; Gordon, LJ, The Great Green Wall for the Sahara and the Sahel Initiative as an opportunity to enhance resilience in Sahelian landscapes and livelihoods, REGIONAL ENVIRONMENTAL CHANGE
11160229	6216051	TRUE	Mugi-Ngenga, EW; Mucheru-Muna, MW; Mugwe, JN; Ngetich, FK; Mairura, FS; Mugendi, DN, Household's socio-economic factors influencing the level of adaptation to climate variability in the dry zones of Eastern Kenya, JOURNAL OF RURAL STUDIES
11160230	6216052	TRUE	Pienkowski, D; Zbaraszewski, W, THE CONCEPT OF CLIMATE RESILIENT ECONOMY FROM THE PERSPECTIVE OF LOCAL COMMUNITIES, EKONOMIA I SRODOWISKO-ECONOMICS AND ENVIRONMENT
11160231	6216053	TRUE	van Etten, J; de Sousa, K; Aguilar, A; Barrios, M; Coto, A; Dell'Acqua, M; Fadda, C; Gebrehawaryat, Y; van de Gevel, J; Gupta, A; Kiros, AY; Madriz, B; Mathur, P; Mengistu, DK; Mercado, L; Mohammed, JN; Paliwal, A; Pe, ME; Quiros, CF; Rosas, JC; Sharma, N; Singh, SS; Solanki, IS; Steinke, J, Crop variety management for climate adaptation supported by citizen science, PROCEEDINGS OF THE NATIONAL A…
11160233	6216056	TRUE	Lyons, I; Hill, R; Deshong, S; Mooney, G; Turpin, G, Putting uncertainty under the cultural lens of Traditional Owners from the Great Barrier Reef Catchments, REGIONAL ENVIRONMENTAL CHANGE
11160234	6216057	TRUE	Kgosikoma, KR; Lekota, PC; Kgosikoma, OE, Agro-pastoralists' determinants of adaptation to climate change, INTERNATIONAL JOURNAL OF CLIMATE CHANGE STRATEGIES AND MANAGEMENT
11160235	6216059	TRUE	Berman, RJ; Quinn, CH; Paavola, J, Identifying drivers of household coping strategies to multiple climatic hazards in Western Uganda: implications for adapting to future climate change, CLIMATE AND DEVELOPMENT
11160266	6216060	TRUE	Asmare, F; Teklewold, H; Mekonnen, A, The effect of climate change adaptation strategy on farm households welfare in the Nile basin of Ethiopia Is there synergy or trade-offs?, INTERNATIONAL JOURNAL OF CLIMATE CHANGE STRATEGIES AND MANAGEMENT
11160267	6216061	TRUE	Okunlola, JO; Oke, DO; Adekunle, VAJ; Owolabi, KE, Effects of climate change and coping strategies among crop farmers in South West, Nigeria, AGROFORESTRY SYSTEMS
11160268	6216062	TRUE	Choko, OP; Olabisi, LS; Onyeneke, RU; Chiemela, SN; Liverpool-Tasie, LSO; Rivers, L, A Resilience Approach to Community-Scale Climate Adaptation, SUSTAINABILITY
11160269	6216063	TRUE	Siraw, Z; Degefu, MA; Bewket, W, The role of community-based watershed development in reducing farmers' vulnerability to climate change and variability in the northwestern highlands of Ethiopia, LOCAL ENVIRONMENT
11160270	6216064	TRUE	Middleton, N; Kang, U, Sand and Dust Storms: Impact Mitigation, SUSTAINABILITY
11160271	6216065	TRUE	Jost, C; Kyazze, F; Naab, J; Neelormi, S; Kinyangi, J; Zougmore, R; Aggarwal, P; Bhatta, G; Chaudhury, M; Tapio-Bistrom, ML; Nelson, S; Kristjanson, P, Understanding gender dimensions of agriculture and climate change in smallholder farming communities, CLIMATE AND DEVELOPMENT
11160273	6216067	TRUE	Mainardi, S, Location factors and spatial dependence in household perceptions and adaptations to climate change: A case in the upper Blue Nile Basin, AGREKON
11160274	6216068	TRUE	Samuel, O.O.; Sylvia, T.S., Establishing the nexus between climate change adaptation strategy and smallholder farmers' food security status in South Africa: A bi-casual effect using instrumental variable approach, COGENT SOCIAL SCIENCES
11160275	6216069	TRUE	Czunyi, S.; Pint, L.; Perry, J., Making adaptation fit: Analysis of joint climate change adaptation programs of the mdgf, Handbook of Climate Change Adaptation
11160296	6216070	TRUE	Tessema, YA; Joerin, J; Patt, A, Factors affecting smallholder farmers' adaptation to climate change through non-technological adjustments, ENVIRONMENTAL DEVELOPMENT
11160297	6216071	TRUE	Callo-Concha, D, West African Farmers' Climate Change Adaptation: From Technological Change Towards Transforming Institutions, IMPLEMENTING CLIMATE CHANGE ADAPTATION IN CITIES AND COMMUNITIES: INTEGRATING STRATEGIES AND EDUCATIONAL APPROACHES
11160298	6216072	TRUE	Oyerinde, GT; Lawin, EA; Odofin, AJ, Farmers' Responses to Changing Hydrological Trends in the Niger Basin Parts of Benin, HYDROLOGY
11160299	6216073	TRUE	Miyaguchi, T.; Yamaura, K., Bottom-"wide" approach to climate change - typology and analysis on climate vulnerability reduction through voluntary actions, EnvironmentAsia
11160300	6216074	TRUE	Vedeld, T; Coly, A; Ndour, NM; Hellevik, S, Climate adaptation at what scale? Multi-level governance, resilience, and coproduction in Saint Louis, Senegal, NATURAL HAZARDS
11160301	6216076	TRUE	Ha'apio, MO; Gonzalez, R; Wairiu, M, Is there any chance for the poor to cope with extreme environmental events? Two case studies in the Solomon Islands, WORLD DEVELOPMENT
11160302	6216077	TRUE	Wong, E; Jiang, M; Klint, L; DeLacy, T; Harrison, D; Dominey-Howes, D, Policy Environment for the Tourism Sector's Adaptation to Climate Change in the South Pacific - The Case of Samoa, ASIA PACIFIC JOURNAL OF TOURISM RESEARCH
11160303	6216079	TRUE	Van Der Wolf, J.; Jassogne, L.; Gram, G.I.L.; Vaast, P., TURNING LOCAL KNOWLEDGE on AGROFORESTRY into AN ONLINE DECISION-SUPPORT TOOL for TREE SELECTION in SMALLHOLDERS' FARMS, Exp. Agric.
11160304	6216081	TRUE	Sanogo, K; Binam, J; Bayala, J; Villamor, GB; Kalinganire, A; Dodiomon, S, Farmers' perceptions of climate change impacts on ecosystem services delivery of parklands in southern Mali, AGROFORESTRY SYSTEMS
11160305	6216082	TRUE	Cholo, TC; Fleskens, L; Sietz, D; Peerlings, J, Is Land Fragmentation Facilitating or Obstructing Adoption of Climate Adaptation Measures in Ethiopia?, SUSTAINABILITY
11160335	6216085	TRUE	Lwasa, S; Mugagga, F; Wahab, B; Simon, D; Connors, J; Griffith, C, Urban and peri-urban agriculture and forestry: Transcending poverty alleviation to climate change mitigation and adaptation, URBAN CLIMATE
11160339	6216089	TRUE	Joshua, MK; Ngongondo, C; Chipungu, F; Monjerezi, M; Liwenga, E; Majule, AE; Stathers, T; Lamboll, R, Climate change in semi-arid Malawi: Perceptions, adaptation strategies and water governance, JAMBA-JOURNAL OF DISASTER RISK STUDIES
11160340	6216090	TRUE	Recha, CW; Mukopi, MN; Otieno, JO, Socio-Economic Determinants of Adoption of Rainwater Harvesting and Conservation Techniques in Semi-Arid Tharaka Sub-County, Kenya, LAND DEGRADATION & DEVELOPMENT
11160343	6216093	TRUE	Espada, R; Apan, A; McDougall, K, Spatial modelling of natural disaster risk reduction policies with Markov decision processes, APPLIED GEOGRAPHY
11160345	6216095	TRUE	Kayaga, S; Smout, I, Tariff structures and incentives for water demand management, PROCEEDINGS OF THE INSTITUTION OF CIVIL ENGINEERS-WATER MANAGEMENT
11160367	6216097	TRUE	Fatti, CE; Patel, Z, Perceptions and responses to urban flood risk: Implications for climate governance in the South, APPLIED GEOGRAPHY
11160369	6713556	TRUE	Balgah, RA; Bang, HN; Fondo, SA, Drivers for coping with flood hazards: Beyond the analysis of single cases, JAMBA-JOURNAL OF DISASTER RISK STUDIES
11160370	6713557	TRUE	Velempini, K; Smucker, TA; Clem, KR, Community-based adaptation to climate variability and change: mapping and assessment of water resource management challenges in the North Pare highlands, Tanzania, AFRICAN GEOGRAPHICAL REVIEW
11160371	6713558	TRUE	Chah, JM; Attamah, CO; Odoh, EM, Differences in Climate Change Effects and Adaptation Strategies between Male and Female Livestock Entrepreneurs in Nsukka Agricultural Zone of Enugu State, Nigeria, JOURNAL OF AGRICULTURAL EXTENSION
11160372	6713559	TRUE	Kikwasi, G; Mbuya, E, Vulnerability analysis of building structures to floods The case of flooding informal settlements in Dar es salaam, Tanzania, INTERNATIONAL JOURNAL OF BUILDING PATHOLOGY AND ADAPTATION
11160373	6713564	TRUE	Arimi, KS, Determinants of climate change adaptation strategies used by fish farmers in Epe Local Government Area of Lagos State, Nigeria, JOURNAL OF THE SCIENCE OF FOOD AND AGRICULTURE
11160374	6713565	TRUE	Weldegebriel, ZB; Prowse, M, Climate variability and livelihood diversification in northern Ethiopia: a case study of Lasta and Beyeda districts, GEOGRAPHICAL JOURNAL
11160375	6713568	TRUE	Kanda, A.; Murongazvombo, M.; Ncube, F., Adapting household water use in rural Zimbabwe, Int. J. Environ. Stud.
11160427	6713570	TRUE	Fisher, M; Abate, T; Lunduka, RW; Asnake, W; Alemayehu, Y; Madulu, RB, Drought tolerant maize for farmer adaptation to drought in sub-Saharan Africa: Determinants of adoption in eastern and southern Africa, CLIMATIC CHANGE
11160428	6713574	TRUE	Mubaya, CP; Mafongoya, P, Local-level climate change adaptation decision-making and livelihoods in semi-arid areas in Zimbabwe, ENVIRONMENT DEVELOPMENT AND SUSTAINABILITY
11160429	6713582	TRUE	Hlahla, S; Nel, A; Hill, TR, Assessing municipal-level governance responses to climate change in KwaZulu-Natal, South Africa, JOURNAL OF ENVIRONMENTAL PLANNING AND MANAGEMENT
11160430	6713584	TRUE	Ajayi, J.O., Awareness of climate change and implications for attaining the millennium development goals (MDGS) in niger delta region of nigeria, Agris On-line Pap. Econ. Inf.
11160431	6713585	TRUE	Boafo, YA; Saito, O; Jasaw, GS; Otsuki, K; Takeuchi, K, Provisioning ecosystem services-sharing as a coping and adaptation strategy among rural communities in Ghana's semi-arid ecosystem, ECOSYSTEM SERVICES
11160433	6713603	TRUE	Mpandeli, S., Managing climate risks using seasonal climate forecast information in Vhembe district in Limpopo province, South Africa, J. Sustain. Dev.
11160434	6713604	TRUE	Giddy, JK; Fitchett, JM; Hoogendoorn, G, A CASE STUDY INTO THE PREPAREDNESS OF WHITE-WATER TOURISM TO SEVERE CLIMATIC EVENTS IN SOUTHERN AFRICA, TOURISM REVIEW INTERNATIONAL
11160435	6713605	TRUE	Bele, MY; Sonwa, DJ; Tiani, AM, Local Communities Vulnerability to Climate Change and Adaptation Strategies in Bukavu in DR Congo, JOURNAL OF ENVIRONMENT & DEVELOPMENT
11160506	6713606	TRUE	Daly-Hassen, H; Annabi, M; King-Okumu, C, Social and private profitability of tree-based adaptation options to climate change in a dryland area of Tunisia, NEW MEDIT
11160508	6713608	TRUE	Adebisi-Adelani, O., Citrus and Tomatoes Response to Climate Change: Survey of Farmers' Perception and Adaptation Strategies in Northern Nigeria,
11160509	6713609	TRUE	Nguimalet, CR, Comparison of community-based adaptation strategies for droughts and floods in Kenya and the Central African Republic, WATER INTERNATIONAL
11160510	6713610	TRUE	Okpara, UT; Stringer, LC; Dougill, AJ, Lake drying and livelihood dynamics in Lake Chad: Unravelling the mechanisms, contexts and responses, AMBIO
11160511	6713611	TRUE	Call, M; Gray, C; Jagger, P, Smallholder responses to climate anomalies in rural Uganda, WORLD DEVELOPMENT
11160512	6713612	TRUE	Arku, FS; Angmor, EN; Adjei, GT, Perception and responses of traders to climate change in downtown, Accra, Ghana, INTERNATIONAL JOURNAL OF CLIMATE CHANGE STRATEGIES AND MANAGEMENT
11160514	6713615	TRUE	Pasquini, L; Cowling, RM, Opportunities and challenges for mainstreaming ecosystem-based adaptation in local government: evidence from the Western Cape, South Africa, ENVIRONMENT DEVELOPMENT AND SUSTAINABILITY
11160515	6713616	TRUE	Chanza, N; Chigona, A; Nyahuye, A; Mataera-Chanza, L; Mundoga, T; Nondo, N, Diagnosing barriers to climate change adaptation at community level: reflections from Silobela, Zimbabwe, GEOJOURNAL
11160566	6713618	TRUE	Washington-Ottombre, C; Pijanowski, BC, Rural organizations and adaptation to climate change and variability in rural Kenya, REGIONAL ENVIRONMENTAL CHANGE
11160567	6713620	TRUE	Adebisi-Adelani, O; Oyesola, OB, Fruit Vegetable Farmers' Perception of Climate Change and Adaptation Strategies in Gombe State, Nigeria, II ALL AFRICA HORTICULTURE CONGRESS
11160568	6713624	TRUE	Assan, E; Suvedi, M; Olabisi, LS; Allen, A, Coping with and Adapting to Climate Change: A Gender Perspective from Smallholder Farming in Ghana, ENVIRONMENTS
11160569	6713626	TRUE	Ofoegbu, C; Chirwa, PW; Francis, J; Babalola, FD, Assessing forest-based rural communities' adaptive capacity and coping strategies for climate variability and change: The case of Vhembe district in south Africa, ENVIRONMENTAL DEVELOPMENT
11160570	6713637	TRUE	Teklewold, H.; Gebrehiwot, T.; Bezabih, M., Climate smart agricultural practices and gender differentiated nutrition outcome: An empirical evidence from Ethiopia,
11160571	6713640	TRUE	Ngum, F; Alemagi, D; Duguma, L; Minang, PA; Kehbila, A; Tchoundjeu, Z, Synergizing climate change mitigation and adaptation in Cameroon An overview of multi-stakeholder efforts, INTERNATIONAL JOURNAL OF CLIMATE CHANGE STRATEGIES AND MANAGEMENT
11160572	6713644	TRUE	Gebru, BM; Wang, SW; Kim, SJ; Lee, WK, Socio-Ecological Niche and Factors Affecting Agroforestry Practice Adoption in Different Agroecologies of Southern Tigray, Ethiopia, SUSTAINABILITY
11160574	6713646	TRUE	Aim, F.R.; Nguendo-Yongsi, H.B.; Bryant, C.R.; Boukar, C.; Tueche, C.T., Adaptations of the agricultural calendar and agricultural techniques to climate change in the highlands of cameroon,
11160575	6713650	TRUE	Campion, BB; Venzke, JF, Rainfall variability, floods and adaptations of the urban poor to flooding in Kumasi, Ghana, NATURAL HAZARDS
11160596	6713662	TRUE	Mugume, SN; Melville-Shreeve, P; Gomez, D; Butler, D, Multifunctional urban flood resilience enhancement strategies, PROCEEDINGS OF THE INSTITUTION OF CIVIL ENGINEERS-WATER MANAGEMENT
11160597	6713666	TRUE	Rovin, Kimberly; Hardee, Karen; Kidanu, Aklilu, Linking population, fertility, and family planning with adaptation to climate change: perspectives from Ethiopia., Afr J Reprod Health
11160599	6713673	TRUE	Van Aelst, K; Holvoet, N, Intersections of Gender and Marital Status in Accessing Climate Change Adaptation: Evidence from Rural Tanzania, WORLD DEVELOPMENT
11160600	6713675	TRUE	Rakotobe, ZL; Harvey, CA; Rao, NS; Dave, R; Rakotondravelo, JC; Randrianarisoa, J; Ramanahadray, S; Andriambolantsoa, R; Razafimahatratra, H; Rabarijohn, RH; Rajaofara, H; Rameson, H; MacKinnon, JL, Strategies of smallholder farmers for coping with the impacts of cyclones: A case study from Madagascar, INTERNATIONAL JOURNAL OF DISASTER RISK REDUCTION
11160601	6713678	TRUE	Brockhaus, M; Djoudi, H; Locatelli, B, Envisioning the future and learning from the past: Adapting to a changing environment in northern Mali, ENVIRONMENTAL SCIENCE & POLICY
11160602	6713681	TRUE	Wassie, A; Pauline, N, Evaluating smallholder farmers' preferences for climate smart agricultural practices in Tehuledere District, northeastern Ethiopia, SINGAPORE JOURNAL OF TROPICAL GEOGRAPHY
11160603	6713682	TRUE	Ngigi, MW; Muller, U; Birner, R, Farmers' intrinsic values for adopting climate-smart practices in Kenya: empirical evidence from a means-end chain analysis, CLIMATE AND DEVELOPMENT
11160604	6713689	TRUE	Yegbemey, RN; Yabi, JA; Tovignan, SD; Gantoli, G; Kokoye, SEH, Farmers' decisions to adapt to climate change under various property rights: A case study of maize farming in northern Benin (West Africa), LAND USE POLICY
11160605	6713690	TRUE	Tabbo, AM; Amadou, Z; Danbaky, AB, Evaluating farmers' adaptation strategies to climate change: A case study of Kaou local government area, Tahoua State, Niger Republic, JAMBA-JOURNAL OF DISASTER RISK STUDIES
11160637	6713703	TRUE	Masunungure, C; Shackleton, SE, Exploring Long-Term Livelihood and Landscape Change in Two Semi-Arid Sites in Southern Africa: Drivers and Consequences for Social-Ecological Vulnerability, LAND
11160638	6713717	TRUE	Cattaneo, C.; Massetti, E., DOES HARMFUL CLIMATE INCREASE or DECREASE MIGRATION? EVIDENCE from RURAL HOUSEHOLDS in Nigeria,
11160639	6713718	TRUE	Gorettie, N.N.; Justine, N.J.; Allan, B., Impacts of Climate Change on Small Holder Households in Mt. Elgon Region of Uganda: Does Gender Matter?,
11160640	6713719	TRUE	Songok, C.K.; Kimeu, P.; Kamunge, J.; Ngumbi, R.; Chammah, L.; Adiema, C.; Omondi, C., Lessons learned in the replication and scaling-up of rainwater harvesting technologies in arid and semi-arid areas: A case study of Kilifi County, Kenya,
11160641	6713727	TRUE	Wernersson, J, Rethinking identity in adaptation research: Performativity and livestock keeping practices in the Kenyan drylands, WORLD DEVELOPMENT
11160643	6713728	TRUE	Dube, N; Sithole, M; Ngwenya, T; Muhwati, T; Moyo, E; Manyanga, K, Impact of climate change on sustainability in semi-arid, rural Africa: Lessons from rural Zimbabwe, COGENT SOCIAL SCIENCES
11160646	6713730	TRUE	Schlef, KE; Kabore, L; Karambiri, H; Yang, YCE; Brown, CM, Relating perceptions of flood risk and coping ability to mitigation behavior in West Africa: Case study of Burkina Faso, ENVIRONMENTAL SCIENCE & POLICY
11160647	6713733	TRUE	Okaka, FO; Odhiambo, BDO, Households' perception of flood risk and health impact of exposure to flooding in flood-prone informal settlements in the coastal city of Mombasa, INTERNATIONAL JOURNAL OF CLIMATE CHANGE STRATEGIES AND MANAGEMENT
11160650	6713734	TRUE	Froehlich, P; Al-Saidi, M, Local community perception of climate change adaptation in Egypt, 4TH INTERNATIONAL CONFERENCE ON WATER RESOURCE AND ENVIRONMENT (WRE 2018)
11160701	6713741	TRUE	Pritchard, B; Thielemans, R, 'Rising Waters Don't Lift All Boats': a sustainable livelihood analysis of recursive cycles of vulnerability and maladaptation to flood risk in rural Bihar, India, AUSTRALIAN GEOGRAPHER
11160704	6713750	TRUE	Rahman, S; Islam, MS; Khan, MNH; Touhiduzzaman, M, Climate change adaptation and disaster risk reduction (DRR) through coastal afforestation in South-Central Coast of Bangladesh, MANAGEMENT OF ENVIRONMENTAL QUALITY
11160707	6713753	TRUE	Padigala, B., Social capital and local institutions: A perspective to assess communities adaptation potential to climate change, Handbook of Climate Change Adaptation
11160710	6713754	TRUE	Bohensky, EL; Smajgl, A; Brewer, T, Patterns in household-level engagement with climate change in Indonesia, NATURE CLIMATE CHANGE
11160713	6713755	TRUE	Nguyen, AL; Truong, MH; Verreth, JAJ; Leemans, R; Bosma, RH; De Silva, SS, Exploring the climate change concerns of striped catfish producers in the Mekong Delta, Vietnam, SPRINGERPLUS
11160719	6713757	TRUE	Mohammed, N.; Edwards, R.; Gale, A., Optimisation of Flooding Recovery for Malaysian Universities,
11160721	6713759	TRUE	Ghaderi, Z.; Khoshkam, M.; Henderson, J.C., From snow skiing to grass skiing: Implications of climate change for the ski industry in Dizin, Iran, Anatolia
11160723	6713763	TRUE	Bauer, K, Are preventive and coping measures enough to avoid loss and damage from flooding in Udayapur district, Nepal?, INTERNATIONAL JOURNAL OF GLOBAL WARMING
11160724	6713773	TRUE	Lawrence, J; Quade, D; Becker, J, Integrating the effects of flood experience on risk perception with responses to changing climate risk, NATURAL HAZARDS
11160766	6713775	TRUE	Loria, N.; Bhardwaj, S.K., Farmers' response and adaptation strategies to climate change in low-hills of Himachal Pradesh in India, Nat. Environ. Pollut. Technol.
11160767	6713776	TRUE	Rao, CS; Gopinath, KA; Prasad, JVNS; Prasannakumar; Singh, AK, Climate Resilient Villages for Sustainable Food Security in Tropical India: Concept, Process, Technologies, Institutions, and Impacts, ADVANCES IN AGRONOMY, VOL 140
11160768	6713778	TRUE	Ahmed, KJ; Haq, SMA; Bartiaux, F, The nexus between extreme weather events, sexual violence, and early marriage: a study of vulnerable populations in Bangladesh, POPULATION AND ENVIRONMENT
11160769	6713779	TRUE	Li, H; Gupta, J; Van Dijk, MP, China's drought strategies in rural areas along the Lancang River, WATER POLICY
11160770	6713785	TRUE	Sherpa, P.Y., Institutional climate change adaptation efforts among the Sherpas of the Mount Everest region, Nepal, Res. Econ. Anthropol.
11160772	6713788	TRUE	Nguyen, G.T.H.; Quae, T.T., Analyzing drought adaptation practices of sugarcane growers in Thanh Cong, Thach Thanh District, Thanh Hoa, Vietnam, Tropicultura
11160774	6713803	TRUE	Ou, L; Mendelsohn, R, AN ANALYSIS OF CLIMATE ADAPTATION BY LIVESTOCK FARMERS IN THE ASIAN TROPICS, CLIMATE CHANGE ECONOMICS
11160775	6713805	TRUE	Lindsay, J; Dean, AJ; Supski, S, Responding to the Millennium drought: comparing domestic water cultures in three Australian cities, REGIONAL ENVIRONMENTAL CHANGE
11160796	6713807	TRUE	Skoufias, E; Bandyopadhyay, S; Olivieri, S, Occupational diversification as an adaptation to rainfall variability in rural India, AGRICULTURAL ECONOMICS
11160797	6713809	TRUE	McElwee, P; Nguyen, VHT; Nguyen, DV; Tran, NH; Le, HVT; Nghiem, TP; Vu, HDT, Using REDD plus Policy to Facilitate Climate Adaptation at the Local Level: Synergies and Challenges in Vietnam, FORESTS
11160799	6713811	TRUE	Fernandez-Gimenez, ME; Batkhishig, B; Batbuyan, B; Ulambayar, T, Lessons from the Dzud: Community-Based Rangeland Management Increases the Adaptive Capacity of Mongolian Herders to Winter Disasters, WORLD DEVELOPMENT
11160800	6713812	TRUE	Wang, JX; Huang, JK; Yang, J, Overview of Impacts of Climate Change and Adaptation in China's Agriculture, JOURNAL OF INTEGRATIVE AGRICULTURE
11160801	6713813	TRUE	Bhatta, L.D.; Van Oort, B.E.H.; Stork, N.E.; Baral, H., Ecosystem services and livelihoods in a changing climate: Understanding local adaptations in the Upper Koshi, Nepal, Int. J. Biodiversity Sci. Ecosyst. serv. Manage.
11160802	6713814	TRUE	Ojha, HR; Sulaiman, R; Sultana, P; Dahal, K; Thapa, D; Mittal, N; Thompson, P; Bhatta, GD; Ghimire, L; Aggarwal, P, Is South Asian Agriculture Adapting to Climate Change? Evidence from the Indo-Gangetic Plains, AGROECOLOGY AND SUSTAINABLE FOOD SYSTEMS
11160803	6713832	TRUE	Cornes, IC; Cook, B, Localising climate change: heatwave responses in urban households, DISASTER PREVENTION AND MANAGEMENT
11160804	6713841	TRUE	Saito, N, Mainstreaming climate change adaptation in least developed countries in South and Southeast Asia, MITIGATION AND ADAPTATION STRATEGIES FOR GLOBAL CHANGE
11160805	6713842	TRUE	Saha, S.K., Cyclone, salinity intrusion and adaptation and coping measures in coastal Bangladesh, Space Cult. India
11160826	6713845	TRUE	Tanjeela, M; Rutherford, S, The Influence of Gender Relations on Women's Involvement and Experience in Climate Change Adaptation Programs in Bangladesh, SAGE OPEN
11160827	6713846	TRUE	Hong, NB; Yabe, M, Improvement in irrigation water use efficiency: a strategy for climate change adaptation and sustainable development of Vietnamese tea production, ENVIRONMENT DEVELOPMENT AND SUSTAINABILITY
11160828	6713847	TRUE	Akhtar, R; Afroz, R; Masud, MM; Rahman, M; Khalid, H; Duasa, JB, Farmers' perceptions, awareness, attitudes and adaption behaviour towards climate change, JOURNAL OF THE ASIA PACIFIC ECONOMY
11160829	6713848	TRUE	Su, YF; Bisht, S; Wilkes, A; Pradhan, NS; Zou, YH; Liu, S; Hyde, K, Gendered Responses to Drought in Yunnan Province, China, MOUNTAIN RESEARCH AND DEVELOPMENT
11160830	6713849	TRUE	Seekao, C; Pharino, C, Assessment of the flood vulnerability of shrimp farms using a multicriteria evaluation and GIS: a case study in the Bangpakong Sub-Basin, Thailand, ENVIRONMENTAL EARTH SCIENCES
11160831	6713850	TRUE	Wang, Y; Wang, J; Li, SC; Qin, DH, Vulnerability of the Tibetan Pastoral Systems to Climate and Global Change, ECOLOGY AND SOCIETY
11160832	6713852	TRUE	Hossain, MN; Paul, P, Impacts of climatic variability on agriculture and options for adaptation in the Surma River basin, Bangladesh, ENVIRONMENTAL MONITORING AND ASSESSMENT
11160833	6713853	TRUE	Akompab, DA; Bi, P; Williams, S; Saniotis, A; Walker, IA; Augoustinos, M, Engaging stakeholders in an adaptation process: governance and institutional arrangements in heat-health policy development in Adelaide, Australia, MITIGATION AND ADAPTATION STRATEGIES FOR GLOBAL CHANGE
11160834	6713855	TRUE	Fallon, DSM; Sullivan, CA, Are We There Yet? NSW local governments' progress on climate change, AUSTRALIAN GEOGRAPHER
11160906	6713859	TRUE	Kakumanu, KR; Kuppanan, P; Ranganathan, CR; Shalander, K; Amare, H, Assessment of risk premium in farm technology adoption as a climate change adaptation strategy in the dryland systems of India, INTERNATIONAL JOURNAL OF CLIMATE CHANGE STRATEGIES AND MANAGEMENT
11160907	6713865	TRUE	McNamara, KE, Taking stock of community-based climate-change adaptation projects in the Pacific, ASIA PACIFIC VIEWPOINT
11160908	6713868	TRUE	Haynes, K; Tanner, TM, Empowering young people and strengthening resilience: youth-centred participatory video as a tool for climate change adaptation and disaster risk reduction, CHILDRENS GEOGRAPHIES
11160909	6713870	TRUE	Bowden, V; Nyberg, D; Wright, C, Planning for the past: Local temporality and the construction of denial in climate change adaptation, GLOBAL ENVIRONMENTAL CHANGE-HUMAN AND POLICY DIMENSIONS
11160910	6713871	TRUE	Mazur, N; Curtis, A; Rogers, M, Do You See What I See? Rural Landholders' Belief in Climate Change, SOCIETY & NATURAL RESOURCES
11160911	6713877	TRUE	Dhanya, P; Ramachandran, A, Farmers' perceptions of climate change and the proposed agriculture adaptation strategies in a semi arid region of south India, JOURNAL OF INTEGRATIVE ENVIRONMENTAL SCIENCES
11160912	6713878	TRUE	Renaud, FG; Le, TTH; Lindener, C; Guong, VT; Sebesvari, Z, Resilience and shifts in agro-ecosystems facing increasing sea-level rise and salinity intrusion in Ben Tre Province, Mekong Delta, CLIMATIC CHANGE
11160913	6713879	TRUE	Lebel, L, Local knowledge and adaptation to climate change in natural resource-based societies of the Asia-Pacific, MITIGATION AND ADAPTATION STRATEGIES FOR GLOBAL CHANGE
11160914	6713880	TRUE	Ahsan, MN, Can Strategies to Cope with Hazard Shocks be Explained by At-Risk Households' Socioeconomic Asset Profile? Evidence from Tropical Cyclone-Prone Coastal Bangladesh, INTERNATIONAL JOURNAL OF DISASTER RISK SCIENCE
11160915	6713881	TRUE	Yu, QY; Wu, WB; Liu, ZH; Verburg, PH; Xia, T; Yang, P; Lu, ZJ; You, LZ; Tang, HJ, Interpretation of Climate Change and Agricultural Adaptations by Local Household Farmers: a Case Study at Bin County, Northeast China, JOURNAL OF INTEGRATIVE AGRICULTURE
11160926	6713883	TRUE	Casse, T; Milhoj, A; Nguyen, TP, Vulnerability in north-central Vietnam: do natural hazards matter for everybody?, NATURAL HAZARDS
11160927	6713886	TRUE	Tabassum, I; Rahman, F; Haq, F, Dynamics of communal land degradation and its implications in the arid mountains of pakistan: A study of District Karak, Khyber Pakhtunkuwa, JOURNAL OF MOUNTAIN SCIENCE
11160928	6713888	TRUE	Shah, SIA; Zhou, JH; Shah, AA, Ecosystem-based Adaptation (EbA) practices in smallholder agriculture; emerging evidence from rural Pakistan, JOURNAL OF CLEANER PRODUCTION
11160929	6713889	TRUE	Ravera, F; Martin-Lopez, B; Pascual, U; Drucker, A, The diversity of gendered adaptation strategies to climate change of Indian farmers: A feminist intersectional approach, AMBIO
11160930	6713890	TRUE	Zografos, C; Anguelovski, I; Grigorova, M, When exposure to climate change is not enough: Exploring heatwave adaptive capacity of a multi-ethnic, low-income urban community in Australia, URBAN CLIMATE
11160931	6713892	TRUE	Liu, T; Xu, YJ; Zhang, YH; Yan, QH; Song, XL; Xie, HY; Luo, Y; Rutherford, S; Chu, C; Lin, HL; Ma, WJ, Associations between risk perception, spontaneous adaptation behavior to heat waves and heatstroke in Guangdong province, China, BMC PUBLIC HEALTH
11160932	6713894	TRUE	Li, CY; Tang, Y; Luo, H; Di, BF; Zhang, LY, Local Farmers' Perceptions of Climate Change and Local Adaptive Strategies: A Case Study from the Middle Yarlung Zangbo River Valley, Tibet, China, ENVIRONMENTAL MANAGEMENT
11160933	6713895	TRUE	Monnereau, I; Abraham, S, Limits to autonomous adaptation in response to coastal erosion in Kosrae, Micronesia, INTERNATIONAL JOURNAL OF GLOBAL WARMING
11160934	6713896	TRUE	Kodirekkala, KR, Cultural adaptation to climate change among indigenous people of South India, CLIMATIC CHANGE
11160935	6713899	TRUE	Lei, YD; Wang, JA; Yue, YJ; Yin, YY; Sheng, ZY, How adjustments in land use patterns contribute to drought risk adaptation in a changing climate-A case study in China, LAND USE POLICY
11160946	6713902	TRUE	Li, S; An, PL; Pan, ZH; Wang, FT; Li, XM; Liu, Y, Farmers' initiative on adaptation to climate change in the Northern Agro-pastoral Ecotone, INTERNATIONAL JOURNAL OF DISASTER RISK REDUCTION
11160947	6713906	TRUE	Chandra, A; Gaganis, P, Deconstructing vulnerability and adaptation in a coastal river basin ecosystem: a participatory analysis of flood risk in Nadi, Fiji Islands, CLIMATE AND DEVELOPMENT
11160948	6713907	TRUE	Ling, FH; Tamura, M; Yasuhara, K; Ajima, K; Trinh, C, Reducing flood risks in rural households: survey of perception and adaptation in the Mekong delta, CLIMATIC CHANGE
11160949	6713909	TRUE	Shukla, G; Kumar, A; Pala, NA; Chakravarty, S, Farmers perception and awareness of climate change: a case study from Kanchandzonga Biosphere Reserve, India, ENVIRONMENT DEVELOPMENT AND SUSTAINABILITY
11160951	6713913	TRUE	Abid, M; Schneider, UA; Scheffran, J, Adaptation to climate change and its impacts on food productivity and crop income: Perspectives of farmers in rural Pakistan, JOURNAL OF RURAL STUDIES
11160952	6713916	TRUE	Birk, T; Rasmussen, K, Migration from atolls as climate change adaptation: Current practices, barriers and options in Solomon Islands, NATURAL RESOURCES FORUM
11160953	6713918	TRUE	Purwanto, E.; Darmawan, E., The adaptation strategy of dwelling in the riverside settlement of the Arut River in Pangkalan Bun City, West Kotawaringin Regency, Central Kalimantan,
11160955	6713920	TRUE	Hirota, I, Multiple risk management during agricultural production shortages in a mountain village in northern Laos-Roles of forest resources, livestock and the market economy, INTERNATIONAL CONFERENCE ON CLIMATE CHANGE (ICCC 2018)
11161022	6713921	TRUE	Kutzner, D, Environmental change, resilience, and adaptation in nature-based tourism: conceptualizing the social-ecological resilience of birdwatching tour operations, JOURNAL OF SUSTAINABLE TOURISM
11161023	6713922	TRUE	Bremer, S; Haque, MM; Bin Aziz, S; Kvamme, S, 'My new routine': Assessing the impact of citizen science on climate adaptation in Bangladesh, ENVIRONMENTAL SCIENCE & POLICY
11161024	6713923	TRUE	Bizikova, L; Parry, JE; Karami, J; Echeverria, D, Review of key initiatives and approaches to adaptation planning at the national level in semi-arid areas, REGIONAL ENVIRONMENTAL CHANGE
11161025	6713924	TRUE	Karimi, V; Karami, E; Keshavarz, M, Climate change and agriculture: Impacts and adaptive responses in Iran, JOURNAL OF INTEGRATIVE AGRICULTURE
11161026	6713925	TRUE	Merrey, DJ; Hussain, A; Tamang, DD; Thapa, B; Prakash, A, Evolving high altitude livelihoods and climate change: a study from Rasuwa District, Nepal, FOOD SECURITY
11161027	6713926	TRUE	Biggs, EM; Gupta, N; Saikia, SD; Duncan, JMA, The tea landscape of Assam: Multi-stakeholder insights into sustainable livelihoods under a changing climate, ENVIRONMENTAL SCIENCE & POLICY
11161028	6713928	TRUE	Dangi, MB; Chaudhary, RP; Rijal, K; Stahl, PD; Belbase, S; Gerow, KG; Fernandez, D; Pyakurel, B, Impacts of environmental change on agroecosystems and livelihoods in Annapurna Conservation Area, Nepal, ENVIRONMENTAL DEVELOPMENT
11161029	6713935	TRUE	Devkota, RP; Pandey, VP; Bhattarai, U; Shrestha, H; Adhikari, S; Dulal, KN, Climate change and adaptation strategies in Budhi Gandaki River Basin, Nepal: a perception-based analysis, CLIMATIC CHANGE
11161030	6713936	TRUE	Zahari, RK; Ariffin, RNR, Risk communications: flood-prone communities of Kuala Lumpur, 3RD INTERNATIONAL CONFERENCE ON SUSTAINABLE FUTURE FOR HUMAN SECURITY, SUSTAIN 2012
11161031	6713939	TRUE	Piya, L; Maharjan, KL; Joshi, NP, Determinants of adaptation practices to climate change by Chepang households in the rural Mid-Hills of Nepal, REGIONAL ENVIRONMENTAL CHANGE
11161062	6713941	TRUE	Chiang, YC; Ling, TY, Exploring Flood Resilience Thinking in the Retail Sector under Climate Change: A Case Study of an Estuarine Region of Taipei City, SUSTAINABILITY
11161064	6713959	TRUE	Patnaik, U; Narayanan, K, How effective are coping mechanisms in securing livelihoods against climatic aberrations? Evidences from rural India, INTERNATIONAL JOURNAL OF CLIMATE CHANGE STRATEGIES AND MANAGEMENT
11161065	6713960	TRUE	Yadav, SS; Lal, R, Vulnerability of women to climate change in arid and semi-arid regions: The case of India and South Asia, JOURNAL OF ARID ENVIRONMENTS
11161066	6713962	TRUE	Singh, C; Rahman, A; Srinivas, A; Bazaz, A, Risks and responses in rural India: Implications for local climate change adaptation action, CLIMATE RISK MANAGEMENT
11161067	6713964	TRUE	Deb, A.K.; Haque, C.E., Livelihood Diversification as a Climate Change Coping Strategy Adopted by Small-Scale Fishers of Bangladesh,
11161068	6713967	TRUE	Sano, D.; Prabhakar, S.V.R.K.; Kartikasari, K.; Irawan, D.J., Developing Adaptation Policies in the Agriculture Sector: Indonesia's Experience, Clim. Change Adapt. in Pract.: From Strateg. Dev. to Implement.
11161069	6713969	TRUE	Basu, M.; Hoshino, S.; Hashimoto, S., Many issues, limited responses: Coping with water insecurity in rural India, Water Resour. Rural Dev.
11161070	6713970	TRUE	Koubi, V; Spilker, G; Schaffer, L; Bernauer, T, Environmental Stressors and Migration: Evidence from Vietnam, WORLD DEVELOPMENT
11161071	6713971	TRUE	Hu, D; Te-Pai, J; Chen, YY, A Study of Flood Disaster Risk Communication Model and Adaptive Behaviours for River-Watershed residents in Taiwan, INTERNATIONAL REVIEW FOR SPATIAL PLANNING AND SUSTAINABLE DEVELOPMENT
11161104	6713972	TRUE	Bhatta, GD; Aggarwal, PK; Poudel, S; Belgrave, DA, Climate-induced Migration in South Asia: Migration Decisions and the Gender Dimensions of Adverse Climatic Events, JOURNAL OF RURAL AND COMMUNITY DEVELOPMENT
11161106	6713974	TRUE	Ferdous, MR; Wesselink, A; Brandimarte, L; Slager, K; Zwarteveen, M; Di Baldassarre, G, The Costs of Living with Floods in the Jamuna Floodplain in Bangladesh, WATER
11161109	6713976	TRUE	Kabir, MJ; Cramb, R; Alauddin, M; Roth, C, Farming adaptation to environmental change in coastal Bangladesh: shrimp culture versus crop diversification, ENVIRONMENT DEVELOPMENT AND SUSTAINABILITY
11161111	6713987	TRUE	Elrick-Barr, CE; Smith, TF; Preston, BL; Thomsen, DC; Baum, S, How are coastal households responding to climate change?, ENVIRONMENTAL SCIENCE & POLICY
11161113	6713990	TRUE	Mercer, J; Kelman, I; do Rosario, F; Lima, ADD; da Silva, A; Beloff, AM; McClean, A, Nation-building policies in Timor-Leste: disaster risk reduction, including climate change adaptation, DISASTERS
11161116	6714002	TRUE	Kautto, N; Trundle, A; McEvoy, D, Climate adaptation planning in the higher education sector, INTERNATIONAL JOURNAL OF SUSTAINABILITY IN HIGHER EDUCATION
11161119	6714008	TRUE	Ayeb-Karlsson, Sonja; van der Geest, Kees; Ahmed, Istiakh; Huq, Saleemul; Warner, Koko, A people-centred perspective on climate change, environmental stress, and livelihood resilience in Bangladesh.,
11161122	6714012	TRUE	Eakin, H; Lerner, AM; Manuel-Navarrete, D; Aguilar, BH; Martinez-Canedo, A; Tellman, B; Charli-Joseph, L; Alvarez, RF; Bojorquez-Tapia, L, Adapting to risk and perpetuating poverty: Household's strategies for managing flood risk and water scarcity in Mexico City, ENVIRONMENTAL SCIENCE & POLICY
11161124	6714013	TRUE	Ioris, AAR; Irigaray, CT; Girard, P, Institutional responses to climate change: opportunities and barriers for adaptation in the Pantanal and the Upper Paraguay River Basin, CLIMATIC CHANGE
11161127	6714014	TRUE	Ward, R; Gonthier, D; Nicholls, C, Ecological resilience to coffee rust: Varietal adaptations of coffee farmers in Copan, Honduras, AGROECOLOGY AND SUSTAINABLE FOOD SYSTEMS
11161128	6714016	TRUE	Villamayor-Tomas, S; Garcia-Lopez, G, The influence of community-based resource management institutions on adaptation capacity: A large-n study of farmer responses to climate and global market disturbances, GLOBAL ENVIRONMENTAL CHANGE-HUMAN AND POLICY DIMENSIONS
11161129	6714019	TRUE	Vasconcelos, ACF; Bonatti, M; Schlindwein, SL; D'Agostini, LR; Homem, LR; Nelson, R, Landraces as an adaptation strategy to climate change for smallholders in Santa Catarina, Southern Brazil, LAND USE POLICY
11161130	6714022	TRUE	Vogt, N; Pinedo-Vasquez, M; Brondizio, ES; Rabelo, FG; Fernandes, K; Almeida, O; Riveiro, S; Deadman, PJ; Dou, Y, Local ecological knowledge and incremental adaptation to changing flood patterns in the Amazon delta, SUSTAINABILITY SCIENCE
11161131	6714026	TRUE	Oviedo, AFP; Mitraud, S; McGrath, DG; Bursztyn, M, Implementing climate variability adaptation at the community level in the Amazon floodplain, ENVIRONMENTAL SCIENCE & POLICY
11161132	6714032	TRUE	Pischke, E.C.; Azahara Mesa-Jurado, M.; Eastmond, A.; Abrams, J.; Halvorsen, K.E., Community perceptions of socioecological stressors and risk-reducing strategies in Tabasco, Mexico, J. Environ. Stud. Sci.
11161133	6714038	TRUE	Ardaya, AB; Evers, M; Ribbe, L, What influences disaster risk perception? Intervention measures, flood and landslide risk perception of the population living in flood risk areas in Rio de Janeiro state, Brazil, INTERNATIONAL JOURNAL OF DISASTER RISK REDUCTION
11161134	6714040	TRUE	RondÃƒÂ³n-Krummheuer, A.; Gruening, C.; Jungfleisch, C., Microfinance for ecosystem-based adaptation (MEbA) in Peru and Colombia,
11161135	6714041	TRUE	Ruiz-Mallen, I; Corbera, E; Calvo-Boyero, D; Reyes-Garcia, V; Brown, K, How do biosphere reserves influence local vulnerability and adaptation? Evidence from Latin America, GLOBAL ENVIRONMENTAL CHANGE-HUMAN AND POLICY DIMENSIONS
11161136	6714047	TRUE	Lillo-Ortega, G; Aldunce, P; Adler, C; Vidal, M; Rojas, M, On the evaluation of adaptation practices: a transdisciplinary exploration of drought measures in Chile, SUSTAINABILITY SCIENCE
11161137	6714058	TRUE	Acevedo-Osorio, ÃƒÂ.; Leiton, A.A.; DurÃƒÂ¡n, M.V.L.; Quiroga, K.L.F., Sustentability and climate variability: Participatory agroecologycal actions to adaptation and socio-ecological reesilience in the colombian high-andean region, Rev. Luna Azul
11161148	6714059	TRUE	Chain-Guadarrama, A; Martinez-Rodriguez, MR; Cardenas, JM; Vilchez-Mendoza, S; Harvey, CA, Ecosystem-based Adaptation by smallholder basic grain farms in Guatemala and Honduras, AGRONOMIA MESOAMERICANA
11161149	6714064	TRUE	Thompson, D, Community adaptations to environmental challenges under decentralized governance in southwestern Uruguay, JOURNAL OF RURAL STUDIES
11161150	6714068	TRUE	Kithiia, J, Resourceless victims or resourceful collectives: Addressing the impacts of climate change through social capital in fringing coastal communities, OCEAN & COASTAL MANAGEMENT
11161151	6714069	TRUE	Hurlimann, A; Barnett, J; Fincher, R; Osbaldiston, N; Mortreux, C; Graham, S, Urban planning and sustainable adaptation to sea-level rise, LANDSCAPE AND URBAN PLANNING
11161152	6714070	TRUE	Gasbarro, F; Pinkse, J, Corporate Adaptation Behaviour to Deal With Climate Change: The Influence of Firm-Specific Interpretations of Physical Climate Impacts, CORPORATE SOCIAL RESPONSIBILITY AND ENVIRONMENTAL MANAGEMENT
11161153	6714071	TRUE	Li, CS; Song, Y, Government response to climate change in China: a study of provincial and municipal plans, JOURNAL OF ENVIRONMENTAL PLANNING AND MANAGEMENT
11161154	6714072	TRUE	Rivera, C; Wamsler, C, Integrating climate change adaptation, disaster risk reduction and urban planning: A review of Nicaraguan policies and regulations, INTERNATIONAL JOURNAL OF DISASTER RISK REDUCTION
11161155	6714074	TRUE	Beaudoin, M; Gosselin, P, An effective public health program to reduce urban heat islands in Quebec, Canada, REVISTA PANAMERICANA DE SALUD PUBLICA-PAN AMERICAN JOURNAL OF PUBLIC HEALTH
11161156	6714075	TRUE	Hughey, KFD; Becken, S, Understanding climate coping as a basis for strategic climate change adaptation - The case of Queenstown-Lake Wanaka, New Zealand, GLOBAL ENVIRONMENTAL CHANGE-HUMAN AND POLICY DIMENSIONS
11161157	6714076	TRUE	Johnson, C; Blackburn, S, Advocacy for urban resilience: UNISDR's Making Cities Resilient Campaign, ENVIRONMENT AND URBANIZATION
11161168	6714077	TRUE	Parry, J, The UK response to the challenge of climate change, PROCEEDINGS OF THE INSTITUTION OF CIVIL ENGINEERS-MUNICIPAL ENGINEER
11161169	6714079	TRUE	Freduah, G; Fidelman, P; Smith, TF, Adaptive capacity of small-scale coastal fishers to climate and non-climate stressors in the Western region of Ghana, GEOGRAPHICAL JOURNAL
11161170	6714080	TRUE	Lyles, W; Berke, P; Overstreet, KH, Where to begin municipal climate adaptation planning? Evaluating two local choices, JOURNAL OF ENVIRONMENTAL PLANNING AND MANAGEMENT
11161171	6714082	TRUE	Beiler, MO; Marroquin, L; McNeil, S, State-of-the-practice assessment of climate change adaptation practices across metropolitan planning organizations pre- and post-Hurricane Sandy, TRANSPORTATION RESEARCH PART A-POLICY AND PRACTICE
11161172	6714083	TRUE	Araos, M; Austin, SE; Berrang-Ford, L; Ford, JD, Public Health Adaptation to Climate Change in Large Cities: A Global Baseline, INTERNATIONAL JOURNAL OF HEALTH SERVICES
11161173	6714084	TRUE	Tran, YL; Siry, JP; Bowker, JM; Poudyal, NC, THE ROLE OF THE U.S. MAYORS AND URBAN FORESTS IN ADDRESSING CLIMATE CHANGE MITIGATION AND ADAPTATION, MATHEMATICAL AND COMPUTATIONAL FORESTRY & NATURAL-RESOURCE SCIENCES
11161174	6714085	TRUE	Papin, M, Transnational municipal networks: Harbingers of innovation for global adaptation governance?, INTERNATIONAL ENVIRONMENTAL AGREEMENTS-POLITICS LAW AND ECONOMICS
11161176	6714090	TRUE	Widener, JM; Gliedt, TJ; Hartman, P, Visualizing dynamic capabilities as adaptive capacity for municipal water governance, SUSTAINABILITY SCIENCE
11161177	6714091	TRUE	Craft, J; Howlett, M; Crawford, M; McNutt, K, Assessing Policy Capacity for Climate Change Adaptation: Governance Arrangements, Resource Deployments, and Analytical Skills in Canadian Infrastructure Policy Making, REVIEW OF POLICY RESEARCH
11161178	6714092	TRUE	Berse, K, Climate change from the lens of Malolos children: perception, impact and adaptation, DISASTER PREVENTION AND MANAGEMENT
11161179	6714094	TRUE	Storbjork, S; Hjerpe, M, "Sometimes Climate Adaptation is Politically Correct": A Case Study of Planners and Politicians Negotiating Climate Adaptation in Waterfront Spatial Planning, EUROPEAN PLANNING STUDIES
11161180	6714095	TRUE	Hedelin, B, The EU Floods Directive trickling down: tracing the ideas of integrated and participatory flood risk management in Sweden, WATER POLICY
11161181	6714097	TRUE	Nelson, GLM; Zamora, OB; de Guzman, LEP; Tatlonghari, RV; Espaldon, MVO; Brillon, JA, The Indigenous Practices and Climate Change Responses of Ati and Suludnon Farmers in Iloilo, Philippines, JOURNAL OF ENVIRONMENTAL SCIENCE AND MANAGEMENT
11161183	6714099	TRUE	Tosun, J; Leopold, L, Aligning Climate Governance with Urban Water Management: Insights from Transnational City Networks, WATER
11161184	6714101	TRUE	Miao, Q; Welch, EW; Zhang, FX; Sriraj, PS, What drives public transit organizations in the United States to adapt to extreme weather events?, JOURNAL OF ENVIRONMENTAL MANAGEMENT
11161185	6714102	TRUE	Picketts, IM; Curry, J; Dery, SJ; Cohen, SJ, Learning with practitioners: climate change adaptation priorities in a Canadian community, CLIMATIC CHANGE
11161186	6714104	TRUE	Walker, BJA; Adger, WN; Russel, D, Institutional barriers to climate change adaptation in decentralised governance structures: Transport planning in England, URBAN STUDIES
11161188	6714106	TRUE	Bakhsh, K; Rauf, S; Zulfiqar, F, Adaptation strategies for minimizing heat wave induced morbidity and its determinants, SUSTAINABLE CITIES AND SOCIETY
11161189	6714107	TRUE	Haque, AN; Dodman, D; Hossain, MM, Individual, communal and institutional responses to climate change by low-income households in Khulna, Bangladesh, ENVIRONMENT AND URBANIZATION
11161190	6714108	TRUE	Hegger, DLT; Driessen, PPJ; Wiering, M; van Rijswick, HFMW; Kundzewicz, ZW; Matczak, P; Crabbe, A; Raadgever, GT; Bakker, MHN; Priest, SJ; Larrue, C; Ek, K, Toward more flood resilience: Is a diversification of flood risk management strategies the way forward?, ECOLOGY AND SOCIETY
11161191	6714109	TRUE	Robinson, GM; Bardsley, DK; Raymond, CM; Underwood, T; Moskwa, E; Weber, D; Waschl, N; Bardsley, AM, Adapting to Climate Change: Lessons from Farmers and Peri-Urban Fringe Residents in South Australia, ENVIRONMENTS
11161192	6714110	TRUE	Wijaya, N, Climate Change Adaptation Measures in the Coastal City of Semarang, Indonesia: Current Practices and Performance, JOURNAL OF REGIONAL AND CITY PLANNING
11161193	6714113	TRUE	Hung, H.-C.; Lu, Y.-T.; Hung, C.-H., The determinants of integrating policy-based and community-based adaptation into coastal hazard risk management: a resilience approach,
11161194	6714114	TRUE	Araos, M; Berrang-Ford, L; Ford, JD; Austin, SE; Biesbroek, R; Lesnikowski, A, Climate change adaptation planning in large cities: A systematic global assessment, ENVIRONMENTAL SCIENCE & POLICY
11161195	6714115	TRUE	Tyler, S; Nugraha, E; Nguyen, HK; Nguyen, NV; Sari, AD; Thinpanga, P; Tran, TT; Verma, SS, Indicators of urban climate resilience: A contextual approach, ENVIRONMENTAL SCIENCE & POLICY
11161196	6714116	TRUE	Solecki, W; Leichenko, R; Eisenhauer, D, Extreme Climate Events, Household Decision-Making and Transitions in the Immediate Aftermath of Hurricane Sandy, MISCELLANEA GEOGRAPHICA
11161197	6714117	TRUE	Wamsler, C; Brink, E, Moving beyond short-term coping and adaptation, ENVIRONMENT AND URBANIZATION
11161198	6714118	TRUE	Ali, F.M.M.; Jones, K., Negotiating community resilience in the city in a time of political change and deficit reduction, Int. J. Disaster Resilience Built Environ.
11161199	6714120	TRUE	Juhola, S, Barriers to the implementation of climate change adaptation in land use planning A multi-level governance problem?, INTERNATIONAL JOURNAL OF CLIMATE CHANGE STRATEGIES AND MANAGEMENT
11161200	6714122	TRUE	Noblet, M; Brisson, G, Adaptation to climate change in Quebec's coastal zone: a difficult transformation of public action, INTERNATIONAL JOURNAL OF CLIMATE CHANGE STRATEGIES AND MANAGEMENT
11161201	6714124	TRUE	Rotter, M; Hoffmann, E; Pechan, A; Stecker, R, Competing priorities: how actors and institutions influence adaptation of the German railway system, CLIMATIC CHANGE
11161202	6714125	TRUE	Belanger, D; Abdous, B; Gosselin, P; Valois, P, An adaptation index to high summer heat associated with adverse health impacts in deprived neighborhoods, CLIMATIC CHANGE
11161203	6714126	TRUE	Samora-Arvela, A; Ferrao, J; Ferreira, J; Panagopoulos, T; Vaz, E, GREEN INFRASTRUCTURE, CLIMATE CHANGE AND SPATIAL PLANNING: LEARNING LESSONS ACROSS BORDERS, JOURNAL OF SPATIAL AND ORGANIZATIONAL DYNAMICS
11161204	6714127	TRUE	Zolch, T; Wamsler, C; Pauleit, S, Integrating the ecosystem-based approach into municipal climate adaptation strategies: The case of Germany, JOURNAL OF CLEANER PRODUCTION
11161205	6714128	TRUE	Silva, MM; Costa, JP, Urban Floods and Climate Change Adaptation: The Potential of Public Space Design When Accommodating Natural Processes, WATER
11161206	6714130	TRUE	van der Heijden, J, Voluntary programmes for building retrofits: opportunities, performance and challenges, BUILDING RESEARCH AND INFORMATION
11161208	6714134	TRUE	Flyen, C; Hauge, AL; Almas, AJ; Godbolt, AL, Municipal collaborative planning boosting climate resilience in the built environment, INTERNATIONAL JOURNAL OF DISASTER RESILIENCE IN THE BUILT ENVIRONMENT
11161209	6714137	TRUE	McManus, P; Shrestha, KK; Yoo, D, Equity and climate change: Local adaptation issues and responses in the City of Lake Macquarie, Australia, URBAN CLIMATE
11161210	6714138	TRUE	Grafakos, S; Trigg, K; Landauer, M; Chelleri, L; Dhakal, S, Analytical framework to evaluate the level of integration of climate adaptation and mitigation in cities, CLIMATIC CHANGE
11161211	6714139	TRUE	Sandholz, S; Lange, W; Nehren, U, Governing green change: Ecosystem-based measures for reducing landslide risk in Rio de Janeiro, INTERNATIONAL JOURNAL OF DISASTER RISK REDUCTION
11161212	6714140	TRUE	Lee, JS; Kim, JW, Assessing Strategies for Urban Climate Change Adaptation: The Case of Six Metropolitan Cities in South Korea, SUSTAINABILITY
11161213	6714141	TRUE	Rosendo, S; Celliers, L; Mechisso, M, Doing more with the same: A reality-check on the ability of local government to implement Integrated Coastal Management for climate change adaptation, MARINE POLICY
11159629	6714142	TRUE	Di Giulio, GM; Bedran-Martins, AMB; Vasconcellos, MD; Ribeiro, WC; Lemos, MC, Mainstreaming climate adaptation in the megacity of Sao Paulo, Brazil, CITIES
11159632	6714144	TRUE	Zwierzchowska, I; Fagiewicz, K; Ponizy, L; Lupa, P; Mizgajski, A, Introducing nature-based solutions into urban policy - facts and gaps. Case study of Poznan, LAND USE POLICY
11159636	6714150	TRUE	Stiller, S; Meijerink, S, Leadership within regional climate change adaptation networks: the case of climate adaptation officers in Northern Hesse, Germany, REGIONAL ENVIRONMENTAL CHANGE
11159643	6714154	TRUE	Wamsler, C.; Brink, E., The role of individual adaptive practices for sustainable adaptation, Int. J. Disaster Resilience Built Environ.
11159647	6714158	TRUE	McCall, T.; Beckmann, S.; Kawe, C.; Abel, F.; Hornberg, C., Climate change adaptation and mitigationÃ¢â‚¬â€œa hitherto neglected gender-sensitive public health perspective, Clim. Dev.
11159651	6714161	TRUE	Seebauer, S; Babcicky, P, Trust and the communication of flood risks: comparing the roles of local governments, volunteers in emergency services, and neighbours, JOURNAL OF FLOOD RISK MANAGEMENT
11159655	6714164	TRUE	Porter, JJ; Dessai, S; Tompkins, EL, What do we know about UK household adaptation to climate change? A systematic review, CLIMATIC CHANGE
11159659	6714165	TRUE	Wamsler, C; Brink, E, Interfacing citizens' and institutions' practice and responsibilities for climate change adaptation, URBAN CLIMATE
11159661	6714170	TRUE	den Exter, R; Lenhart, J; Kern, K, Governing climate change in Dutch cities: anchoring local climate strategies in organisation, policy and practical implementation, LOCAL ENVIRONMENT
11159696	6714172	TRUE	Grygoruk, M; Rannow, S, Mind the gap! Lessons from science-based stakeholder dialogue in climate-adapted management of wetlands, JOURNAL OF ENVIRONMENTAL MANAGEMENT
11159697	6714173	TRUE	Duzi, B; Vikhrov, D; Kelman, I; Stojanov, R; Juricka, D, Household measures for river flood risk reduction in the Czech Republic, JOURNAL OF FLOOD RISK MANAGEMENT
11159698	6714174	TRUE	Poussin, JK; Botzen, WJW; Aerts, JCJH, Effectiveness of flood damage mitigation measures: Empirical evidence from French flood disasters, GLOBAL ENVIRONMENTAL CHANGE-HUMAN AND POLICY DIMENSIONS
11159699	6714175	TRUE	Koerth, J; Vafeidis, AT; Hinkel, J; Sterr, H, What motivates coastal households to adapt pro-actively to sea-level rise and increasing flood risk?, REGIONAL ENVIRONMENTAL CHANGE
11159700	6714178	TRUE	Martinez-Juarez, P; Chiabai, A; Suarez, C; Quiroga, S, Insights on Urban and Periurban Adaptation Strategies Based on Stakeholders' Perceptions on Hard and Soft Responses to Climate Change, SUSTAINABILITY
11159701	6714179	TRUE	Gundersen, V; Kaltenborn, BP; Williams, DR, A bridge over troubled water: A contextual analysis of social vulnerability to climate change in a riverine landscape in south-east Norway, NORSK GEOGRAFISK TIDSSKRIFT-NORWEGIAN JOURNAL OF GEOGRAPHY
11159702	6714180	TRUE	Mitter, H; Schonhart, M; Larcher, M; Schmid, E, The Stimuli-Actions-Effects-Responses (SAER)-framework for exploring perceived relationships between private and public climate change adaptation in agriculture, JOURNAL OF ENVIRONMENTAL MANAGEMENT
11159703	6714182	TRUE	Koerth, J; Vafeidis, AT; Carretero, S; Sterr, H; Hinkel, J, A typology of household-level adaptation to coastal flooding and its spatio-temporal patterns, SPRINGERPLUS
11159704	6714183	TRUE	Koerth, J; Jones, N; Vafeidis, AT; Dimitrakopoulos, PG; Melliou, A; Chatzidimitriou, E; Koukoulas, S, Household adaptation and intention to adapt to coastal flooding in the Axios - Loudias - Aliakmonas National Park, Greece, OCEAN & COASTAL MANAGEMENT
11159766	6714185	TRUE	Cantos, JO; Vera-Rebollo, JF, Adaptation of the tourism sector to climate change in Spain. The importance of action at local level and in tourism businesses, ANALES DE GEOGRAFIA DE LA UNIVERSIDAD COMPLUTENSE
11159767	6714191	TRUE	Klein, J, Embeddedness of climate change adaptation: established procedures and contending discourses for flood protection in Espoo, Finland, LOCAL ENVIRONMENT
11159768	6714193	TRUE	Gomez-Martin, MB; Armesto-Lopez, XA; Martinez-Ibarra, E, The Spanish tourist sector facing extreme climate events: a case study of domestic tourism in the heat wave of 2003, INTERNATIONAL JOURNAL OF BIOMETEOROLOGY
11159769	6714195	TRUE	Flannery, W; Lynch, K; Cinneide, MO, Consideration of coastal risk in the Irish spatial planning process, LAND USE POLICY
11159770	6714196	TRUE	KlÃƒÂ¶ck, C., Dealing with climate change in the German Wadden Sea: Perceptions, measures, and contestation on Hallig Hooge,
11159771	6714197	TRUE	Johannsdottir, L; Davidsdottir, B; Goodsite, ME; Olafsson, S, What is the potential and demonstrated role of non-life insurers in fulfilling climate commitments? A case study of Nordic insurers, ENVIRONMENTAL SCIENCE & POLICY
11159772	6714200	TRUE	Ingold, K.; Balsiger, J., Sustainability principles put into practice: case studies of network analysis in Swiss climate change adaptation, Reg. Environ. Change
11159773	6714201	TRUE	Mees, H, Local governments in the driving seat? A comparative analysis of public and private responsibilities for adaptation to climate change in European and North-American cities, JOURNAL OF ENVIRONMENTAL POLICY & PLANNING
11159774	6714202	TRUE	van Buuren, A; Driessen, P; Teisman, G; van Rijswick, M, Toward legitimate governance strategies for climate adaptation in the Netherlands: combining insights from a legal, planning, and network perspective, REGIONAL ENVIRONMENTAL CHANGE
11159775	6714204	TRUE	Dannevig, H; Hovelsrud, GK, Understanding the need for adaptation in a natural resource dependent community in Northern Norway: issue salience, knowledge and values, CLIMATIC CHANGE
11159827	6714206	TRUE	Neethling, E; Petitjean, T; Quenol, H; Barbeau, G, Assessing local climate vulnerability and winegrowers' adaptive processes in the context of climate change, MITIGATION AND ADAPTATION STRATEGIES FOR GLOBAL CHANGE
11159828	6714208	TRUE	Andrew, JT; Sauquet, E, Climate Change Impacts and Water Management Adaptation in Two Mediterranean-Climate Watersheds: Learning from the Durance and Sacramento Rivers, WATER
11159829	6714211	TRUE	Klein, J; Juhola, S; Landauer, M, Local authorities and the engagement of private actors in climate change adaptation, ENVIRONMENT AND PLANNING C-POLITICS AND SPACE
11159830	6714212	TRUE	Ebi, KL; del Barrio, MO, Lessons Learned on Health Adaptation to Climate Variability and Change: Experiences Across Low- and Middle-Income Countries, ENVIRONMENTAL HEALTH PERSPECTIVES
11159831	6714213	TRUE	Boeri, A; Fini, G; Gaspari, J; Gianfrate, V; Longo, D, Bologna resilient city: from the adaptation plan to local actions, TECHNE-JOURNAL OF TECHNOLOGY FOR ARCHITECTURE AND ENVIRONMENT
11159832	6714216	TRUE	Li, S; Juhasz-Horvath, L; Harrison, PA; Pinter, L; Rounsevell, MDA, Relating farmer's perceptions of climate change risk to adaptation behaviour in Hungary, JOURNAL OF ENVIRONMENTAL MANAGEMENT
11159833	6714218	TRUE	Papadaskalopoulou, C; Katsou, E; Valta, K; Moustakas, K; Malamis, D; Dodou, M, Review and assessment of the adaptive capacity of the water sector in Cyprus against climate change impacts on water availability, RESOURCES CONSERVATION AND RECYCLING
11159834	6714219	TRUE	Hamilton-Webb, A; Manning, L; Naylor, R; Conway, J, The relationship between risk experience and risk response: a study of farmers and climate change, JOURNAL OF RISK RESEARCH
11159835	6714220	TRUE	Waldman, K.B.; Attari, S.Z.; Gower, D.B.; Giroux, S.A.; Caylor, K.K.; Evans, T.P., The salience of climate change in farmer decision-making within smallholder semi-arid agroecosystems,
11159876	6714222	TRUE	Aniah, P; Kaunza-Nu-Dem, MK; Ayembilla, JA, Smallholder farmers' livelihood adaptation to climate variability and ecological changes in the savanna agro ecological zone of Ghana, HELIYON
11159877	6714223	TRUE	Lane, D; Murdock, E; Genskow, K; Betz, CR; Chatrchyan, A, Climate Change and Dairy in New York and Wisconsin: Risk Perceptions, Vulnerability, and Adaptation among Farmers and Advisors, SUSTAINABILITY
11159878	6714224	TRUE	Mulwa, C; Marenya, P; Rahut, DB; Kassie, M, Response to climate risks among smallholder farmers in Malawi: A multivariate probit assessment of the role of information, household demographics, and farm characteristics, CLIMATE RISK MANAGEMENT
11159879	6714225	TRUE	Mihiretu, A; Okoyo, EN; Lemma, T, Determinants of adaptation choices to climate change in agro-pastoral dry lands of Northeastern Amhara, Ethiopia, COGENT ENVIRONMENTAL SCIENCE
11159881	6714227	TRUE	Khanal, U; Wilson, C; Hoang, VN; Lee, BL, Autonomous adaptations to climate change and rice productivity: a case study of the Tanahun district, Nepal, CLIMATE AND DEVELOPMENT
11159882	6714228	TRUE	Singh, AK; Jha, SK; Majumdar, B; Roy, ML; Sarkar, S; Ghorai, AK, Impacts of climate smart jute farming on resource use efficiency, productivity and economic benefits in rural Eastern India, OUTLOOK ON AGRICULTURE
11159883	6714232	TRUE	Kumar, S; Sidana, BK, Enhancing Farmers' Income through Climate Resilient Technologies, INDIAN JOURNAL OF ECONOMICS AND DEVELOPMENT
11159884	6714233	TRUE	Vincent, K; Cull, T; Chanika, D; Hamazakaza, P; Joubert, A; Macome, E; Mutonhodza-Davies, C, Farmers' responses to climate variability and change in southern Africa - is it coping or adaptation?, CLIMATE AND DEVELOPMENT
11159885	6714234	TRUE	Fagariba, CJ; Song, SX; Baoro, SKGS, Climate change in Upper East Region of Ghana; challenges existing in farming practices and new mitigation policies, OPEN AGRICULTURE
11159906	6714235	TRUE	McMartin, D.W.; Hernani Merino, B.H., Analysing the links between agriculture and climate change: Can 'best management practices' be responsive to climate extremes?, Int. J. Agric. Resour. Gov. Ecol.
11159907	6714238	TRUE	Sharma, G; Partap, U; Dahal, DR; Sharma, DP; Sharma, E, Declining Large-Cardamom Production Systems in the Sikkim Himalayas, MOUNTAIN RESEARCH AND DEVELOPMENT
11159908	6714240	TRUE	van Gameren, V; Zaccai, E, Private forest owners facing climate change in Wallonia: Adaptive capacity and practices, ENVIRONMENTAL SCIENCE & POLICY
11159909	6714241	TRUE	Oluwasusi, JO, Farmers adaptation strategies to the effect of climate variation on yam production in Ekiti State, Nigeria, JOURNAL OF FOOD AGRICULTURE & ENVIRONMENT
11159910	6714242	TRUE	Seekao, C; Pharino, C, Key factors affecting the flood vulnerability and adaptation of the shrimp farming sector in Thailand, INTERNATIONAL JOURNAL OF DISASTER RISK REDUCTION
11159911	6714243	TRUE	Tran, TA; Nguyen, TH; Vo, TT, Adaptation to flood and salinity environments in the Vietnamese Mekong Delta: Empirical analysis of farmer-led innovations, AGRICULTURAL WATER MANAGEMENT
11159912	6714245	TRUE	Amare, Z.Y.; Ayoade, J.O.; Adelekan, I.O.; Zeleke, M.T., Barriers to and determinants of the choice of crop management strategies to combat climate change in Dejen District, Nile Basin of Ethiopia, Agric. Food Secur.
11159913	6714246	TRUE	Huang, JK; Jiang, J; Wang, JX; Hou, LL, Crop Diversification in Coping with Extreme Weather Events in China, JOURNAL OF INTEGRATIVE AGRICULTURE
11159914	6714247	TRUE	Karadzic, V; Antunes, P; Grin, J, Adapting to environmental and market change: Insights from Fish Producer Organizations in Portugal, OCEAN & COASTAL MANAGEMENT
11159915	6714248	TRUE	Debray, V; Wezel, A; Lambert-Derkimba, A; Roesch, K; Lieblein, G; Francis, CA, Agroecological practices for climate change adaptation in semiarid and subhumid Africa, AGROECOLOGY AND SUSTAINABLE FOOD SYSTEMS
11159926	6714249	TRUE	Sangeda, A.Z.; Maleko, D.D.; Mtengeti, E.J., Socio-economic and ecological dimensions of climate variability and change for agro-pastoral communities in central Tanzania, Livest. Res. Rural Dev.
11159927	6714250	TRUE	Bhatta, GD; Ojha, HR; Aggarwal, PK; Sulaiman, VR; Sultana, P; Thapa, D; Mittal, N; Dahal, K; Thomson, P; Ghimire, L, Agricultural innovation and adaptation to climate change: empirical evidence from diverse agro-ecologies in South Asia, ENVIRONMENT DEVELOPMENT AND SUSTAINABILITY
11159929	6714252	TRUE	Ado, A.M.; Leshan, J.; Savadogo, P.; Bo, L.; Shah, A.A., Farmers' awareness and perception of climate change impacts: case study of Aguie district in Niger, Environ. Dev. Sustainability
11159930	6714253	TRUE	Kusters, K; Wangdi, N, The costs of adaptation: changes in water availability and farmers' responses in Punakha district, Bhutan, INTERNATIONAL JOURNAL OF GLOBAL WARMING
11159931	6714254	TRUE	Quan, SP; Li, YM; Song, JX; Zhang, T; Wang, MY, Adaptation to Climate Change and its Impacts on Wheat Yield: Perspective of Farmers in Henan of China, SUSTAINABILITY
11159932	6714255	TRUE	Basupi, LV; Quinn, CH; Dougill, AJ, Adaptation strategies to environmental and policy change in semi-arid pastoral landscapes: Evidence from Ngamiland, Botswana, JOURNAL OF ARID ENVIRONMENTS
11159933	6714256	TRUE	Finkbeiner, EM, The role of diversification in dynamic small-scale fisheries: Lessons from Baja California Sur, Mexico, GLOBAL ENVIRONMENTAL CHANGE-HUMAN AND POLICY DIMENSIONS
11159934	6714259	TRUE	Taboada, C; Garcia, M; Gilles, J; Pozo, O; Yucra, E; Rojas, K, Can warmer be better? Changing production systems in three Andean ecosystems in the face of environmental change, JOURNAL OF ARID ENVIRONMENTS
11159935	6714260	TRUE	Egyir, I.S.; Ofori, K.; Antwi, G.; Ntiamoa-Baidu, Y., Adaptive capacity and coping strategies in the face of climate change: A comparative study of communities around two protected areas in the coastal savanna and transitional zones of Ghana, J. Sustain. Dev.
11159956	6714261	TRUE	Ullah, W; Nihei, T; Nafees, M; Zaman, R; Ali, M, Understanding climate change vulnerability, adaptation and risk perceptions at household level in Khyber Pakhtunkhwa, Pakistan, INTERNATIONAL JOURNAL OF CLIMATE CHANGE STRATEGIES AND MANAGEMENT
11159958	6714264	TRUE	Holland, T; Smit, B, Recent climate change in the Prince Edward County winegrowing region, Ontario, Canada: implications for adaptation in a fledgling wine industry, REGIONAL ENVIRONMENTAL CHANGE
11159960	6714268	TRUE	Harvey, CA; Rakotobe, ZL; Rao, NS; Dave, R; Razafimahatratra, H; Rabarijohn, RH; Rajaofara, H; MacKinnon, JL, Extreme vulnerability of smallholder farmers to agricultural risks and climate change in Madagascar, PHILOSOPHICAL TRANSACTIONS OF THE ROYAL SOCIETY B-BIOLOGICAL SCIENCES
11159961	6714269	TRUE	Zhang, LJ; Wang, JX; Zhang, GS; Huang, QQ, Impact of the methods of groundwater access on irrigation and crop yield in the North China Plain Does climate matter?, CHINA AGRICULTURAL ECONOMIC REVIEW
11159962	6714270	TRUE	de la Poterie, AT; Burchfield, EK; Carrico, AR, The implications of group norms for adaptation in collectively managed agricultural systems: evidence from Sri Lankan paddy farmers, ECOLOGY AND SOCIETY
11159963	6714271	TRUE	Opiyo, F; Wasonga, O; Nyangito, M; Schilling, J; Munang, R, Drought Adaptation and Coping Strategies Among the Turkana Pastoralists of Northern Kenya, INTERNATIONAL JOURNAL OF DISASTER RISK SCIENCE
11159964	6714272	TRUE	Bai, JF; Xu, ZG; Qiu, HG; Liu, HY, Optimising seed portfolios to cope ex ante with risks from bad weather: evidence from a recent maize farmer survey in China, AUSTRALIAN JOURNAL OF AGRICULTURAL AND RESOURCE ECONOMICS
11159965	6714273	TRUE	Jezeer, R.E.; Verweij, P.A.; Boot, R.G.A.; Junginger, M.; Santos, M.J., Influence of livelihood assets, experienced shocks and perceived risks on smallholder coffee farming practices in Peru, J. Environ. Manage.
11159966	6714274	TRUE	Fahad, S; Wang, J; Hu, GY; Wang, H; Yang, XY; Shah, AA; Huong, NTL; Bilal, A, Empirical analysis of factors influencing farmers crop insurance decisions in Pakistan: Evidence from Khyber Pakhtunkhwa province, LAND USE POLICY
11159967	6714275	TRUE	Lopez-i-Gelats, F; Paco, JLC; Huayra, RH; Robles, ODS; Pena, ECQ; Filella, JB, Adaptation Strategies of Andean Pastoralist Households to Both Climate and Non-Climate Changes, HUMAN ECOLOGY
11159968	6714276	TRUE	Khanal, U; Wilson, C; Lee, BL; Hoang, VN, Climate change adaptation strategies and food productivity in Nepal: a counterfactual analysis, CLIMATIC CHANGE
11159969	6714277	TRUE	Zhou, D.; Aoyagi, M.; Okayasu, T.; Mastuda, H.; Hara, Y.; Okuro, T.; Takeuchi, K., Resilience of traditional rice-dominated agricultural communities to precipitation variability in the North China Plain, Clim. Res.
11159970	6714278	TRUE	Jain, M; Naeem, S; Orlove, B; Modi, V; DeFries, RS, Understanding the causes and consequences of differential decision-making in adaptation research: Adapting to a delayed monsoon onset in Gujarat, India, GLOBAL ENVIRONMENTAL CHANGE-HUMAN AND POLICY DIMENSIONS
11159971	6714279	TRUE	Dinh, H; Daly, A; Freyens, B, Farm adjustment strategies to water-related challenges in the Murray-Darling Basin, POLICY STUDIES
11159972	6714281	TRUE	Shisanya, S; Mafongoya, P, Adaptation to climate change and the impacts on household food security among rural farmers in uMzinyathi District of Kwazulu-Natal, South Africa, FOOD SECURITY
11159973	6714283	TRUE	Westengen, OT; Nyanga, P; Chibamba, D; Guillen-Royo, M; Banik, D, A climate for commerce: the political agronomy of conservation agriculture in Zambia, AGRICULTURE AND HUMAN VALUES
11159974	6714284	TRUE	Hellin, J; Ratner, BD; Meinzen-Dick, R; Lopez-Ridaura, S, Increasing social-ecological resilience within small-scale agriculture in conflict-affected Guatemala, ECOLOGY AND SOCIETY
11159975	6714285	TRUE	Suberi, B; Tiwari, KR; Gurung, DB; Bajracharya, RM; Sitaula, BK, People's perception of climate change impacts and their adaptation practices in Khotokha valley, Wangdue, Bhutan, INDIAN JOURNAL OF TRADITIONAL KNOWLEDGE
11160026	6714287	TRUE	Rahn, E; Liebig, T; Ghazoul, J; van Asten, P; Laderach, P; Vaast, P; Sarmiento, A; Garcia, C; Jassogne, L, Opportunities for sustainable intensification of coffee agro-ecosystems along an altitudinal gradient on Mt. Elgon, Uganda, AGRICULTURE ECOSYSTEMS & ENVIRONMENT
11160027	6714288	TRUE	Oo, AT; Van Huylenbroeck, G; Speelman, S, Determining factors for the application of climate change adaptation strategies among farmers in Magwe District, dry zone region of Myanmar, INTERNATIONAL JOURNAL OF CLIMATE CHANGE STRATEGIES AND MANAGEMENT
11160028	6714289	TRUE	Cordova, R; Hogarth, NJ; Kanninen, M, Mountain Farming Systems' Exposure and Sensitivity to Climate Change and Variability: Agroforestry and Conventional Agriculture Systems Compared in Ecuador's Indigenous Territory of Kayambi People, SUSTAINABILITY
11160029	6714290	TRUE	Etongo, D; Djenontin, INS; Kanninen, M; Fobissie, K, Smallholders' Tree Planting Activity in the Ziro Province, Southern Burkina Faso: Impacts on Livelihood and Policy Implications, FORESTS
11160030	6714291	TRUE	Hurlbert, M, Adaptive institutional design in agri-environmental programs, INTERNATIONAL JOURNAL OF CLIMATE CHANGE STRATEGIES AND MANAGEMENT
11160031	6714292	TRUE	Rouabhi, A; Hafsi, M; Monneveux, P, Climate change and farming systems in the region of Setif (Algeria), JOURNAL OF AGRICULTURE AND ENVIRONMENT FOR INTERNATIONAL DEVELOPMENT
11160032	6714293	TRUE	Zhang, Q; Cui, FQ; Dai, LW; Feng, B; Lu, YJ; Tang, HP, Pastoralists' perception of and adaptation strategies for climate change: associations with observed climate variability, NATURAL HAZARDS
11160033	6714294	TRUE	Yamba, S; Appiah, DO; Siaw, LP, Smallholder farmers' perceptions and adaptive response to climate variability and climate change in southern rural Ghana, COGENT SOCIAL SCIENCES
11160034	6714295	TRUE	Sharif, J; Rafiq, MK; Rafiq, MT; Aziz, R; Qayyum, A; Saleem, AR; Nisa, WU; Jenks, MA; Li, Y, CLIMATE CHANGE PERCEPTIONS AND ADAPTIVE ACTIONS BY PASTORAL COMMUNITY ON THE TIBETAN PLATEAU, CHINA, APPLIED ECOLOGY AND ENVIRONMENTAL RESEARCH
11160035	6714296	TRUE	Shikuku, KM; Winowiecki, L; Twyman, J; Eitzinger, A; Perez, JG; Mwongera, C; Laderach, P, Smallholder farmers' attitudes and determinants of adaptation to climate risks in East Africa, CLIMATE RISK MANAGEMENT
11160056	6714297	TRUE	Nasir, M.J.; Khan, A.S.; Alam, S., Climate change and agriculture: An overview of farmers perception and adaptations in Balambat Tehsil, District Dir Lower, Pakistan,
11160057	6714298	TRUE	Maharjan, S.K., Local adaptation plan of action framework and process in the agriculture sector in Nepal,
11160058	6714299	TRUE	Nkuba, M.; Chanda, R.; Mmopelwa, G.; Kato, E.; Mangheni, M.N.; Lesolle, D., The effect of climate information in pastoralists' adaptation to climate change: A case study of Rwenzori region, Western Uganda,
11160059	6714300	TRUE	Nordhagen, S; Pascual, U, The Impact of Climate Shocks on Seed Purchase Decisions in Malawi: Implications for Climate Change Adaptation, WORLD DEVELOPMENT
11160060	6714301	TRUE	Nguyen, TT; Pittock, J; Nguyen, BH, Integration of ecosystem-based adaptation to climate change policies in Viet Nam, CLIMATIC CHANGE
11160061	6714302	TRUE	Zhang, Q; Xue, HL; Zhao, XY; Tang, HP, Linking livelihood assets of smallholder households to risk management strategies: an empirical study in China, ENVIRONMENTAL HAZARDS-HUMAN AND POLICY DIMENSIONS
11160062	6714303	TRUE	Huang, JK; Wang, YJ; Wang, JX, Farmers' Adaptation to Extreme Weather Events through Farm Management and Its Impacts on the Mean and Risk of Rice Yield in China, AMERICAN JOURNAL OF AGRICULTURAL ECONOMICS
11160063	6714304	TRUE	Nyasimi, M; Kimeli, P; Sayula, G; Radeny, M; Kinyangi, J; Mungai, C, Adoption and dissemination pathways for climate-smart agriculture technologies and practices for climate-resilient livelihoods in Lushoto, Northeast Tanzania, CLIMATE
11160064	6714305	TRUE	Rahut, DB; Ali, A, Impact of climate-change risk-coping strategies on livestock productivity and household welfare: empirical evidence from Pakistan, HELIYON
11160065	6714307	TRUE	Makate, C.; Makate, M.; Mango, N., Smallholder farmers' perceptions on climate change and the use of sustainable agricultural practices in the chinyanja triangle, Southern Africa, Soc. Sci.
11160096	6714309	TRUE	Nyikahadzoi, K.; Adekunle, A.; Fatunbi; Zamasiya, B., Promoting production and marketing of root crops in Southern Africa in a changing climate using integrated agricultural research for development (IAR4D) pathway, Afr. J. Food Agric. Nutr. Dev.
11160097	6714310	TRUE	Mishra, AK; Pede, VO, Perception of climate change and adaptation strategies in Vietnam Are there intra-household gender differences?, INTERNATIONAL JOURNAL OF CLIMATE CHANGE STRATEGIES AND MANAGEMENT
11160098	6714311	TRUE	Kumar, SN; Anuja; Rashid, M; Bandyopadhyay, SK; Padaria, R; Khanna, M, Adaptation of farming community to climatic risk: does adaptation cost for sustaining agricultural profitability?, CURRENT SCIENCE
11160099	6714312	TRUE	Jawid, A.; Khadjavi, M., Adaptation to climate change in Afghanistan: Evidence on the impact of external interventions,
11160100	6714313	TRUE	Munandar, A.; Rahardjo, E.T.; Cahyani, A., Correlation between Knowledge of the Farmers - The Alumni of Climate Field School at Kabupaten Bogor and Adaption to Climate Change,
11160101	6714314	TRUE	Balehegn, M; Eik, LO; Tesfay, Y, Silvopastoral system based on Ficus thonningii: an adaptation to climate change in northern Ethiopia, AFRICAN JOURNAL OF RANGE & FORAGE SCIENCE
11160102	6714315	TRUE	Hossain, MN; Chowdhury, S; Paul, SK, Farmer-level adaptation to climate change and agricultural drought: empirical evidences from the Barind region of Bangladesh, NATURAL HAZARDS
11160103	6714316	TRUE	Habiba, U; Shaw, R; Takeuchi, Y, Farmers' adaptive practices for drought risk reduction in the northwest region of Bangladesh, NATURAL HAZARDS
11160104	6714317	TRUE	Ranjbar, Z.; Chizari, M.; Sadighi, H.; Farhadian, H., Extension services and behavioral strategies of farmers to deal with risk,
11160105	6714318	TRUE	Pham, V.H.T.; Febriamansyah, R.; Afrizal; Tran, T.A., Government intervention and farmers' adaptation to Saline intrusion: A case study in the Vietnamese Mekong Delta,
11160116	6714319	TRUE	Moller, LR; Smith-Hall, C; Meilby, H; Rayamajhi, S; Herslund, LB; Larsen, HO; Nielsen, OJ; Byg, A, Empirically based analysis of households coping with unexpected shocks in the central Himalayas, CLIMATE AND DEVELOPMENT
11160117	6714320	TRUE	Paulus, C.A.; Pellokila, M.R.; Sobang, Y.U.L.; Azmanajaya, E., The alternative livelihood development strategy in order to improve local fishermen revenue in the Border region of Indonesia and timor leste,
11160118	6714321	TRUE	Bekele, B; Wu, W; Yirsaw, E; Negussie, W; Alemayehu, A, CLIMATE CHANGE AND ITS EFFECT ON LAND USE CHANGE IN THE CENTRAL RIFT VALLEY OF ETHIOPIA, APPLIED ECOLOGY AND ENVIRONMENTAL RESEARCH
11160119	6714322	TRUE	Snyder, SA; Kilgore, MA; Emery, MR; Schmitz, M, Maple Syrup Producers of the Lake States, USA: Attitudes Towards and Adaptation to Social, Ecological, and Climate Conditions, ENVIRONMENTAL MANAGEMENT
11160120	6714323	TRUE	Leal, W; Nzengya, D; Muasya, G; Chemuliti, J; Kalungu, JW, Climate change responses among the Maasai Community in Kenya, CLIMATIC CHANGE
11160121	6714324	TRUE	Rodas-Trejo, J.; Medina SansÃƒÂ³n, L.; Chang Gutierrez, D.; Ocampo-GonzÃƒÂ¡lez, P.; MarÃƒÂ­n MuÃƒÂ±oz, E.S.; Carrillo LÃƒÂ³pez, M.R., Impacts and adaptations to the effects of climate change: A case study in a cattle community in Chiapas, Mexico, Rev. Electron. Vet.
11160123	6714327	TRUE	StÃƒÂ¶ber, S.; Moraza, C.; Zahl, L.; Kagai, E., Low-Tech irrigation strategies for smallholder vegetable farmers in Kenya, Rainwater-Smart Agric. in Arid and Semi-Arid Areas: Fostering the Use of Rainwater for Food Secur., Poverty Alleviation, Landsc. Restor. and Clim. Resil.
11160124	6714329	TRUE	Abdulai, I; Jassogne, L; Graefe, S; Asare, R; Van Asten, P; Laderach, P; Vaast, P, Characterization of cocoa production, income diversification and shade tree management along a climate gradient in Ghana, PLOS ONE
11160125	6714330	TRUE	Kibet, S; Nyangito, M; MacOpiyo, L; Kenfack, D, Tracing innovation pathways in the management of natural and social capital on Laikipia Maasai Group Ranches, Kenya, PASTORALISM-RESEARCH POLICY AND PRACTICE
11160146	6714331	TRUE	Wang, J; Brown, DG; Agrawal, A, Climate adaptation, local institutions, and rural livelihoods: A comparative study of herder communities in Mongolia and Inner Mongolia, China, GLOBAL ENVIRONMENTAL CHANGE-HUMAN AND POLICY DIMENSIONS
11160147	6714332	TRUE	Weston, P; Hong, R; Kabore, C; Kull, CA, Farmer-Managed Natural Regeneration Enhances Rural Livelihoods in Dryland West Africa, ENVIRONMENTAL MANAGEMENT
11160148	6714334	TRUE	Singh, RK; Kumar, S; Jat, HS; Singh, A; Raju, R; Sharma, DK, Adaptation in rice-wheat based sodic agroecosystems: A case study on climate resilient farmers' practices, INDIAN JOURNAL OF TRADITIONAL KNOWLEDGE
11160149	6714336	TRUE	Chengappa, PG; Devika, CM; Rudragouda, CS, Climate variability and mitigation: perceptions and strategies adopted by traditional coffee growers in India, CLIMATE AND DEVELOPMENT
11160150	6714337	TRUE	Comoe, H; Finger, R; Barjolle, D, Farm management decision and response to climate variability and change in Cte d'Ivoire, MITIGATION AND ADAPTATION STRATEGIES FOR GLOBAL CHANGE
11160151	6714338	TRUE	Aryal, JP; Jat, ML; Sapkota, TB; Khatri-Chhetri, A; Kassie, M; Rahut, DB; Maharjan, S, Adoption of multiple climate-smart agricultural practices in the Gangetic plains of Bihar, India, INTERNATIONAL JOURNAL OF CLIMATE CHANGE STRATEGIES AND MANAGEMENT
11160152	6714340	TRUE	Asrat, P.; Simane, B., Farmers' perception of climate change and adaptation strategies in the Dabus watershed, North-West Ethiopia, Ecol. Processes
11160153	6714341	TRUE	Murniati, K; Widjaya, S; Rabiatul, A; Listiana, I, Climate Change Adaptation Strategy for Sustainability and Food Security of Cassava Farming Households in Lampung, Indonesia, JOURNAL OF AGRICULTURAL EXTENSION
11160154	6714342	TRUE	Ullah, W; Nafees, M; Khurshid, M; Nihei, T, Assessing farmers' perspectives on climate change for effective farm-level adaptation measures in Khyber Pakhtunkhwa, Pakistan, ENVIRONMENTAL MONITORING AND ASSESSMENT
11160155	6714344	TRUE	Tran, TA; Rodela, R, Integrating farmers' adaptive knowledge into flood management and adaptation policies in the Vietnamese Mekong Delta: A social learning perspective, GLOBAL ENVIRONMENTAL CHANGE-HUMAN AND POLICY DIMENSIONS
11160186	6714345	TRUE	Ahmed, MNQ; Haq, SMA, Indigenous people's perceptions about climate change, forest resource management, and coping strategies: a comparative study in Bangladesh, ENVIRONMENT DEVELOPMENT AND SUSTAINABILITY
11160187	6714346	TRUE	Lim-Camacho, L; Ariyawardana, A; Lewis, GK; Crimp, SJ; Somogyi, S; Ridoutt, B; Howden, SM, Climate adaptation of food value chains: the implications of varying consumer acceptance, REGIONAL ENVIRONMENTAL CHANGE
11160188	6714347	TRUE	Jiri, O; Mafongoya, PL; Chivenge, P, Building climate change resilience through adaptation in smallholder farming systems in semi-arid Zimbabwe, INTERNATIONAL JOURNAL OF CLIMATE CHANGE STRATEGIES AND MANAGEMENT
11160189	6714348	TRUE	Roco, L; Bravo-Ureta, B; Engler, A; Jara-Rojas, R, The Impact of Climatic Change Adaptation on Agricultural Productivity in Central Chile: A Stochastic Production Frontier Approach, SUSTAINABILITY
11160190	6714352	TRUE	Fatuase, AI, Climate change adaptation: a panacea for food security in Ondo State, Nigeria, THEORETICAL AND APPLIED CLIMATOLOGY
11160191	6714353	TRUE	Arshad, M; Kachele, H; Krupnik, TJ; Amjath-Babu, TS; Aravindakshan, S; Abbas, A; Mehmood, Y; Muller, K, Climate variability, farmland value, and farmers' perceptions of climate change: implications for adaptation in rural Pakistan, INTERNATIONAL JOURNAL OF SUSTAINABLE DEVELOPMENT AND WORLD ECOLOGY
11160192	6714354	TRUE	Berhe, M; Hoag, D; Tesfay, G; Tadesse, T; Oniki, S; Kagatsume, M; Keske, CMH, The effects of adaptation to climate change on income of households in rural Ethiopia, PASTORALISM-RESEARCH POLICY AND PRACTICE
11160193	6714355	TRUE	Roesch-McNally, GE, U.S. Inland Pacific Northwest Wheat Farmers' Perceived Risks: Motivating Intentions to Adapt to Climate Change?, ENVIRONMENTS
11160194	6714357	TRUE	Liao, C; Fei, D, Sedentarization as Constrained Adaptation: Evidence from Pastoral Regions in Far Northwestern China, HUMAN ECOLOGY
11160195	6714360	TRUE	Prasad, R; Pandey, AK; Newaj, R; Dhyani, SK; Saroj, NK; Tripathi, VD, Risk and vulnerability due to climate change and adaptation initiatives for agricultural resilience in Panna district of Madhya Pradesh, central India, RANGE MANAGEMENT AND AGROFORESTRY
11160236	6714361	TRUE	Muchuru, S; Nhamo, G, Climate change adaptation and the African fisheries: evidence from the UNFCCC National Communications, ENVIRONMENT DEVELOPMENT AND SUSTAINABILITY
11160237	6714362	TRUE	Dassanayake, W; Mohapatra, S; Luckert, MK; Adamowicz, W, Households' responses to climate change: contingent behavior evidence from rural South Africa, ENVIRONMENT AND DEVELOPMENT ECONOMICS
11160238	6714363	TRUE	Juhola, S; Klein, N; Kayhko, J; Neset, TSS, Climate change transformations in Nordic agriculture?, JOURNAL OF RURAL STUDIES
11160239	6714366	TRUE	Sudan, F.K.; McKay, J., Climate adaptation and governance and small-scale farmers' vulnerability through artificial glacier technology: Experiences from the cold desert of leh in North-West Himalaya, India, Managing Water Resources Under Climate Uncertainty: Examples from Asia, Europe, Latin America, and Australia
11160240	6714368	TRUE	Guodaar, L; Beni, A; Benebere, P, Using a mixed-method approach to explore the spatiality of adaptation practices of tomato farmers to climate variability in the Offinso North District, Ghana, COGENT SOCIAL SCIENCES
11160241	6714370	TRUE	Elgin-Stuczynski, IR; Batterbury, S, Perceptions of climate variability and dairy farmer adaptations in Corangamite Shire, Victoria, Australia, INTERNATIONAL JOURNAL OF CLIMATE CHANGE STRATEGIES AND MANAGEMENT
11160242	6714371	TRUE	Asadu, AN; Ozioko, RI; Dimelu, MU, Climate Change Information Source and Indigenous Adaptation Strategies of Cucumber Farmers in Enugu State, Nigeria, JOURNAL OF AGRICULTURAL EXTENSION
11160243	6714372	TRUE	Alam, K, Farmers' adaptation to water scarcity in drought-prone environments: A case study of Rajshahi District, Bangladesh, AGRICULTURAL WATER MANAGEMENT
11160244	6714373	TRUE	Fahad, S; Wang, JL, Farmers' risk perception, vulnerability, and adaptation to climate change in rural Pakistan, LAND USE POLICY
11160245	6714374	TRUE	Campos, M; Velazquez, A; McCall, M, Adaptation strategies to climatic variability: A case study of small-scale farmers in rural Mexico, LAND USE POLICY
11160276	6714375	TRUE	Sarker, MAR; Alam, K; Gow, J, Assessing the determinants of rice farmers' adaptation strategies to climate change in Bangladesh, INTERNATIONAL JOURNAL OF CLIMATE CHANGE STRATEGIES AND MANAGEMENT
11160277	6714376	TRUE	Bahinipati, CS, Determinants of farm-level adaptation diversity to cyclone and flood: insights from a farm household-level survey in Eastern India, WATER POLICY
11160278	6714377	TRUE	Quandt, A; Neufeldt, H; McCabe, JT, The role of agroforestry in building livelihood resilience to floods and drought in semiarid Kenya, ECOLOGY AND SOCIETY
11160279	6714378	TRUE	Mase, AS; Gramig, BM; Prokopy, LS, Climate change beliefs, risk perceptions, and adaptation behavior among Midwestern U.S. crop farmers, CLIMATE RISK MANAGEMENT
11160280	6714379	TRUE	Wang, YJ; Chen, XH, Understanding Farmers' Perceptions and Risk Responses to Climate Change in China, FRONTIERS OF ENGINEERING MANAGEMENT
11160281	6714380	TRUE	Sjogersten, S; Atkin, C; Clarke, ML; Mooney, SJ; Wu, B; West, HM, Responses to climate change and farming policies by rural communities in northern China: A report on field observation and farmers' perception in dryland north Shaanxi and Ningxia, LAND USE POLICY
11160282	6714384	TRUE	Keshavarz, M; Karami, E; Zibaei, M, Adaptation of Iranian farmers to climate variability and change, REGIONAL ENVIRONMENTAL CHANGE
11160283	6714385	TRUE	Arku, FS, Local creativity for adapting to climate change among rural farmers in the semi-arid region of Ghana, INTERNATIONAL JOURNAL OF CLIMATE CHANGE STRATEGIES AND MANAGEMENT
11160284	6714386	TRUE	Fujisawa, M; Kobayashi, K; Johnston, P; New, M, What Drives Farmers to Make Top-Down or Bottom-Up Adaptation to Climate Change and Fluctuations? A Comparative Study on 3 Cases of Apple Farming in Japan and South Africa, PLOS ONE
11160285	6714387	TRUE	Antonio, GJY; de Assis, RL; de Aquino, AM; Rifan, AM; Pinto, MCE, The adoption of green manure processes applied to vegetable cultivation systems in mountainous environments of Rio de Janeiro State, Brazil, OPEN AGRICULTURE
11160316	6714388	TRUE	Biggs, EM; Tompkins, EL; Allen, J; Moon, C; Allen, R, Agricultural adaptation to climate change: observations from the Mid-Hills of Nepal, CLIMATE AND DEVELOPMENT
11160317	6714389	TRUE	Krishnamurthy, L; Krishnamurthy, PK; Rajagopal, I; Solares, AP, Can agroforestry systems thrive in the drylands? Characteristics of successful agroforestry systems in the arid and semi-arid regions of Latin America, AGROFORESTRY SYSTEMS
11160318	6714390	TRUE	Zhang, Q.; Zhao, X.Y.; Wang, Y.R.; Luo, L.; Xue, B., Adaptation needs of farmers to climate change in an ecologically vulnerable alpine region: Take Gannan Plateau for example, Shengtai Xuebao Acta Ecol. Sin.
11160319	6714391	TRUE	Aryal, JP; Rahut, DB; Maharjan, S; Erenstein, O, Factors affecting the adoption of multiple climate-smart agricultural practices in the Indo-Gangetic Plains of India, NATURAL RESOURCES FORUM
11160321	6714393	TRUE	Cornish, PS; Choudhury, A; Kumar, A; Das, S; Kumbakhar, K; Norrish, S; Kumar, S, Improving crop production for food security and improved livelihoods on the East India Plateau II. Crop options, alternative cropping systems and capacity building, AGRICULTURAL SYSTEMS
11160322	6714394	TRUE	Bardsley, DK; Palazzo, E; Putz, M, Regional path dependence and climate change adaptation: A case study from the McLaren Vale, South Australia, JOURNAL OF RURAL STUDIES
11160323	6714397	TRUE	Bigelow, DP; Zhang, HL, Supplemental irrigation water rights and climate change adaptation, ECOLOGICAL ECONOMICS
11160324	6714398	TRUE	Khanal, U; Wilson, C; Hoang, VN; Lee, B, Farmers' Adaptation to Climate Change, Its Determinants and Impacts on Rice Yield in Nepal, ECOLOGICAL ECONOMICS
11160325	6714399	TRUE	Pak-Uthai, S; Faysse, N, The risk of second-best adaptive measures: Farmers facing drought in Thailand, INTERNATIONAL JOURNAL OF DISASTER RISK REDUCTION
11160386	6714400	TRUE	Spear, D; Chappel, A, Livelihoods on the Edge without a Safety Net: The Case of Smallholder Crop Farming in North-Central Namibia, LAND
11160387	6714401	TRUE	Hochman, Z; Horan, H; Reddy, DR; Sreenivas, G; Tallapragada, C; Adusumilli, R; Gaydon, D; Singh, KK; Roth, CH, Smallholder farmers managing climate risk in India: 1. Adapting to a variable climate, AGRICULTURAL SYSTEMS
11160388	6714402	TRUE	Hossain, MAR; Ahmed, M; Ojea, E; Fernandes, JA, Impacts and responses to environmental change in coastal livelihoods of south-west Bangladesh, SCIENCE OF THE TOTAL ENVIRONMENT
11160389	6714403	TRUE	Egeru, A, Climate risk management information, sources and responses in a pastoral region in East Africa, CLIMATE RISK MANAGEMENT
11160390	6714404	TRUE	Sain, G; Loboguerrero, AM; Corner-Dolloff, C; Lizarazo, M; Nowak, A; Martinez-Baron, D; Andrieu, N, Costs and benefits of climate-smart agriculture: The case of the Dry Corridor in Guatemala, AGRICULTURAL SYSTEMS
11160391	6714405	TRUE	Thornton, PK; Kristjanson, P; Forch, W; Barahona, C; Cramer, L; Pradhan, S, Is agricultural adaptation to global change in lower-income countries on track to meet the future food production challenge?, GLOBAL ENVIRONMENTAL CHANGE-HUMAN AND POLICY DIMENSIONS
11160392	6714406	TRUE	Abid, M; Ngaruiya, G; Scheffran, J; Zulfiqar, F, The Role of Social Networks in Agricultural Adaptation to Climate Change: Implications for Sustainable Agriculture in Pakistan, CLIMATE
11160393	6714408	TRUE	Amare, A; Simane, B; Nyangaga, J; Defisa, A; Hamza, D; Gurmessa, B, Index-based livestock insurance to manage climate risks in Borena zone of southern Oromia, Ethiopia, CLIMATE RISK MANAGEMENT
11160394	6714409	TRUE	Sousa-Silva, R; Ponette, Q; Verheyen, K; Van Herzele, A; Muys, B, Adaptation of forest management to climate change as perceived by forest owners and managers in Belgium, FOREST ECOSYSTEMS
11160395	6714411	TRUE	Adhikari, S, Drought Impact and Adaptation Strategies in the Mid-Hill Farming System of Western Nepal, ENVIRONMENTS
11160406	6714412	TRUE	Muriu-Ng'ang'a, FW; Mucheru-Muna, M; Waswa, F; Mairura, FS, Socio-economic factors influencing utilisation of rain water harvesting and saving technologies in Tharaka South, Eastern Kenya, AGRICULTURAL WATER MANAGEMENT
11160407	6714413	TRUE	Ali, A; Erenstein, O, Assessing farmer use of climate change adaptation practices and impacts on food security and poverty in Pakistan, CLIMATE RISK MANAGEMENT
11160408	6714414	TRUE	Williams, PA; Crespo, O; Abu, M, Adapting to changing climate through improving adaptive capacity at the local level - The case of smallholder horticultural producers in Ghana, CLIMATE RISK MANAGEMENT
11160409	6714415	TRUE	Chesterman, NS; Entwistle, J; Chambers, MC; Liu, HC; Agrawal, A; Brown, DG, The effects of trainings in soil and water conservation on farming practices, livelihoods, and land-use intensity in the Ethiopian highlands, LAND USE POLICY
11160410	6714416	TRUE	Grueneis, H; Penker, M; Hoferl, KM; Schermer, M; Scherhaufer, P, Why do we not pick the low-hanging fruit? Governing adaptation to climate change and resilience in Tyrolean mountain agriculture, LAND USE POLICY
11160412	6714417	TRUE	Kharumnuid, P; Rao, IS; Sudharani, V; Kumar, S, Farm level adaptation practices of potato growing farmers in East Khasi Hills district of Meghalaya, India, JOURNAL OF ENVIRONMENTAL BIOLOGY
11160413	6714418	TRUE	Gunathilaka, RPD; Smart, JCR; Fleming, CM, Adaptation to climate change in perennial cropping systems: Options, barriers and policy implications, ENVIRONMENTAL SCIENCE & POLICY
11160415	6714420	TRUE	Ayanlade, A; Radeny, M; Akin-Onigbinde, AI, Climate variability/change and attitude to adaptation technologies: a pilot study among selected rural farmers' communities in Nigeria, GEOJOURNAL
11160417	6714421	TRUE	Yila, J.O.; Resurreccion, B.P., Determinants of smallholder farmers' adaptation strategies to climate change in the semi arid Nguru Local Government Area, Northeastern Nigeria, Manage. Environ. Qual.
11160419	6714422	TRUE	Adhikari, SP; Timsina, KP; Lamichhane, J, Adoption and impact of rain water harvesting technology on rural livelihoods: The case of Makwanpur district, Nepal, RURAL EXTENSION AND INNOVATION SYSTEMS JOURNAL
11160466	6714423	TRUE	Neset, TS; Wirehn, L; Klein, N; Kayhko, J; Juhola, S, Maladaptation in Nordic agriculture, CLIMATE RISK MANAGEMENT
11160467	6714424	TRUE	Chukwuone, NA; Chukwuone, C; Amaechina, EC, Sustainable Land Management Practices Used by Farm Households for Climate Change Adaptation in South East Nigeria, JOURNAL OF AGRICULTURAL EXTENSION
11160468	6714425	TRUE	Helling, AP; Conner, DS; Heiss, SN; Berlin, LS, Economic Analysis of Climate Change Best Management Practices in Vermont Agriculture, AGRICULTURE-BASEL
11160469	6714426	TRUE	Lebel, L; Lebel, P; Lebel, B, Impacts, Perceptions and Management of Climate-Related Risks to Cage Aquaculture in the Reservoirs of Northern Thailand, ENVIRONMENTAL MANAGEMENT
11160471	6714428	TRUE	Varadan, RJ; Kumar, P, Indigenous knowledge about climate change: Validating the perceptions of dryland farmers in Tamil Nadu, INDIAN JOURNAL OF TRADITIONAL KNOWLEDGE
11160472	6714429	TRUE	Jin, JJ; Gao, YW; Wang, XM; Nam, PK, Farmers' risk preferences and their climate change adaptation strategies in the Yongqiao District, China, LAND USE POLICY
11160473	6714432	TRUE	Mabel, UD; Eberechukwu, NL, Indigenous Climate Change Adaptation Strategies Used by Honey Producers in Rural Commimities of Enugu State, Nigeria, JOURNAL OF AGRICULTURAL EXTENSION
11160474	6714433	TRUE	Shameem, MIM; Momtaz, S; Kiem, AS, Local perceptions of and adaptation to climate variability and change: the case of shrimp farming communities in the coastal region of Bangladesh, CLIMATIC CHANGE
11160475	6714434	TRUE	Ifeanyi-Obi, CC; Togun, AO; Lamboll, R; Arokoyu, S, Socio-Economic Determinants of Cocoyam Farmer's Strategies for Climate Change Adaptation in Southeast Nigeria, JOURNAL OF AGRICULTURAL EXTENSION
11160496	6714435	TRUE	Yila, JO; Resurreccion, BP, Gender perspectives on agricultural adaptation to climate change in drought-prone Nguru Local Government Area in the semiarid zone of northeastern Nigeria, INTERNATIONAL JOURNAL OF CLIMATE CHANGE STRATEGIES AND MANAGEMENT
11160497	6714436	TRUE	Yin, XG; Olesen, JE; Wang, M; Kersebaum, KC; Chen, H; Baby, S; Ozturk, I; Chen, F, Adapting maize production to drought in the Northeast Farming Region of China, EUROPEAN JOURNAL OF AGRONOMY
11160498	6714437	TRUE	Sereenonchai, S; Arunrat, N, Fisher's Decisions to Adopt Adaptation Strategies and Expectations for Their Children to Pursue the Same Profession in Chumphon Province, Thailand, CLIMATE
11160499	6714438	TRUE	Conevska, A; Ford, J; Lesnikowski, A; Harper, S, Adaptation financing for projects focused on food systems through the UNFCCC, CLIMATE POLICY
11160500	6714439	TRUE	Gerlicz, A.; Mndez, V.E.; Conner, D.; Baker, D.; Christel, D., Use and perceptions of alternative economic activities among smallholder coffee farmers in Huehuetenango and El Quich departments in Guatemala,
11160501	6714440	TRUE	Quandt, A; Neufeldt, H; McCabe, JT, Building livelihood resilience: what role does agroforestry play?, CLIMATE AND DEVELOPMENT
11160502	6714441	TRUE	Bedelian, C; Ogutu, JO, Trade-offs for climate-resilient pastoral livelihoods in wildlife conservancies in the Mara ecosystem, Kenya, PASTORALISM-RESEARCH POLICY AND PRACTICE
11160504	6714445	TRUE	Azumah, SB; Donkoh, SA; Ansah, IGK, Contract farming and the adoption of climate change coping and adaptation strategies in the northern region of Ghana, ENVIRONMENT DEVELOPMENT AND SUSTAINABILITY
11160505	6714447	TRUE	Awazi, N.P.; Tchamba, M.N.; Avana, T.M.-L., Climate change resiliency choices of small-scale farmers in Cameroon: determinants and policy implications,
11160536	6714448	TRUE	Wekesa, B.M.; Ayuya, O.I.; Lagat, J.K., Effect of climate-smart agricultural practices on household food security in smallholder production systems: Micro-level evidence from Kenya,
11160537	6714449	TRUE	Burnham, M; Ma, Z, Multi-Scalar Pathways to Smallholder Adaptation, WORLD DEVELOPMENT
11160538	6714451	TRUE	Meldrum, G; Mijatovic, D; Rojas, W; Flores, J; Pinto, M; Mamani, G; Condori, E; Hilaquita, D; Gruberg, H; Padulosi, S, Climate change and crop diversity: farmers' perceptions and adaptation on the Bolivian Altiplano, ENVIRONMENT DEVELOPMENT AND SUSTAINABILITY
11160539	6714452	TRUE	Menghistu, HT; Mersha, TT; Abraha, AZ, Farmers' perception of drought and its socioeconomic impact: the case of Tigray and Afar regions of Ethiopia, JOURNAL OF APPLIED ANIMAL RESEARCH
11160540	6714453	TRUE	Khan, A; Charles, A; Armitage, D, Place-based or sector-based adaptation? A case study of municipal and fishery policy integration, CLIMATE POLICY
11160541	6714454	TRUE	Partey, ST; Zougmore, RB; Ouedraogo, M; Campbell, BM, Developing climate-smart agriculture to face climate variability in West Africa: Challenges and lessons learnt, JOURNAL OF CLEANER PRODUCTION
11160542	6714455	TRUE	England, MI; Dougill, AJ; Stringer, LC; Vincent, KE; Pardoe, J; Kalaba, FK; Mkwambisi, DD; Namaganda, E; Afionis, S, Climate change adaptation and cross-sectoral policy coherence in southern Africa, REGIONAL ENVIRONMENTAL CHANGE
11160543	6714456	TRUE	Sujakhu, NM; Ranjitkar, S; Niraula, RR; Pokharel, BK; Schmidt-Vogt, D; Xu, JC, Farmers' Perceptions of and Adaptations to Changing Climate in the Melamchi Valley of Nepal, MOUNTAIN RESEARCH AND DEVELOPMENT
11160544	6714458	TRUE	Pasaribu, S.M.; Sudiyanto, A., Agricultural risk management: Lesson learned from the application of rice crop insurance in Indonesia, Clim. Chang. Policies and Chall. in Indones.
11160545	6714459	TRUE	Olawuyi, S.O.; Mushunje, A., Heterogeneous treatment effect estimation of participation in collective actions and adoption of climate-smart farming technologies in SouthÃ¢â‚¬â€œWest Nigeria,
11160576	6714460	TRUE	Ojo, T.O.; Baiyegunhi, L.J.S., Determinants of adaptation strategies to climate and its impact on rice farmers' net farm income in South-West Nigeria, Land Use Policy
11160577	6714461	TRUE	Amare, A.; Simane, B., Determinants of smallholder farmers' decision to adopt adaptation options to climate change and variability in the Muger Sub basin of the Upper Blue Nile basin of Ethiopia, Agric. Food Secur.
11160578	6714463	TRUE	Rezaei, A; Salmani, M; Razaghi, F; Keshavarz, M, An empirical analysis of effective factors on farmers adaptation behavior in water scarcity conditions in rural communities, INTERNATIONAL SOIL AND WATER CONSERVATION RESEARCH
11160579	6714464	TRUE	Delaporte, I; Maurel, M, Adaptation to climate change in Bangladesh, CLIMATE POLICY
11160580	6714465	TRUE	Nyantakyi-Frimpong, H; Matous, P; Isaac, ME, Smallholder farmers' social networks and resource-conserving agriculture in Ghana: a multicase comparison using exponential random graph models, ECOLOGY AND SOCIETY
11160581	6714466	TRUE	Mutaqin, DJ, Determinants of Farmers' Decisions on Risk Coping Strategies in Rural West Java, CLIMATE
11160582	6714469	TRUE	Landicho, LD; Paelmo, RF; Cabahug, RD; de Luna, CC; Visco, RG; Tolentino, LL, Climate Change Adaptation Strategies of Smallholder Agroforestry Farmers in the Philippines, JOURNAL OF ENVIRONMENTAL SCIENCE AND MANAGEMENT
11160583	6714470	TRUE	Bawakyillenuo, S; Yaro, JA; Teye, J, Exploring the autonomous adaptation strategies to climate change and climate variability in selected villages in the rural northern savannah zone of Ghana, LOCAL ENVIRONMENT
11160584	6714471	TRUE	Gomez, N, Climate change and adaptation on selected crops in Southern Philippines, INTERNATIONAL JOURNAL OF CLIMATE CHANGE STRATEGIES AND MANAGEMENT
11160585	6714472	TRUE	Noury, JM; Fourdin, S; Pauthenet, Y, Livestock farming systems and climate change: perception of farmers and adaptation strategies, FOURRAGES
11160606	6714474	TRUE	Nyamekye, AB; Dewulf, A; Van Slobbe, E; Termeer, K; Pinto, C, Governance arrangements and adaptive decision-making in rice farming systems in Northern Ghana, NJAS-WAGENINGEN JOURNAL OF LIFE SCIENCES
11160607	6714475	TRUE	Esham, M; Garforth, C, Agricultural adaptation to climate change: insights from a farming community in Sri Lanka, MITIGATION AND ADAPTATION STRATEGIES FOR GLOBAL CHANGE
11160608	6714477	TRUE	Akhtar, R; Masud, MM; Afroz, R, Perception of Climate Change and the Adaptation Strategies and Capacities of the Rice Farmers in Kedah, Malaysia, ENVIRONMENT AND URBANIZATION ASIA
11160610	6714478	TRUE	Cuni-Sanchez, A; Omeny, P; Pfeifer, M; Olaka, L; Mamo, MB; Marchant, R; Burgess, ND, Climate change and pastoralists: perceptions and adaptation in montane Kenya, CLIMATE AND DEVELOPMENT
11160612	6714479	TRUE	Chuang, YT, Climate variability, rainfall shocks, and farmers' income diversification in India, ECONOMICS LETTERS
11160614	6714480	TRUE	Mulyasari, G; Irham; Waluyati, LR; Suryantini, A, Perceptions and local adaptation strategies to climate change of marine capture fishermen in Bengkulu Province, Indonesia, INTERNATIONAL CONFERENCE ON CLIMATE CHANGE (ICCC 2018)
11160617	6714481	TRUE	Teklewold, H; Mekonnen, A; Kohlin, G, Climate change adaptation: a study of multiple climate-smart practices in the Nile Basin of Ethiopia, CLIMATE AND DEVELOPMENT
11160619	6714482	TRUE	Shinbrot, XA; Jones, KW; Rivera-Castaneda, A; Lopez-Baez, W; Ojima, DS, Smallholder Farmer Adoption of Climate-Related Adaptation Strategies: The Importance of Vulnerability Context, Livelihood Assets, and Climate Perceptions, ENVIRONMENTAL MANAGEMENT
11160621	6714483	TRUE	Ado, A.M.; Savadogo, P.; Pervez, A.K.M.K.; Mudimu, G.T., Farmers' perceptions and adaptation strategies to climate risks and their determinants: insights from a farming community of Aguie district in Niger,
11160622	6714484	TRUE	Okoroh, JP; Michael, OO; Edwin, MI, Climate Change Mitigation and Adaptation Strategies Used by Farmers in Imo State, Nigeria, JOURNAL OF AGRICULTURAL EXTENSION
11160642	6714485	TRUE	Abid, M; Scheffran, J; Schneider, UA; Ashfaq, M, Farmers' perceptions of and adaptation strategies to climate change and their determinants: the case of Punjab province, Pakistan, EARTH SYSTEM DYNAMICS
11160644	6714486	TRUE	Shrestha, RP; Chaweewan, N; Arunyawat, S, Adaptation to Climate Change by Rural Ethnic Communities of Northern Thailand, CLIMATE
11160645	6714487	TRUE	Evariste, FF; Jean, SD; Victor, K; Claudia, M, Assessing climate change vulnerability and local adaptation strategies in adjacent communities of the Kribi-Campo coastal ecosystems, South Cameroon, URBAN CLIMATE
11160648	6714489	TRUE	Boansi, D; Tambo, JA; Muller, M, Analysis of farmers' adaptation to weather extremes in West African Sudan Savanna, WEATHER AND CLIMATE EXTREMES
11160649	6714490	TRUE	Hou, LL; Huang, JK; Wang, JX, Early warning information, farmers' perceptions of, and adaptations to drought in China, CLIMATIC CHANGE
11160651	6714491	TRUE	Gbegbelegbe, S; Serem, J; Stirling, C; Kyazze, F; Radeny, M; Misiko, M; Tongruksawattana, S; Nafula, L; Gakii, M; Sonder, K, Smallholder farmers in eastern Africa and climate change: a review of risks and adaptation options with implications for future adaptation programmes, CLIMATE AND DEVELOPMENT
11160652	6714492	TRUE	Makate, C; Makate, M, Interceding role of institutional extension services on the livelihood impacts of drought tolerant maize technology adoption in Zimbabwe, TECHNOLOGY IN SOCIETY
11160653	6714494	TRUE	Nambi, AA; Bahinipati, CS; Raghunath, R; Nagendran, R, Farm household level adaptation metrics for agriculture and water sectors, INTERNATIONAL JOURNAL OF CLIMATE CHANGE STRATEGIES AND MANAGEMENT
11160654	6714497	TRUE	Rodriguez-Solorzano, C, Unintended outcomes of farmers' adaptation to climate variability: deforestation and conservation in Calakmul and Maya biosphere reserves, ECOLOGY AND SOCIETY
11160655	6714498	TRUE	Goswami, RK; Maiti, S; Garai, S; Jha, SK; Bhakat, M; Chandel, BS; Kadian, KS, Coping mechanisms adopted by the livestock dependents of drought prone districts of Bihar, India, INDIAN JOURNAL OF ANIMAL SCIENCES
11160676	6714499	TRUE	Tambo, JA; Wunscher, T, Enhancing resilience to climate shocks through farmer innovation: evidence from northern Ghana, REGIONAL ENVIRONMENTAL CHANGE
11160677	6714500	TRUE	Campos, M; McCall, MK; Gonzalez-Puente, M, Land-users' perceptions and adaptations to climate change in Mexico and Spain: commonalities across cultural and geographical contexts, REGIONAL ENVIRONMENTAL CHANGE
11160678	6714501	TRUE	Burchfield, EK; de la Poterie, AT, Determinants of crop diversification in rice-dominated Sri Lankan agricultural systems, JOURNAL OF RURAL STUDIES
11160679	6714503	TRUE	Wang, YJ; Huang, JK; Wang, JX, Household and Community Assets and Farmers' Adaptation to Extreme Weather Event: the Case of Drought in China, JOURNAL OF INTEGRATIVE AGRICULTURE
11160680	6714504	TRUE	Shannon, HD; Motha, RP, Managing weather and climate risks to agriculture in North America, Central America and the Caribbean, WEATHER AND CLIMATE EXTREMES
11160681	6714505	TRUE	Helmi, A; Sasaoka, M, Dealing with socioeconomic and climate-related uncertainty in small-scale salt producers in rural Sampang, Indonesia, JOURNAL OF RURAL STUDIES
11160682	6714506	TRUE	Fentie, A; Beyene, AD, Climate-smart agricultural practices and welfare of rural smallholders in Ethiopia: Does planting method matter?, LAND USE POLICY
11160683	6714507	TRUE	Anhalt-Depies, CM; Knoot, TG; Rissman, AR; Sharp, AK; Martin, KJ, Understanding Climate Adaptation on Public Lands in the Upper Midwest: Implications for Monitoring and Tracking Progress, ENVIRONMENTAL MANAGEMENT
11160684	6714508	TRUE	Rymbai, D; Sheikh, FM, The insight of agricultural adaptation to climate change: a case of rice growers in Eastern Himalaya, India, INTERNATIONAL JOURNAL OF BIOMETEOROLOGY
11160685	6714510	TRUE	Subedi, R; Bhatta, LD; Udas, E; Agrawal, NK; Joshi, KD; Panday, D, Climate-smart practices for improvement of crop yields in mid-hills of Nepal, COGENT FOOD & AGRICULTURE
11160696	6714511	TRUE	Rai, RK; Bhatta, LD; Acharya, U; Bhatta, AP, Assessing climate-resilient agriculture for smallholders, ENVIRONMENTAL DEVELOPMENT
11160697	6714512	TRUE	Antwi-Agyei, P; Stringer, LC; Dougill, AJ, Livelihood adaptations to climate variability: insights from farming households in Ghana, REGIONAL ENVIRONMENTAL CHANGE
11160698	6714513	TRUE	Valencia, V; Garcia-Barrios, L; Sterling, EJ; West, P; Meza-Jimenez, A; Naeem, S, Smallholder response to environmental change: Impacts of coffee leaf rust in a forest frontier in Mexico, LAND USE POLICY
11160699	6714514	TRUE	Alam, GMM; Alam, K; Mushtaq, S, Influence of institutional access and social capital on adaptation decision: Empirical evidence from hazard-prone rural households in Bangladesh, ECOLOGICAL ECONOMICS
11160702	6714515	TRUE	Silvestri, S; Macharia, M; Uzayisenga, B, Analysing the potential of plant clinics to boost crop protection in Rwanda through adoption of IPM: the case of maize and maize stem borers, FOOD SECURITY
11160705	6714516	TRUE	Boag, AE; Hartter, J; Hamilton, LC; Christoffersen, ND; Stevens, FR; Palace, MW; Ducey, MJ, Climate change beliefs and forest management in eastern Oregon: implications for individual adaptive capacity, ECOLOGY AND SOCIETY
11160708	6714517	TRUE	Nyaruai, MA; Musingi, JK; Wambua, BN, The potential of agroforestry as an adaptation strategy to mitigate the impacts of climate change: A case study of Kiine Community, Kenya, NUSANTARA BIOSCIENCE
11160711	6714519	TRUE	Allahyari, MS; Ghavami, S; Masuleh, ZD; Michailidis, A; Nastis, SA, Understanding Farmers' Perceptions and Adaptations to Precipitation and Temperature Variability: Evidence from Northern Iran, CLIMATE
11160714	6714520	TRUE	Begum, A.; Mahanta, R., Adaptation to climate change and factors affecting it in Assam, Indian J. Agric. Econ.
11160717	6714521	TRUE	Akinyemi, FO, Climate Change and Variability in Semiarid Palapye, Eastern Botswana: An Assessment from Smallholder Farmers' Perspective, WEATHER CLIMATE AND SOCIETY
11160735	6714523	TRUE	Joshi, B; Ji, WH; Joshi, NB, Farm households' perception on climate change and adaptation practices A case from mountain district of Nepal, INTERNATIONAL JOURNAL OF CLIMATE CHANGE STRATEGIES AND MANAGEMENT
11160737	6714525	TRUE	Feleke, FB; Berhe, M; Gebru, G; Hoag, D, Determinants of adaptation choices to climate change by sheep and goat farmers in Northern Ethiopia: the case of Southern and Central Tigray, Ethiopia, SPRINGERPLUS
11160738	6714526	TRUE	Bahinipati, CS; Venkatachalam, L, What drives farmers to adopt farm-level adaptation practices to climate extremes: Empirical evidence from Odisha, India, INTERNATIONAL JOURNAL OF DISASTER RISK REDUCTION
11160739	6714527	TRUE	MunguÃƒÂ­a-Aldama, J.; SÃƒÂ¡nchez-Plata, F.; Vizcarra-Bordi, I.; Rivas-Guevara, M., Strategies for maize production facing the impacts of climate change, Rev. Cienc. Soc.
11160740	6714528	TRUE	Kolawole, OD; Motsholapheko, MR; Ngwenya, BN; Thakadu, O; Mmopelwa, G; Kgathi, DL, Climate Variability and Rural Livelihoods: How Households Perceive and Adapt to Climatic Shocks in the Okavango Delta, Botswana, WEATHER CLIMATE AND SOCIETY
11160741	6714529	TRUE	Wu, XY; Zhang, XF; Dong, SK; Cai, H; Zhao, TR; Yang, WJ; Jiang, R; Shi, YD; Shao, JL, Local perceptions of rangeland degradation and climate change in the pastoral society of Qinghai-Tibetan Plateau, RANGELAND JOURNAL
11160742	6714530	TRUE	Yang, JP; Tan, CP; Wang, SJ; Wang, SX; Yang, Y; Chen, HJ, Drought Adaptation in the Ningxia Hui Autonomous Region, China: Actions, Planning, Pathways and Barriers, SUSTAINABILITY
11160743	6714531	TRUE	Joshi, S; Jasra, WA; Ismail, M; Shrestha, RM; Yi, SL; Wu, N, Herders' Perceptions of and Responses to Climate Change in Northern Pakistan, ENVIRONMENTAL MANAGEMENT
11160744	6714533	TRUE	Speranza, CI, Buffer capacity: capturing a dimension of resilience to climate change in African smallholder agriculture, REGIONAL ENVIRONMENTAL CHANGE
11160745	6714536	TRUE	Yegbemey, RN; Yegbemey, EO; Yabi, JA, Sustainability analysis of observed climate change adaptation strategies in maize farming in Benin, West Africa, OUTLOOK ON AGRICULTURE
11160776	6714537	TRUE	Palanisami, K; Kakumanu, KR; Ranganathan, CR; Sekhar, NU, Farm-level cost of adaptation and expected cost of uncertainty associated with climate change impacts in major river basins in India, INTERNATIONAL JOURNAL OF CLIMATE CHANGE STRATEGIES AND MANAGEMENT
11160777	6714539	TRUE	Jacobi, J; Mukhovi, S; Llanque, A; Toledo, D; Speranza, CI; Kaser, F; Augstburger, H; Delgado, JMF; Kiteme, BP; Rist, S, Actor-specific risk perceptions and strategies for resilience building in different food systems in Kenya and Bolivia, REGIONAL ENVIRONMENTAL CHANGE
11160778	6714540	TRUE	Sansen, K; Wongboon, W; Jairin, J; Kato, Y, Farmer-participatory evaluation of mechanized dry direct-seeding technology for rice in northeastern Thailand, PLANT PRODUCTION SCIENCE
11160779	6714541	TRUE	Kibue, GW; Liu, XY; Zheng, JF; Zhang, XH; Pan, GX; Li, LQ; Han, XJ, Farmers' Perceptions of Climate Variability and Factors Influencing Adaptation: Evidence from Anhui and Jiangsu, China, ENVIRONMENTAL MANAGEMENT
11160780	6714542	TRUE	Bacon, CM; Sundstrom, WA; Stewart, IT; Beezer, D, Vulnerability to Cumulative Hazards: Coping with the Coffee Leaf Rust Outbreak, Drought, and Food Insecurity in Nicaragua, WORLD DEVELOPMENT
11160781	6714544	TRUE	Tessema, YA; Joerin, J; Patt, A, Climate change as a motivating factor for farm-adjustments: Rethinking the link, CLIMATE RISK MANAGEMENT
11160782	6714545	TRUE	Somanje, A.N.; Crespo, O.; Zinyengere, N., Conservation Agriculture Among Farmers in Kalomo, Zambia: Potential for Productivity Under Climate Change, Beyond Agricultural Impacts: Multiple Perspectives on Climate Change and Agriculture in Africa
11160783	6714546	TRUE	Wang, JX; Yang, Y; Huang, JK; Adhikari, B, Adaptive irrigation measures in response to extreme weather events: empirical evidence from the North China plain, REGIONAL ENVIRONMENTAL CHANGE
11160784	6714549	TRUE	Vulturius, G; Andre, K; Swartling, AG; Brown, C; Rounsevell, MDA; Blanco, V, The relative importance of subjective and structural factors for individual adaptation to climate change by forest owners in Sweden, REGIONAL ENVIRONMENTAL CHANGE
11160812	6714551	TRUE	Imran, MA; Ali, A; Ashfaq, M; Hassan, S; Culas, R; Ma, CB, Impact of Climate Smart Agriculture (CSA) Practices on Cotton Production and Livelihood of Farmers in Punjab, Pakistan, SUSTAINABILITY
11160814	6714553	TRUE	Almaden, CRC; Rola, AC; Baconguis, RDT; Pulhin, JM; Camacho, JV; Ancog, RC, Determinants of Adaptation for Slow-Onset Hazards: The Case of Rice-Farming Households Affected by Seawater Intrusion in Northern Mindanao, Philippines, ASIAN JOURNAL OF AGRICULTURE AND DEVELOPMENT
11160816	6714554	TRUE	Ngo, Q.-T.; Nguyen, H.-R.; Nguyen, D.-T.; Doan, N.-P.; Le, V.-T.; Thai, T.H., Adaptive perception and adaptation responses to weather shocks: An adaptation deficit, Agris On-line Pap. Econ. Inf.
11160818	6714555	TRUE	Findlater, KM; Kandlikar, M; Satterfield, T, Misunderstanding conservation agriculture: Challenges in promoting, monitoring and evaluating sustainable farming, ENVIRONMENTAL SCIENCE & POLICY
11160820	6714556	TRUE	Aryal, J.P.; Jat, M.L.; Sapkota, T.B.; Rahut, D.B.; Rai, M.; Jat, H.S.; Sharma, P.C.; Stirling, C., Learning adaptation to climate change from past climate extremes:: Evidence from recent climate extremes in Haryana, India,
11160821	6714557	TRUE	Ndiritu, SW; Ruhinduka, RD, Climate variability and post-harvest food loss abatement technologies: evidence from rural Tanzania, STUDIES IN AGRICULTURAL ECONOMICS
11160822	6714558	TRUE	Lemessa, SD; Watebaji, MD; Yismaw, MA, Climate change adaptation strategies in response to food insecurity: The paradox of improved potato varieties adoption in eastern Ethiopia, COGENT FOOD & AGRICULTURE
11160823	6714559	TRUE	Chitongo, L, Rural livelihood resilience strategies in the face of harsh climatic conditions. The case of ward 11 Gwanda, South, Zimbabwe, COGENT SOCIAL SCIENCES
11160824	6714561	TRUE	Fisher, M; Snapp, S, SMALLHOLDER FARMERS' PERCEPTIONS OF DROUGHT RISK AND ADOPTION OF MODERN MAIZE IN SOUTHERN MALAWI, EXPERIMENTAL AGRICULTURE
11160825	6714564	TRUE	Wiederkehr, C; Beckmann, M; Hermans, K, Environmental change, adaptation strategies and the relevance of migration in Sub-Saharan drylands, ENVIRONMENTAL RESEARCH LETTERS
11160836	6714565	TRUE	Moroda, GT; Tolossa, D; Semie, N, Perception and adaptation strategies of rural people against the adverse effects of climate variability: A case study of Boset District, East Shewa, Ethiopia, ENVIRONMENTAL DEVELOPMENT
11160839	6714567	TRUE	Singh, NP; Anand, B; Khan, MA, Micro-level perception to climate change and adaptation issues: A prelude to mainstreaming climate adaptation into developmental landscape in India, NATURAL HAZARDS
11160841	6714568	TRUE	Wang, YJ; Chen, XH, Are farmers' adaptations enhancing food production? Evidence from China, REGIONAL ENVIRONMENTAL CHANGE
11160843	6714569	TRUE	Hussain, A; Rasul, G; Mahapatra, B; Wahid, S; Tuladhar, S, Climate change-induced hazards and local adaptations in agriculture: a study from Koshi River Basin, Nepal, NATURAL HAZARDS
11160845	6714571	TRUE	Jin, JJ; Wang, WY; Wang, XM, Adapting agriculture to the drought hazard in rural China: household strategies and determinants, NATURAL HAZARDS
11160848	6714574	TRUE	Simelton, E; Dam, BV; Catacutan, D, Trees and agroforestry for coping with extreme weather events: experiences from northern and central Viet Nam, AGROFORESTRY SYSTEMS
11160852	6714577	TRUE	Fuchs, LE; Orero, L; Namoi, N; Neufeldt, H, How to Effectively Enhance Sustainable Livelihoods in Smallholder Systems: A Comparative Study from Western Kenya, SUSTAINABILITY
11160854	6714578	TRUE	Haji, J; Legesse, B, Impact of sedentarization program on the livelihood and food security of Ethiopian pastoralists, JOURNAL OF ARID ENVIRONMENTS
11160866	6714579	TRUE	Taraz, V, Adaptation to climate change: historical evidence from the Indian monsoon, ENVIRONMENT AND DEVELOPMENT ECONOMICS
11160867	6714580	TRUE	de Jalon, SG; Iglesias, A; Neumann, MB, Responses of sub-Saharan smallholders to climate change: Strategies and drivers of adaptation, ENVIRONMENTAL SCIENCE & POLICY
11160868	6714581	TRUE	Mishra, AK; Pede, VO; Barboza, GA, Perception of Climate Change and Impact on Land Allocation and Income: Empirical Evidence from Vietnam's Delta Region, AGRICULTURAL AND RESOURCE ECONOMICS REVIEW
11160869	6714582	TRUE	Prasain, S, Climate change adaptation measure on agricultural communities of Dhye in Upper Mustang, Nepal, CLIMATIC CHANGE
11160870	6714585	TRUE	Tabbo, AM; Amadou, Z, Assessing newly introduced climate change adaptation strategy packages among rural households: Evidence from Kaou local government area, Tahoua State, Niger Republic, JAMBA-JOURNAL OF DISASTER RISK STUDIES
11160871	6714586	TRUE	Mugambiwa, SS, Adaptation measures to sustain indigenous practices and the use of indigenous knowledge systems to adapt to climate change in Mutoko rural district of Zimbabwe, JAMBA-JOURNAL OF DISASTER RISK STUDIES
11160872	6714587	TRUE	Osei, S., Climate change adaptation constraints among smallholder farmers in rural households of central region of Ghana, West Afr. J. Appl. Ecol.
11160873	6714588	TRUE	Chen, H; Wang, JX; Huang, JK, Policy support, social capital, and farmers' adaptation to drought in China, GLOBAL ENVIRONMENTAL CHANGE-HUMAN AND POLICY DIMENSIONS
11160874	6714590	TRUE	Wako, G.; Tadesse, M.; Angassa, A., Camel management as an adaptive strategy to climate change by pastoralists in southern Ethiopia, Ecol. Processes
11160875	6714592	TRUE	Choudri, BS; Al-Busaidi, A; Ahmed, M, Climate change, vulnerability and adaptation experiences of farmers in Al-Suwayq Wilayat, Sultanate of Oman, INTERNATIONAL JOURNAL OF CLIMATE CHANGE STRATEGIES AND MANAGEMENT
11160886	6714593	TRUE	Lawanson, T.; Orelaja, O.; Simire, M., Effects of climate change on a peri-urban farming community in Lagos, Nigeria, Afr. J. Sci. Technol. Innov. Dev.
11160888	6714596	TRUE	Waha, K; van Wijk, MT; Fritz, S; See, L; Thornton, PK; Wichern, J; Herrero, M, Agricultural diversification as an important strategy for achieving food security in Africa, GLOBAL CHANGE BIOLOGY
11160889	6714598	TRUE	Oladele, OI; Gitika, MP; Ngari, F; Shimeles, A; Mamo, G; Aregawi, F; Braimoh, AK; Olorunfemi, OD, Adoption of agro-weather information sources for climate smart agriculture among farmers in Embu and Ada'a districts of Kenya and Ethiopia, INFORMATION DEVELOPMENT
11160890	6714599	TRUE	Galappaththi, Eranga K; Ford, James D; Bennett, Elena M; Berkes, Fikret, Climate change and community fisheries in the arctic: A case study from Pangnirtung, Canada.,
11160891	6714600	TRUE	Thoai, TQ; Ranola, RF; Camacho, LD; Simelton, E, Determinants of farmers' adaptation to climate change in agricultural production in the central region of Vietnam, LAND USE POLICY
11160893	6714602	TRUE	Raghavendra, KJ; Suresh, A, Risk management in rainfed agriculture: An analysis of strategies and adaptations followed by farmers in Madhya Pradesh, INDIAN JOURNAL OF AGRICULTURAL SCIENCES
11160894	6714603	TRUE	Liu, K; Huisingh, D; Zhu, JM; Ma, Y; O'Connor, D; Hou, DY, Farmers' perceptions and adaptation behaviours concerning land degradation: A theoretical framework and a case-study in the Qinghai-Tibetan Plateau of China, LAND DEGRADATION & DEVELOPMENT
11160895	6714604	TRUE	Wangui, EE; Smucker, TA, Gendered opportunities and constraints to scaling up: a case study of spontaneous adaptation in a pastoralist community in Mwanga District, Tanzania, CLIMATE AND DEVELOPMENT
11160936	6714605	TRUE	de Sousa, K; Casanoves, F; Sellare, J; Ospina, A; Suchini, JG; Aguilar, A; Mercado, L, How climate awareness influences farmers' adaptation decisions in Central America?, JOURNAL OF RURAL STUDIES
11160937	6714606	TRUE	Shaffril, HAM; Krauss, SE; Samsuddin, SF, A systematic review on Asian's farmers' adaptation practices towards climate change, SCIENCE OF THE TOTAL ENVIRONMENT
11160939	6714608	TRUE	Tumusiime, D.; Nalule, A.S.; Nalubwama, S., Paradigm shifts in rangeland communities' livelihoods activities as coping strategies to climate variability and restricted mobility, Livest. Res. Rural Dev.
11160940	6714609	TRUE	Mardy, T; Uddin, MN; Sarker, MA; Roy, D; Dunn, ES, Assessing Coping Strategies in Response to Drought: A Micro Level Study in the North-West Region of Bangladesh, CLIMATE
11160941	6714611	TRUE	Murungweni, C; van Wijk, MT; Giller, KE; Andersson, JA; Smaling, EMA, Adaptive livelihood strategies employed by farmers to close the food gap in semi-arid south eastern Zimbabwe, FOOD SECURITY
11160942	6714612	TRUE	Brussow, K; Fasse, A; Grote, U, Implications of climate-smart strategy adoption by farm households for food security in Tanzania, FOOD SECURITY
11160943	6714613	TRUE	Ayanlade, A; Radeny, M; Morton, JF, Comparing smallholder farmers' perception of climate change with meteorological data: A case study from southwestern Nigeria, WEATHER AND CLIMATE EXTREMES
11160944	6714614	TRUE	Turbay, S.; Nates, B.; Jaramillo, F.; Vlez, J.J.; Ocampo, O.L., Adaptation to climate variability among the coffee farmers of the watersheds of the rivers Porce and ChinchinÃƒÂ¡, Colombia, Invest. Geogr.
11160945	6714615	TRUE	Ndamani, F; Watanabe, T, Farmers' Perceptions about Adaptation Practices to Climate Change and Barriers to Adaptation: A Micro-Level Study in Ghana, WATER
11160966	6714616	TRUE	Fujisawa, M; Kobayashi, K, Shifting from apple to peach farming in Kazuno, northern Japan: perceptions of and responses to climatic and non-climatic impacts, REGIONAL ENVIRONMENTAL CHANGE
11160967	6714617	TRUE	Bangura, KS; Lynch, K; Binns, JA, Coping with the impacts of weather changes in rural Sierra Leone, INTERNATIONAL JOURNAL OF SUSTAINABLE DEVELOPMENT AND WORLD ECOLOGY
11160968	6714618	TRUE	Rahut, DB; Ali, A, Coping with climate change and its impact on productivity, income, and poverty: Evidence from the Himalayan region of Pakistan, INTERNATIONAL JOURNAL OF DISASTER RISK REDUCTION
11160969	6714620	TRUE	Utami, AW; Cramer, LA; Rosenberger, N, Staple Food Diversification Versus Raskin: Developing Climate Change Resilience in Rural Indonesia, HUMAN ORGANIZATION
11160970	6714621	TRUE	Shumetie, A; Yismaw, MA, Effect of climate variability on crop income and indigenous adaptation strategies of households, INTERNATIONAL JOURNAL OF CLIMATE CHANGE STRATEGIES AND MANAGEMENT
11160971	6714622	TRUE	Baudoin, MA; Sanchez, AC; Fandohan, B, Small scale farmers' vulnerability to climatic changes in southern Benin: the importance of farmers' perceptions of existing institutions, MITIGATION AND ADAPTATION STRATEGIES FOR GLOBAL CHANGE
11160972	6714623	TRUE	Jibrillah, AM; Jaafar, M; Choy, LK, Climate Change Awareness and Adaptations Among the Farming and Animal Rearing Communities of the Central Sokoto Close-Settle Zone, North-Western Nigeria, JURNAL KEJURUTERAAN
11160973	6714626	TRUE	Ouedraogo, M; Zougmore, R; Moussa, AS; Partey, ST; Thornton, PK; Kristjanson, P; Ndour, NYB; Some, L; Naab, J; Boureima, M; Diakite, L; Quiros, C, Markets and climate are driving rapid change in farming practices in Savannah West Africa, REGIONAL ENVIRONMENTAL CHANGE
11160974	6714627	TRUE	Kakumanu, KR; Kotapati, GR; Nagothu, US; Kuppanan, P; Kallam, SR, Adaptation to climate change and variability: a case of direct seeded rice in Andhra Pradesh, India, JOURNAL OF WATER AND CLIMATE CHANGE
11160975	6714628	TRUE	Kosmowski, F, Soil water management practices (terraces) helped to mitigate the 2015 drought in Ethiopia, AGRICULTURAL WATER MANAGEMENT
11160986	6714629	TRUE	Utete, B; Phiri, C; Mlambo, SS; Muboko, N; Fregene, BT, Vulnerability of fisherfolks and their perceptions towards climate change and its impacts on their livelihoods in a peri-urban lake system in Zimbabwe, ENVIRONMENT DEVELOPMENT AND SUSTAINABILITY
11160987	6714630	TRUE	Morton, LW; McGuire, JM; Cast, AD, A good farmer pays attention to the weather, CLIMATE RISK MANAGEMENT
11160988	6714632	TRUE	Kpadonou, RAB; Owiyo, T; Barbier, B; Denton, F; Rutabingwa, F; Kiemad, A, Advancing climate-smart-agriculture in developing drylands: Joint analysis of the adoption of multiple on-farm soil and water conservation technologies in West African Sahel, LAND USE POLICY
11160989	6714635	TRUE	Kant, K; Sankhala, G; Prasad, K; Kadian, KS, Adaptation practices followed by dairy farmers under adverse climatic conditions in western dry region of India, INDIAN JOURNAL OF ANIMAL SCIENCES
11160990	6714636	TRUE	Ali, J., Adoption of Diversification for Risk Management in Vegetable Cultivation, Int. J. Vegetable Sci.
11160991	6714637	TRUE	Biglari, T.; Maleksaeidi, H.; Eskandari, F.; Jalali, M., Livestock insurance as a mechanism for household resilience of livestock herders to climate change: Evidence from Iran,
11160992	6714638	TRUE	Abi, M; Kessler, A; Oosterveer, P; Tolossa, D, Adapting the current mass mobilization approach in Ethiopia to enhance its impact on sustainable land management: Lessons from the Sago-kara watershed, JOURNAL OF ENVIRONMENTAL MANAGEMENT
11160993	6714639	TRUE	Chedid, M; Tourrand, JF; Jaber, LS; Hamadeh, SK, Farmers' perception to change and adaptation strategies of small ruminant systems in the West Bekaa of Lebanon, SMALL RUMINANT RESEARCH
11160994	6714640	TRUE	Abid, M; Scheffran, J; Schneider, UA; Elahi, E, Farmer Perceptions of Climate Change, Observed Trends and Adaptation of Agriculture in Pakistan, ENVIRONMENTAL MANAGEMENT
11160995	6714641	TRUE	Mupakati, T; Tanyanyiwa, VI, Cassava production as a climate change adaptation strategy in Chilonga Ward, Chiredzi District, Zimbabwe, JAMBA-JOURNAL OF DISASTER RISK STUDIES
11161012	6714642	TRUE	Abarike, AM; Yeboah, RWN; Dzomeku, IK, Strategies of Farmers in the Bawku West District of Ghana to Mitigate the Impacts of Climate Variability on Farming, STRATEGIES FOR BUILDING RESILIENCE AGAINST CLIMATE AND ECOSYSTEM CHANGES IN SUB-SAHARAN AFRICA
11161013	6714643	TRUE	Rusdiyana, E; Suminah, An adaptation strategy of sandland peasants in Yogyakarta toward climate change, INTERNATIONAL CONFERENCE ON CLIMATE CHANGE: CHALLENGES AND OPPORTUNITY ON ENVIRONMENT DEGRADATION RESEARCHES
11161014	6714644	TRUE	Diehl, KE; Bachinger, J; Hamadeh, SK, Requisite variety in adaptation strategies: case studies from two regions prone to climate change, Brandenburg, Germany and semi-arid Bekaa, Lebanon, AGRICULTURE AND CLIMATE CHANGE - ADAPTING CROPS TO INCREASED UNCERTAINTY (AGRI 2015)
11161015	6714646	TRUE	Tripathi, A; Mishra, AK, Knowledge and passive adaptation to climate change: An example from Indian farmers, CLIMATE RISK MANAGEMENT
11161016	6714647	TRUE	Sugihardjo; Sutrisno, J; Setyono, P; Suntoro, Dynamic models of farmers adaptation to climate change (case of rice farmers in Cemoro Watershed, Central Java, Indonesia), 4TH INTERNATIONAL CONFERENCE ON SUSTAINABLE AGRICULTURE AND ENVIRONMENT (4TH ICSAE)
11161017	6714650	TRUE	Cavanagh, CJ; Chemarum, AK; Vedeld, PO; Petursson, JG, Old wine, new bottles? Investigating the differential adoption of 'climate-smart' agricultural practices in western Kenya, JOURNAL OF RURAL STUDIES
11161018	6714652	TRUE	Kakumanu, KR; Kaluvai, YR; Balasubramanian, M; Nagothu, US; Kotapati, GR; Karanam, S, ADAPTATION TO CLIMATE CHANGE: IMPACT OF CAPACITY BUILDING, INDIA, IRRIGATION AND DRAINAGE
11161019	6714653	TRUE	Ferchichi, I; Marlet, S; Zairi, A, How Farmers Deal with Water Scarcity in Community-Managed Irrigation SYSTEMS: A Case Study in Northern Tunisia, IRRIGATION AND DRAINAGE
11161020	6714654	TRUE	Poudel, DD; Duex, TW, Vanishing Springs in Nepalese Mountains Assessment of Water Sources, Farmers' Perceptions, and Climate Change Adaptation, MOUNTAIN RESEARCH AND DEVELOPMENT
11161021	6714655	TRUE	Alemayehu, A; Bewket, W, Trees and rural households' adaptation to local environmental change in the central highlands of Ethiopia, JOURNAL OF LAND USE SCIENCE
11161052	6714657	TRUE	Wang, J; Wang, Y; Li, SC; Qin, DH, Climate adaptation, institutional change, and sustainable livelihoods of herder communities in northern Tibet, ECOLOGY AND SOCIETY
11161053	6714658	TRUE	Alvarez-Berrios, NL; Soto-Bayo, S; Holupchinski, E; Fain, SJ; Gould, WA, Correlating drought conservation practices and drought vulnerability in a tropical agricultural system, RENEWABLE AGRICULTURE AND FOOD SYSTEMS
11161054	6714659	TRUE	Eludoyin, AO; Nevo, AO; Abuloye, PA; Eludoyin, OM; Awotoye, OO, Climate Events and Impact on Cropping Activities of Small-Scale Farmers in a Part of Southwest Nigeria, WEATHER CLIMATE AND SOCIETY
11161056	6714661	TRUE	Makate, C; Makate, M; Mango, N; Siziba, S, Increasing resilience of smallholder farmers to climate change through multiple adoption of proven climate-smart agriculture innovations. Lessons from Southern Africa, JOURNAL OF ENVIRONMENTAL MANAGEMENT
11161057	6714664	TRUE	Younus, MAF, Crop adaptation processes to extreme floods in Bangladesh: a case study, ENVIRONMENTAL HAZARDS-HUMAN AND POLICY DIMENSIONS
11161058	6714665	TRUE	Malakar, K; Mishra, T; Patwardhan, A, Factors linked with adaptation in the Indian marine fishing community, OCEAN & COASTAL MANAGEMENT
11161060	6714667	TRUE	Makate, C; Wang, RC; Makate, M; Mango, N, Impact of drought tolerant maize adoption on maize productivity, sales and consumption in rural Zimbabwe, AGREKON
11161061	6714670	TRUE	Zhai, SY; Song, GX; Qin, YC; Ye, XY; Leipnik, M, Climate change and Chinese farmers: Perceptions and determinants of adaptive strategies, JOURNAL OF INTEGRATIVE AGRICULTURE
11161082	6714671	TRUE	Takakura, H, Limits of pastoral adaptation to permafrost regions caused by climate change among the Sakha people in the middle basin of Lena River, POLAR SCIENCE
11161083	6714673	TRUE	Wood, SA; Jina, AS; Jain, M; Kristjanson, P; DeFries, RS, Smallholder farmer cropping decisions related to climate variability across multiple regions, GLOBAL ENVIRONMENTAL CHANGE-HUMAN AND POLICY DIMENSIONS
11161084	6714674	TRUE	Lei, YD; Liu, CC; Zhang, LB; Luo, SH, How smallholder farmers adapt to agricultural drought in a changing climate: A case study in southern China, LAND USE POLICY
11161085	6714677	TRUE	Kattumuri, R; Ravindranath, D; Esteves, T, Local adaptation strategies in semi-arid regions: study of two villages in Karnataka, India, CLIMATE AND DEVELOPMENT
11161086	6714679	TRUE	Williams, NE; Carrico, A, Examining adaptations to water stress among farming households in Sri Lanka's dry zone, AMBIO
11161087	6714680	TRUE	Jin, JJ; Wang, XM; Gao, YW, Gender differences in farmers' responses to climate change adaptation in Yongqiao District, China, SCIENCE OF THE TOTAL ENVIRONMENT
11161088	6714682	TRUE	Warner, BP; Kuzdas, C; Yglesias, MG; Childers, DL, Limits to adaptation to interacting global change risks among smallholder rice farmers in Northwest Costa Rica, GLOBAL ENVIRONMENTAL CHANGE-HUMAN AND POLICY DIMENSIONS
11161089	6714683	TRUE	Bulla, B; Steelman, T, Farming through change: using photovoice to explore climate change on small family farms, AGROECOLOGY AND SUSTAINABLE FOOD SYSTEMS
11161090	6714684	TRUE	Defiesta, G; Rapera, CL, Measuring Adaptive Capacity of Farmers to Climate Change and Variability: Application of a Composite Index to an Agricultural Community in the Philippines, JOURNAL OF ENVIRONMENTAL SCIENCE AND MANAGEMENT
11161091	6714686	TRUE	Lawson, E.T.; Alare, R.S.; Salifu, A.R.Z.; Thompson-Hall, M., Dealing with climate change in semi-arid Ghana: understanding intersectional perceptions and adaptation strategies of women farmers,
11161114	6714687	TRUE	Alhassan, S.I.; Shaibu, M.T.; Kuwornu, J.K.M.; Damba, O.T., Factors influencing farmers' awareness and choice of indigenous practices in adapting to climate change and variability in Northern Ghana,
11161117	6714688	TRUE	Kumasi, TC; Antwi-Agyei, P; Obiri-Danso, K, Small-holder farmers' climate change adaptation practices in the Upper East Region of Ghana, ENVIRONMENT DEVELOPMENT AND SUSTAINABILITY
11161120	6714689	TRUE	Khanal, U; Wilson, C; Hoang, VN; Lee, B, Impact of community-based organizations on climate change adaptation in agriculture: empirical evidence from Nepal, ENVIRONMENT DEVELOPMENT AND SUSTAINABILITY
11161123	6714690	TRUE	Pandey, SS; Cockfield, G; Maraseni, TN, Assessing the roles of community forestry in climate change mitigation and adaptation: A case study from Nepal, FOREST ECOLOGY AND MANAGEMENT
11161125	6714692	TRUE	McCord, PF; Cox, M; Schmitt-Harsh, M; Evans, T, Crop diversification as a smallholder livelihood strategy within semi-arid agricultural systems near Mount Kenya, LAND USE POLICY
11161126	6714695	TRUE	Stefanovic, J.O.; Yang, H.; Zhou, Y.; Kamali, B.; Ogalleh, S.A., Adaption to climate change: a case study of two agricultural systems from Kenya, CLIMATE AND DEVELOPMENT
11159628	6714696	TRUE	Yung, L; Phear, N; DuPont, A; Montag, J; Murphy, D, Drought Adaptation and Climate Change Beliefs among Working Ranchers in Montana, WEATHER CLIMATE AND SOCIETY
11159631	6714697	TRUE	Qaisrani, A.; Umar, M.A.; Siyal, G.E.A.; Salik, K.M., What Defines Livelihood Vulnerability in Rural Semi-Arid Areas? Evidence from Pakistan,
11159635	6714698	TRUE	Kassian, LM; Tenywa, M; Liwenga, ET; Dyer, KW; Bamutaze, Y, Implication of climate change and variability on stream flow in Iringa region, Tanzania, JOURNAL OF WATER AND CLIMATE CHANGE
11159639	6714699	TRUE	Adeleke, M.L.; Al-Kenawy, D.; Nasr-Allah, A.M.; Murphy, S.; El-Naggar, G.O.; Dickson, M., Fish farmers' perceptions, impacts and adaptation on/of/to climate change in Africa (the case of Egypt and Nigeria),
11159645	6714701	TRUE	Nettle, R; Kuehne, G; Lee, K; Armstrong, D, A new framework to analyse workforce contribution to Australian cotton farm adaptability, AGRONOMY FOR SUSTAINABLE DEVELOPMENT
11159649	6714702	TRUE	Brocke, KV; Trouche, G; Weltzien, E; Kondombo-Barro, CP; Sidibe, A; Zougmore, R; Goze, E, HELPING FARMERS ADAPT TO CLIMATE AND CROPPING SYSTEM CHANGE THROUGH INCREASED ACCESS TO SORGHUM GENETIC RESOURCES ADAPTED TO PREVALENT SORGHUM CROPPING SYSTEMS IN BURKINA FASO, EXPERIMENTAL AGRICULTURE
11159653	6714703	TRUE	Schattman, RE; Conner, D; Mendez, VE, Farmer perceptions of climate change risk and associated on-farm management strategies in Vermont, northeastern United States, ELEMENTA-SCIENCE OF THE ANTHROPOCENE
11159658	6714704	TRUE	Dey, T; Pala, NA; Shukla, G; Pal, PK; Das, G; Chakarvarty, S, Climate change perceptions and response strategies of forest fringe communities in Indian Eastern Himalaya, ENVIRONMENT DEVELOPMENT AND SUSTAINABILITY
11159660	6714705	TRUE	de Matos Carlos, S.; da Cunha, D.A.; Pires, M.V.; do Couto-Santos, F.R., Understanding farmers' perceptions and adaptation to climate change: the case of Rio das Contas basin, Brazil,
11159664	6714706	TRUE	Stoilova, T; van Zonneveld, M; Roothaert, R; Schreinemachers, P, Connecting genebanks to farmers in East Africa through the distribution of vegetable seed kits, PLANT GENETIC RESOURCES-CHARACTERIZATION AND UTILIZATION
11159666	6714707	TRUE	Gorst, A; Dehlavi, A; Groom, B, Crop productivity and adaptation to climate change in Pakistan, ENVIRONMENT AND DEVELOPMENT ECONOMICS
11159667	6714709	TRUE	Penet, L; Barthe, E; Alleyne, A; Blazy, JM, Disease risk perception and diversity of management strategies by farmers: The case of anthracnose caused by Colletotrichum gloeosporioides on water yams (Dioscorea alata) in Guadeloupe, CROP PROTECTION
11159668	6714711	TRUE	Schattman, RE; Mendez, VE; Merrill, SC; Zia, A, Mixed methods approach to understanding farmer and agricultural advisor perceptions of climate change and adaptation in Vermont, United States, AGROECOLOGY AND SUSTAINABLE FOOD SYSTEMS
11159669	6714712	TRUE	Lennox, E; Gowdy, J, Ecosystem governance in a highland village in Peru: Facing the challenges of globalization and climate change, ECOSYSTEM SERVICES
11159670	6714713	TRUE	Ullah, R.; Shah, J., Economic costs of managing climatic risks in agriculture: Evidences from Khyber Pakhtunkhwa Province of Pakistan,
11159672	6714716	TRUE	Tunde, A.M.; Ajadi, B.S., Indigenous understanding of climate change, impacts and coping strategies in a rural setting of Kwara State, Nigeria,
11159673	6714718	TRUE	Fischer, AP, Adapting and coping with climate change in temperate forests, GLOBAL ENVIRONMENTAL CHANGE-HUMAN AND POLICY DIMENSIONS
11159674	6714720	TRUE	Ho, TT; Shimada, K, The Effects of Climate Smart Agriculture and Climate Change Adaptation on the Technical Efficiency of Rice FarmingAn Empirical Study in the Mekong Delta of Vietnam, AGRICULTURE-BASEL
11159675	6714721	TRUE	Kabir, MJ; Cramb, R; Alauddin, M; Gaydon, DS, Farmers' perceptions and management of risk in rice-based farming systems of south-west coastal Bangladesh, LAND USE POLICY
11159716	6714722	TRUE	Viguera, B; Alpizar, F; Harvey, CA; Martinez-Rodriguez, MR; Saborio-Rodriguez, M, Climate change perceptions and adaptive responses of small-scale coffee farmers in Costa Rica, AGRONOMIA MESOAMERICANA
11159717	6714723	TRUE	Tang, LQ; Zhou, JH; Bobojonov, I; Zhang, YJ; Glauben, T, Induce or reduce? The crowding-in effects of farmers' perceptions of climate risk on chemical use in China, CLIMATE RISK MANAGEMENT
11159718	6714724	TRUE	Penalba, EH, Adaptation to Climate Change among Farmers in Bulacan, Philippines, JOURNAL OF RURAL AND COMMUNITY DEVELOPMENT
11159719	6714727	TRUE	Mitter, H; Larcher, M; Schonhart, M; Stottinger, M; Schmid, E, Exploring Farmers' Climate Change Perceptions and Adaptation Intentions: Empirical Evidence from Austria, ENVIRONMENTAL MANAGEMENT
11159720	6714728	TRUE	Tessema, YA; Joerin, J; Patt, A, Crop switching as an adaptation strategy to climate change: the case of Semien Shewa Zone of Ethiopia, INTERNATIONAL JOURNAL OF CLIMATE CHANGE STRATEGIES AND MANAGEMENT
11159721	6714731	TRUE	Below, TB; Schmid, JC; Sieber, S, Farmers' knowledge and perception of climatic risks and options for climate change adaptation: a case study from two Tanzanian villages, REGIONAL ENVIRONMENTAL CHANGE
11159722	6714732	TRUE	Osano, PM; Said, MY; de Leeuw, J; Moiko, SS; Kaelo, DO; Schomers, S; Birner, R; Ogutu, JO, Pastoralism and ecosystem-based adaptation in Kenyan Masailand, INTERNATIONAL JOURNAL OF CLIMATE CHANGE STRATEGIES AND MANAGEMENT
11159723	6714733	TRUE	Zulfiqar, F; Ullah, R; Abid, M; Hussain, A, Cotton production under risk: a simultaneous adoption of risk coping tools, NATURAL HAZARDS
11159724	6714734	TRUE	Parameswaranaik, J; Kumar, RS; Bhawar, RS; Darshan, NP; Patel, D, Factors influencing adaptation strategies by livestock owners to combat climate variability in Karnataka state: Application of ordered logistic regression model, INDIAN JOURNAL OF ANIMAL SCIENCES
11159725	6714736	TRUE	Wang, SW; Lee, WK; Son, Y, An assessment of climate change impacts and adaptation in South Asian agriculture, INTERNATIONAL JOURNAL OF CLIMATE CHANGE STRATEGIES AND MANAGEMENT
11159746	6714737	TRUE	Mesquita, PS; Bursztyn, M, Food acquisition programs in the Brazilian semi-arid region: benefits to farmers and impacts of climate change, FOOD SECURITY
11159748	6714739	TRUE	Bhatasara, S, Towards a Sociology of Adaptation to Rainfall Variability in Rural Zimbabwe: The Case of Charewa in Mutoko, FUDAN JOURNAL OF THE HUMANITIES AND SOCIAL SCIENCES
11159749	6714740	TRUE	Diem, JE; Hartter, J; Salerno, J; McIntyre, E; Grandy, AS, Comparison of measured multi-decadal rainfall variability with farmers' perceptions of and responses to seasonal changes in western Uganda, REGIONAL ENVIRONMENTAL CHANGE
11159750	6714743	TRUE	Dhakal, S; Sedhain, GK; Dhakal, SC, Climate Change Impact and Adaptation Practices in Agriculture: A Case Study of Rautahat District, Nepal, CLIMATE
11159751	6714744	TRUE	Bate, BG; Kimengsi, JN; Amawa, SG, Determinants and Policy Implications of Farmers' Climate Adaptation Choices in Rural Cameroon, SUSTAINABILITY
11159752	6714746	TRUE	Patnaik, U; Das, PK; Bahinipati, CS, Development interventions, adaptation decisions and farmers' well-being: evidence from drought-prone households in rural India, CLIMATE AND DEVELOPMENT
11159754	6714748	TRUE	Khan, FN; Collins, AM; Nayak, PK; Armitage, D, Women's perspectives of small-scale fisheries and environmental change in Chilika lagoon, India, MARITIME STUDIES
11159755	6714749	TRUE	Arfanuzzaman, M.; Mamnun, N.; Islam, M.S.; Dilshad, T.; Syed, M.A., Evaluation of adaptation practices in the agriculture sector of Bangladesh: An ecosystem based assessment, Clim.
11159786	6714752	TRUE	Macon, D.K.; Barry, S.; Becchetti, T.; Davy, J.S.; Doran, M.P.; Finzel, J.A.; George, H.; Harper, J.M.; Huntsinger, L.; Ingram, R.S.; Lancaster, D.E.; Larsen, R.E.; Lewis, D.J.; Lile, D.F.; McDougald, N.K.; Mashiri, F.E.; Nader, G.; Oneto, S.R.; Stackhouse, J.W.; Roche, L.M., Coping With Drought on California Rangelands, Rangelands
11159787	6714755	TRUE	Viguera, B; Alpizar, F; Harvey, CA; Martinez-Rodriguez, MR; Saborio-Rodriguez, M; Contreras, L, Climate change perceptions and adaptive responses of small-scale farmers in two Guatemalan landscapes, AGRONOMIA MESOAMERICANA
11159788	6714756	TRUE	Islam, MA; Akber, MA; Ahmed, M; Rahman, MM; Rahman, MR, Climate change adaptations of shrimp farmers: a case study from southwest coastal Bangladesh, CLIMATE AND DEVELOPMENT
11159789	6714757	TRUE	Dembele, YM; Akinbile, LA; Aminu, OO, Adaptation Strategies to Climate Change among Cereal Crop Farmers in Kita, Kayes Region of Mali, JOURNAL OF AGRICULTURAL EXTENSION
11159790	6714758	TRUE	Khatri-Chhetri, A; Aggarwal, PK; Joshi, PK; Vyas, S, Farmers' prioritization of climate-smart agriculture (CSA) technologies, AGRICULTURAL SYSTEMS
11159791	6714760	TRUE	Premarathne, NMKC; Dissanayake, STM; De Silva, S; Weerathunga, US; Kumara, TVP, Impact of Changed Rainfall Patterns Due to Climate Change and Usage of Available Weather Information by Communities Who Face Human Elephant Conflict (HEC) in Udawalawe, Sri Lanka, CONFERENCE PROCEEDINGS OF THE INTERNATIONAL CONFERENCE ON CLIMATE CHANGE - 2017 (ICCC 2017)
11159792	6714761	TRUE	Lalou, R; Sultan, B; Muller, B; Ndonky, A, Does climate opportunity facilitate smallholder farmers' adaptive capacity in the Sahel?, PALGRAVE COMMUNICATIONS
11159793	6714763	TRUE	Akhtar, S; Li, GC; Nazir, A; Razzaq, A; Ullah, R; Faisal, M; Naseer, MAUR; Raza, MH, Maize production under risk: The simultaneous adoption of off-farm income diversification and agricultural credit to manage risk, JOURNAL OF INTEGRATIVE AGRICULTURE
11159794	6714764	TRUE	Islam, MS; Hossain, MZ; Sikder, MB, Drought adaptation measures and their effectiveness at Barind Tract in northwest Bangladesh: a perception study, NATURAL HAZARDS
11159795	6714767	TRUE	Shi, X.; Sun, L.; Chen, X.; Wang, L., Farmers' perceived efficacy of adaptive behaviors to climate change in the Loess Plateau, China,
11159806	6714769	TRUE	Hoang, MH; Namirembe, S; van Noordwijk, M; Catacutan, D; Oborn, I; Ouml;born, I; Perez-Teran, AS; Nguyen, HQ; Dumas-Johansen, MK, Farmer portfolios, strategic diversity management and climate-change adaptation - implications for policy in Vietnam and Kenya, CLIMATE AND DEVELOPMENT
11159807	6714771	TRUE	Kahsay, HT; Guta, DD; Birhanu, BS; Gidey, TG, Farmers' Perceptions of Climate Change Trends and Adaptation Strategies in Semiarid Highlands of Eastern Tigray, Northern Ethiopia, ADVANCES IN METEOROLOGY
11159808	6714772	TRUE	Oloukoi, G.; Fasona, M.; Olorunfemi, F.; Elias, P.; Adedayo, V., Dealing with rainfall variability for food production in the nigerian savannah,
11159809	6714773	TRUE	Fagariba, CJ; Song, SX; Baoro, SKGS, Climate Change Adaptation Strategies and Constraints in Northern Ghana: Evidence of Farmers in Sissala West District, SUSTAINABILITY
11159810	6714774	TRUE	Alemayehu, A; Bewket, W, Smallholder farmers' coping and adaptation strategies to climate change and variability in the central highlands of Ethiopia, LOCAL ENVIRONMENT
11159811	6714775	TRUE	Balama, C; Augustino, S; Eriksen, S; Makonda, FBS, The role of priority non-timber forest products in enhancing local adaptive capacity to climate change stresses in Kilombero district, Tanzania, CLIMATE AND DEVELOPMENT
11159812	6714776	TRUE	Alam, MM; Wahid, ANM; Siwar, C, Resilience, adaptation and expected support for food security among the Malaysian east coast poor households, MANAGEMENT OF ENVIRONMENTAL QUALITY
11159813	6714777	TRUE	Partey, ST; Zougmore, RB; Ouedraogo, M; Thevathasan, NV, Why Promote Improved Fallows as a Climate-Smart Agroforestry Technology in Sub-Saharan Africa?, SUSTAINABILITY
11159814	6714778	TRUE	Rahman, MH; Alam, K, Forest Dependent Indigenous Communities' Perception and Adaptation to Climate Change through Local Knowledge in the Protected Area-A Bangladesh Case Study, CLIMATE
11159815	6714779	TRUE	Uy, TC; Limnirankul, B; Chaovanapoonphol, Y, Factors Impact on Farmers' Adaptation to Drought in Maize Production in Highland Area of Central Vietnam, 1ST INTERNATIONAL CONFERENCE ON ASIAN HIGHLAND NATURAL RESOURCES MANAGEMENT (ASIAHILAND) AND 2ND IDRC-SEARCA UPLAND FELLOWSHIP AND CONFERENCE
11159846	6714781	TRUE	Kankwamba, H; Kadzamira, M; Pauw, K, How diversified is cropping in Malawi? Patterns, determinants and policy implications, FOOD SECURITY
11159847	6714782	TRUE	Zhang, T; Bakar, S, The Implications of Local Perceptions, Knowledge, and Adaptive Strategies for Adaptation Planning in Coastal Communities of Zanzibar, ENVIRONMENTAL JUSTICE
11159848	6714783	TRUE	Adhikari, S; Baral, H; Nitschke, C, Adaptation to Climate Change in Panchase Mountain Ecological Regions of Nepal, ENVIRONMENTS
11159849	6714785	TRUE	Kachergis, E; Derner, JD; Cutts, BB; Roche, LM; Eviner, VT; Lubell, MN; Tate, KW, Increasing flexibility in rangeland management during drought, ECOSPHERE
11159850	6714786	TRUE	Warner, BP, Understanding actor-centered adaptation limits in smallholder agriculture in the Central American dry tropics, AGRICULTURE AND HUMAN VALUES
11159851	6714787	TRUE	Banerjee, RR, Farmers' perception of climate change, impact and adaptation strategies: a case study of four villages in the semi-arid regions of India, NATURAL HAZARDS
11159852	6714789	TRUE	Panda, A; Sharma, U; Patt, A; Ninan, KN, Adaptive capacity contributing to improved agricultural productivity at the household level: Empirical findings highlighting the importance of crop insurance, GLOBAL ENVIRONMENTAL CHANGE-HUMAN AND POLICY DIMENSIONS
11159853	6714790	TRUE	Tongruksawattana, S; Wainaina, P, Climate shock adaptation for Kenyan maize-legume farmers: choice, complementarities and substitutions between strategies, CLIMATE AND DEVELOPMENT
11159854	6714791	TRUE	Opondo, DO, Erosive coping after the 2011 floods in Kenya, INTERNATIONAL JOURNAL OF GLOBAL WARMING
11159855	6714792	TRUE	Alauddin, M; Sarker, MAR, Climate change and farm-level adaptation decisions and strategies in drought-prone and groundwater-depleted areas of Bangladesh: an empirical investigation, ECOLOGICAL ECONOMICS
11159856	6714793	TRUE	Bhatta, GD; Aggarwal, PK; Kristjanson, P; Shrivastava, AK, Climatic and non-climatic factors influencing changing agricultural practices across different rainfall regimes in South Asia, CURRENT SCIENCE
11159857	6714796	TRUE	Meena, R.K.; Vikas; Verma, T.P.; Yadav, R.P.; Mahapatra, S.K.; Surya, J.N.; Singh, D.; Singh, S.K., Local perceptions and adaptation of indigenous communities to climate change: Evidences from high mountain pangi valley of Indian himalayas,
11159858	6714797	TRUE	Chhetri, N; Subedi, M; Ghimire, S, Niche-based responses in addressing the climatic constraints to farm production: analogues to climate-change adaptation in Nepal, CLIMATE AND DEVELOPMENT
11159859	6714800	TRUE	Tessema, Y.A.; Aweke, C.S.; Endris, G.S., Understanding the process of adaptation to climate change by small-holder farmers: the case of east Hararghe Zone, Ethiopia,
11159860	6714801	TRUE	Khanal, U.; Wilson, C., Derivation of a climate change adaptation index and assessing determinants and barriers to adaptation among farming households in Nepal,
11159861	6714802	TRUE	Imran, M.A.; Ali, A.; Ashfaq, M.; Hassan, S.; Culas, R.; Ma, C., Impact of climate smart agriculture (CSA) through sustainable irrigation management on Resource use efficiency: A sustainable production alternative for cotton,
11159862	6714804	TRUE	Alston, M; Akhter, B, Gender and food security in Bangladesh: the impact of climate change, GENDER PLACE AND CULTURE
11159863	6714805	TRUE	Poudel, S; Funakawa, S; Shinjo, H, Household Perceptions about the Impacts of Climate Change on Food Security in the Mountainous Region of Nepal, SUSTAINABILITY
11159864	6714806	TRUE	Comoe, H; Siegrist, M, Relevant drivers of farmers' decision behavior regarding their adaptation to climate change: a case study of two regions in Cote d'Ivoire, MITIGATION AND ADAPTATION STRATEGIES FOR GLOBAL CHANGE
11159865	6714807	TRUE	Nhamo, N; Rodenburg, J; Zenna, N; Makombe, G; Luzi-Kihupi, A, Narrowing the rice yield gap in East and Southern Africa: Using and adapting existing technologies, AGRICULTURAL SYSTEMS
11159886	6714808	TRUE	Sanial, E, Trees appropriation, a new challenge for ivorian cocoa cropping? Technical, environmental and land tenure obstacles, CAHIERS AGRICULTURES
11159887	6714809	TRUE	Adesoji, S.A.; Ayinde, J.O., Ethno-Practices and Adaptation Strategies for the Mitigation of Climate Change by Arable Crop Farmers in Osun State: Implications for Extension Policy Formulation in Nigeria, J. Agric. Food inf.
11159888	6714810	TRUE	Roche, LM, Adaptive Rangeland Decision-Making and Coping with Drought, SUSTAINABILITY
11159889	6714811	TRUE	Hossain, KM; Zaman, F, Unravelling coastal people's adaptation to salinity: evidence from Bangladesh, INTERNATIONAL JOURNAL OF ENVIRONMENT AND SUSTAINABLE DEVELOPMENT
11159890	6714813	TRUE	Aryal, S; Maraseni, TN; Cockfield, G, Sustainability of transhumance grazing systems under socio-economic threats in Langtang, Nepal, JOURNAL OF MOUNTAIN SCIENCE
11159891	6714816	TRUE	Blythe, JL; Murray, G; Flaherty, M, Strengthening threatened communities through adaptation: insights from coastal Mozambique, ECOLOGY AND SOCIETY
11159892	6714817	TRUE	Onoja, A.O.; Abraha, A.Z.; Girma, A.; Achike, A.I., Climate-Smart Agricultural Practices (CSA) Adoption by Crop Farmers in Semi-arid Regions of West and East Africa: Evidence from Nigeria and Ethiopia,
11159893	6714819	TRUE	Merloni, E.; Camanzi, L.; Mulazzani, L.; Malorgio, G., Adaptive capacity to climate change in the wine industry: A Bayesian Network approach,
11159894	6714820	TRUE	Harmanny, KS; Malek, Z, Adaptations in irrigated agriculture in the Mediterranean region: an overview and spatial analysis of implemented strategies, REGIONAL ENVIRONMENTAL CHANGE
11159895	6714822	TRUE	Young, T; Fuller, EC; Provost, MM; Coleman, KE; St Martin, K; McCay, BJ; Pinsky, ML, Adaptation strategies of coastal fishing communities as species shift poleward, ICES JOURNAL OF MARINE SCIENCE
11159916	6714823	TRUE	Mulinde, C; Majaliwa, JGM; Twinomuhangi, R; Mfitumukiza, D; Komutunga, E; Ampaire, E; Asiimwe, J; Van Asten, P; Jassogne, L, Perceived climate risks and adaptation drivers in diverse coffee landscapes of Uganda, NJAS-WAGENINGEN JOURNAL OF LIFE SCIENCES
11159917	6714824	TRUE	Jorgensen, SL; Termansen, M, Linking climate change perceptions to adaptation and mitigation action, CLIMATIC CHANGE
11159918	6714825	TRUE	Arslan, A; Cavatassi, R; Alfani, F; Mccarthy, N; Lipper, L; Kokwe, M, Diversification Under Climate Variability as Part of a CSA Strategy in Rural Zambia, JOURNAL OF DEVELOPMENT STUDIES
11159919	6714826	TRUE	Azadi, Y.; Yazdanpanah, M.; Mahmoudi, H., Understanding smallholder farmers' adaptation behaviors through climate change beliefs, risk perception, trust, and psychological distance: Evidence from wheat growers in Iran,
11159920	6714828	TRUE	Pradhan, NS; Sijapati, S; Bajracharya, SR, Farmers' responses to climate change impact on water availability: insights from the Indrawati Basin in Nepal, INTERNATIONAL JOURNAL OF WATER RESOURCES DEVELOPMENT
11159921	6714829	TRUE	Meza, LER, Adaptive capacity of small-scale coffee farmers to climate change impacts in the Soconusco region of Chiapas, Mexico, CLIMATE AND DEVELOPMENT
11159922	6714830	TRUE	Havet, A; Coquil, X; Fiorelli, JL; Gibon, A; Martel, G; Roche, B; Ryschawy, J; Schaller, N; Dedieu, B, Review of livestock farmer adaptations to increase forages in crop rotations in western France, AGRICULTURE ECOSYSTEMS & ENVIRONMENT
11159925	6714836	TRUE	Hurlbert, M.; Pittman, J., Exploring adaptive management in environmental farm programs in Saskatchewan, Canada, J. Nat. Resour. Policy Res.
11159946	6714837	TRUE	Hussain, A; Rasul, G; Mahapatra, B; Tuladhar, S, Household food security in the face of climate change in the Hindu-Kush Himalayan region, FOOD SECURITY
11159947	6714838	TRUE	Mardero, S; Schmook, B; Radel, C; Christman, Z; Lawrence, D; Millones, M; Nickl, E; Rogan, J; Schneider, L, Smallholders' adaptations to droughts and climatic variability in southeastern Mexico, ENVIRONMENTAL HAZARDS-HUMAN AND POLICY DIMENSIONS
11159948	6714839	TRUE	Birkenholtz, T, Knowing Climate Change: Local Social Institutions and Adaptation in Indian Groundwater Irrigation, PROFESSIONAL GEOGRAPHER
11159949	6714841	TRUE	Hemani, C., Approaches to climate change adaptation of vulnerable coastal communities of India, Handbook of Climate Change Adaptation
11159950	6714842	TRUE	Dorji, N.; Thinley, J.; Wangdi, K.; Rizal, K.; Tshering, K.; Cheda; Kibria, G.; Rabgay, K.; Dorji, Y., Climatic trends, risk perceptions and coping strategies of smallholder cattle farmers in some villages of Bhutan, Livest. Res. Rural Dev.
11159951	6714843	TRUE	Berhanu, W; Beyene, F, Climate Variability and Household Adaptation Strategies in Southern Ethiopia, SUSTAINABILITY
11159952	6714844	TRUE	Megersa, B; Markemann, A; Angassa, A; Ogutu, JO; Piepho, HP; Zarate, AV, Livestock Diversification: an Adaptive Strategy to Climate and Rangeland Ecosystem Changes in Southern Ethiopia, HUMAN ECOLOGY
11159953	6714848	TRUE	Raymond, CM; Spoehr, J, The acceptability of climate change in agricultural communities: Comparing responses across variability and change, JOURNAL OF ENVIRONMENTAL MANAGEMENT
11159954	6714850	TRUE	Rankoana, SA, Perceptions of Climate Change and the Potential for Adaptation in a Rural Community in Limpopo Province, South Africa, SUSTAINABILITY
11159976	6714854	TRUE	Di Falco, S; Veronesi, M, Managing Environmental Risk in Presence of Climate Change: The Role of Adaptation in the Nile Basin of Ethiopia, ENVIRONMENTAL & RESOURCE ECONOMICS
11159977	6714855	TRUE	Borsdorf, A.; Mergili, M.; Ortega, L.A., The Biosphere Reserve Andean Belt, Colombia. Any region model of adaptation strategies to climate change and sustainable regional development?, Rev. Geogr. Norte Grande
11159978	6714857	TRUE	Reichel, C; Fromming, UU, Participatory Mapping of Local Disaster Risk Reduction Knowledge: An Example from Switzerland, INTERNATIONAL JOURNAL OF DISASTER RISK SCIENCE
11159979	6714858	TRUE	Shrestha, RP; Nepal, N, An assessment by subsistence farmers of the risks to food security attributable to climate change in Makwanpur, Nepal, FOOD SECURITY
11159980	6714859	TRUE	Patnaik, U; Narayanan, K, Are traditional coping mechanisms effective in managing the risk against extreme events? Evidences from flood-prone region in rural India, WATER POLICY
11159981	6714860	TRUE	Haque, MA; Budi, A; Malik, AA; Yamamoto, SS; Louis, VR; Sauerborn, R, Health coping strategies of the people vulnerable to climate change in a resource-poor rural setting in Bangladesh, BMC PUBLIC HEALTH
11159982	6714861	TRUE	Oppermann, E; Strengers, Y; Maller, C; Rickards, L; Brearley, M, Beyond Threshold Approaches to Extreme Heat: Repositioning Adaptation as Everyday Practice, WEATHER CLIMATE AND SOCIETY
11159983	6714862	TRUE	Dumenu, WK; Obeng, EA, Climate change and rural communities in Ghana: Social vulnerability, impacts, adaptations and policy implications, ENVIRONMENTAL SCIENCE & POLICY
11159984	6714864	TRUE	Malakar, K; Mishra, T; Patwardhan, A, A framework to investigate drivers of adaptation decisions in marine fishing: Evidence from urban, semi-urban and rural communities, SCIENCE OF THE TOTAL ENVIRONMENT
11159985	6714866	TRUE	Goulden, MC; Adger, WN; Allison, EH; Conway, D, Limits to Resilience from Livelihood Diversification and Social Capital in Lake Social-Ecological Systems, ANNALS OF THE ASSOCIATION OF AMERICAN GEOGRAPHERS
11159986	6714868	TRUE	Yaffa, S, Coping measures not enough to avoid loss and damage from drought in the North Bank Region of The Gambia, INTERNATIONAL JOURNAL OF GLOBAL WARMING
11159987	6714869	TRUE	Lu, QC; Zhang, JY; Peng, ZR; Rahman, ABMS, Inter-city travel behaviour adaptation to extreme weather events, JOURNAL OF TRANSPORT GEOGRAPHY
11159988	6714870	TRUE	Islam, MM; Sallu, S; Hubacek, K; Paavola, J, Migrating to tackle climate variability and change? Insights from coastal fishing communities in Bangladesh, CLIMATIC CHANGE
11159989	6714872	TRUE	Sultana, P.; Thompson, P.M.; Paudel, N.S.; Pariyar, M.; Rahman, M., Transforming local natural resource conflicts to cooperation in a changing climate: Bangladesh and Nepal lessons, Clim. Policy
11159990	6714874	TRUE	Dapilah, F.; Nielsen, J.ÃƒËœ.; Friis, C., The role of social networks in building adaptive capacity and resilience to climate change: a case study from northern Ghana,
11159991	6714875	TRUE	Gao, JF; Mills, BF, Weather Shocks, Coping Strategies, and Consumption Dynamics in Rural Ethiopia, WORLD DEVELOPMENT
11159992	6714876	TRUE	Mitra, A., Male migrants and women farmers in Gorakhpur: Climate adaptation and changing gender relations, Econ. Polit. Wkly.
11159993	6714880	TRUE	Macchi, M; Gurung, AM; Hoermann, B, Community perceptions and responses to climate variability and change in the Himalayas, CLIMATE AND DEVELOPMENT
11159994	6714881	TRUE	Godbolt, AL; Flyen, C; Hauge, AL; Flyen, AC; Moen, LL, Future resilience of cultural heritage buildings - how do residents make sense of public authorities' sustainability measures?, INTERNATIONAL JOURNAL OF DISASTER RESILIENCE IN THE BUILT ENVIRONMENT
11159995	6714882	TRUE	Jha, CK; Gupta, V; Chattopadhyay, U; Sreeraman, BA, Migration as adaptation strategy to cope with climate change A study of farmers' migration in rural India, INTERNATIONAL JOURNAL OF CLIMATE CHANGE STRATEGIES AND MANAGEMENT
11160016	6714883	TRUE	Gioli, G; Khan, T; Bisht, S; Scheffran, J, Migration as an Adaptation Strategy and its Gendered Implications A Case Study From the Upper Indus Basin, MOUNTAIN RESEARCH AND DEVELOPMENT
11160018	6714886	TRUE	Son, H.N.; Chi, D.T.L.; Kingsbury, A., Indigenous knowledge and climate change adaptation of ethnic minorities in the mountainous regions of Vietnam: A case study of the Yao people in Bac Kan Province,
11160019	6714887	TRUE	Wu, CF; Hsieh, YF; Ou, SJ, Thermal Adaptation Methods of Urban Plaza Users in Asia's Hot-Humid Regions: A Taiwan Case Study, INTERNATIONAL JOURNAL OF ENVIRONMENTAL RESEARCH AND PUBLIC HEALTH
11160020	6714888	TRUE	Kabir, M.E.; Davey, P.; Serrao-Neumann, S.; Hossain, M., Seasonal drought thresholds and internal migration for adaptation: Lessons from northern Bangladesh, Pathw. to a Sustain. Econ.: Bridg. the Gap between Paris Clim. Chang. Commit. and Net Zero Emiss.
11160021	6714890	TRUE	Sahay, S, Urban adaptation to climate sensitive health effect: Evaluation of coping strategies for dengue in Delhi, India, SUSTAINABLE CITIES AND SOCIETY
11160022	6714896	TRUE	Kubik, Z; Maurel, M, Weather Shocks, Agricultural Production and Migration: Evidence from Tanzania, JOURNAL OF DEVELOPMENT STUDIES
11160023	6714899	TRUE	Huntington, HP; Begossi, A; Gearheard, SF; Kersey, B; Loring, PA; Mustonen, T; Paudel, PK; Silvano, RAM; Vave, R, How small communities respond to environmental change: patterns from tropical to polar ecosystems, ECOLOGY AND SOCIETY
11160024	6714903	TRUE	Kunz-Plapp, T; Hackenbruch, J; Schipper, JW, Factors of subjective heat stress of urban citizens in contexts of everyday life, NATURAL HAZARDS AND EARTH SYSTEM SCIENCES
11160025	6714904	TRUE	Gioli, G; Khan, T; Scheffran, J, Climatic and environmental change in the Karakoram: making sense of community perceptions and adaptation strategies, REGIONAL ENVIRONMENTAL CHANGE
11160047	6714906	TRUE	Hunter, LM; Murray, S; Riosmena, F, Rainfall Patterns and US Migration from Rural Mexico, INTERNATIONAL MIGRATION REVIEW
11160048	6714907	TRUE	Mashizha, TM, Adapting to climate change: Reflections of peasant farmers in Mashonaland West Province of Zimbabwe, JAMBA-JOURNAL OF DISASTER RISK STUDIES
11160049	6714908	TRUE	Haque, MA; Louis, VR; Phalkey, R; Sauerborn, R, Use of traditional medicines to cope with climate-sensitive diseases in a resource poor setting in Bangladesh, BMC PUBLIC HEALTH
11160050	6714909	TRUE	Tesfaye, W; Seifu, L, Climate change perception and choice of adaptation strategies Empirical evidence from smallholder farmers in east Ethiopia, INTERNATIONAL JOURNAL OF CLIMATE CHANGE STRATEGIES AND MANAGEMENT
11160051	6714910	TRUE	Schaer, C, Condemned to live with one's feet in water? A case study of community based strategies and urban maladaptation in flood prone Pikine/Dakar, Senegal, INTERNATIONAL JOURNAL OF CLIMATE CHANGE STRATEGIES AND MANAGEMENT
11160052	6714911	TRUE	Roco, L; Poblete, D; Meza, F; Kerrigan, G, Farmers' Options to Address Water Scarcity in a Changing Climate: Case Studies from two Basins in Mediterranean Chile, ENVIRONMENTAL MANAGEMENT
11160053	6714912	TRUE	Lei, YR; Finlayson, CM; Thwaites, R; Shi, GQ; Cui, LJ, Using Government Resettlement Projects as a Sustainable Adaptation Strategy for Climate Change, SUSTAINABILITY
11160054	6714913	TRUE	Ofreneo, RP; Hega, MD, Women's solidarity economy initiatives to strengthen food security in response to disasters Insights from two Philippine case studies, DISASTER PREVENTION AND MANAGEMENT
11160055	6714914	TRUE	Murali, J; Afifi, T, Rainfall variability, food security and human mobility in the Janjgir-Champa district of Chhattisgarh state, India, CLIMATE AND DEVELOPMENT
11160066	6714915	TRUE	Dow, K; Haywood, BK; Kettle, NP; Lackstrom, K, The role of ad hoc networks in supporting climate change adaptation: a case study from the Southeastern United States, REGIONAL ENVIRONMENTAL CHANGE
11160067	6714916	TRUE	Douxchamps, S; Van Wijk, MT; Silvestri, S; Moussa, AS; Quiros, C; Ndour, NYB; Buah, S; Some, L; Herrero, M; Kristjanson, P; Ouedraogo, M; Thornton, PK; Van Asten, P; Zougmore, R; Rufino, MC, Linking agricultural adaptation strategies, food security and vulnerability: evidence from West Africa, REGIONAL ENVIRONMENTAL CHANGE
11160068	6714918	TRUE	Loughnan, ME; Carroll, M; Tapper, N, Learning from our older people: Pilot study findings on responding to heat, AUSTRALASIAN JOURNAL ON AGEING
11160069	6714919	TRUE	Dey, A; Singh, G; Gupta, AK, Women and Climate Stress: Role Reversal from Beneficiaries to Expert Participants, WORLD DEVELOPMENT
11160070	6714920	TRUE	Nunes, AR, The contribution of assets to adaptation to extreme temperatures among older adults, PLOS ONE
11160072	6714923	TRUE	Ha'apio, MO; Wairiu, M; Gonzalez, R; Morrison, K, Transformation of rural communities: lessons from a local self-initiative for building resilience in the Solomon Islands, LOCAL ENVIRONMENT
11160073	6714924	TRUE	Beyerl, K; Mieg, HA; Weber, E, Comparing perceived effects of climate-related environmental change and adaptation strategies for the Pacific small island states of Tuvalu, Samoa, and Tonga, ISLAND STUDIES JOURNAL
11160074	6714925	TRUE	Roser-Renouf, C; Maibach, EW; Li, J, Adapting to the Changing Climate: An Assessment of Local Health Department Preparations for Climate Change-Related Health Threats, 2008-2012, PLOS ONE
11160075	6714926	TRUE	Sulieman, HM; Ahmed, AGM, Mapping the pastoral migratory patterns under land appropriation in East Sudan: the case of the Lahaween Ethnic Group, GEOGRAPHICAL JOURNAL
11160076	6714927	TRUE	Fenton, A; Paavola, J; Tallontire, A, Autonomous adaptation to riverine flooding in Satkhira District, Bangladesh: implications for adaptation planning, REGIONAL ENVIRONMENTAL CHANGE
11160077	6714929	TRUE	Kajan, E, Arctic Tourism and Sustainable Adaptation: Community Perspectives to Vulnerability and Climate Change, SCANDINAVIAN JOURNAL OF HOSPITALITY AND TOURISM
11160078	6714930	TRUE	Kabir, MJ; Cramb, R; Alauddin, M; Roth, C; Crimp, S, Farmers' perceptions of and responses to environmental change in southwest coastal Bangladesh, ASIA PACIFIC VIEWPOINT
11160079	6714931	TRUE	Ngigi, MW; Mueller, U; Birner, R, Gender Differences in Climate Change Adaptation Strategies and Participation in Group-based Approaches: An Intra-household Analysis From Rural Kenya, ECOLOGICAL ECONOMICS
11160080	6714932	TRUE	Sapkota, P; Keenan, RJ; Paschen, JA; Ojha, HR, Social production of vulnerability to climate change in the rural middle hills of Nepal, JOURNAL OF RURAL STUDIES
11160081	6714933	TRUE	Singh, RK; Zander, KK; Kumar, S; Singh, A; Sheoran, P; Kumar, A; Hussain, SM; Riba, T; Rallen, O; Lego, YJ; Padung, E; Garnett, ST, Perceptions of climate variability and livelihood adaptations relating to gender and wealth among the Adi community of the Eastern Indian Himalayas, APPLIED GEOGRAPHY
11160082	6714934	TRUE	Sada, R; Shrestha, A; Shukla, AK; Melsen, LA, People's experience and facts of changing climate: impacts and responses, INTERNATIONAL JOURNAL OF CLIMATE CHANGE STRATEGIES AND MANAGEMENT
11160083	6714935	TRUE	Baez, JE; Kronick, D; Mason, AD, Rural Households in a Changing Climate, WORLD BANK RESEARCH OBSERVER
11160084	6714938	TRUE	Fagariba, CJ; Song, SX; Soule, SKG, Factors Influencing Farmers' Climate Change Adaptation in Northern Ghana: Evidence From Subsistence Farmers in Sissala West, Ghana, JOURNAL OF ENVIRONMENTAL SCIENCE AND MANAGEMENT
11160085	6714939	TRUE	Schramski, S; Keys, E, Smallholder Response to Hurricane Dean: Creating New Human Ecologies through Charcoal Production, NATURAL HAZARDS REVIEW
11160126	6714942	TRUE	Buechler, S, Gendered vulnerabilities and grassroots adaptation initiatives in home gardens and small orchards in Northwest Mexico, AMBIO
11160127	6714943	TRUE	Van Aelst, K; Holvoet, N, Climate change adaptation in the Morogoro Region of Tanzania: women's decision-making participation in small-scale farm households, CLIMATE AND DEVELOPMENT
11160128	6714944	TRUE	Archer, D, Building urban climate resilience through community-driven approaches to development Experiences from Asia, INTERNATIONAL JOURNAL OF CLIMATE CHANGE STRATEGIES AND MANAGEMENT
11160129	6714945	TRUE	McElwee, P; Nghiem, T; Le, H; Vu, H, Flood vulnerability among rural households in the Red River Delta of Vietnam: implications for future climate change risk and adaptation, NATURAL HAZARDS
11160130	6714947	TRUE	Monwar, MM; Mustafa, MG; Khan, NA; Hossain, MS; Hossain, MM; Majumder, MK; Chowdhury, RM; Islam, MA; Chowdhury, M; Alam, MS, Indigenous Adaptation Practices for the Development of Climate Resilient Ecosystems in the Hail Haor, Bangladesh, GLOBAL SOCIAL WELFARE
11160131	6714949	TRUE	Batool, H.; Ali, W.; Manzoor, R.; Mahmood, N., Women's Perception of Climate Change and Coping Strategies in Pakistan: An Empirical Evidence, Earth Sys. Environ.
11160132	6714950	TRUE	Mersha, AA; Van Laerhoven, F, A gender approach to understanding the differentiated impact of barriers to adaptation: responses to climate change in rural Ethiopia, REGIONAL ENVIRONMENTAL CHANGE
11160133	6714951	TRUE	Ravera, F; Reyes-Garcia, V; Pascual, U; Drucker, AG; Tarrason, D; Bellon, MR, Gendered agrobiodiversity management and adaptation to climate change: differentiated strategies in two marginal rural areas of India, AGRICULTURE AND HUMAN VALUES
11160134	6714952	TRUE	Birtchnell, T; Gill, N; Sultana, R, Sleeper cells for urban green infrastructure: Harnessing latent competence in greening Dhaka's slums, URBAN FORESTRY & URBAN GREENING
11160156	6714954	TRUE	Nyamweru, H; Dobson, S; Dodman, D, Local and participatory approaches to building resilience in informal settlements in Uganda, ENVIRONMENT AND URBANIZATION
11160157	6714955	TRUE	Oettle, N.; Koelle, B., Poverties and Wealth: Perceptions, Empowerment, and Agency in Sustainable Land Management, Land Restor.: Reclaiming Landsc. for a Sustain. Futur.
11160158	6714956	TRUE	Yamogo, T.B.; Fonta, W.M.; WÃƒÂ¼nscher, T., Can social capital influence smallholder farmers' climate-change adaptation decisions? Evidence from three semi-arid communities in Burkina Faso, West Africa,
11160159	6714957	TRUE	Zheng, Y; Byg, A, Coping with climate change: households' response strategies to drought and hailstorm in Lijiang, China, ENVIRONMENTAL HAZARDS-HUMAN AND POLICY DIMENSIONS
11160162	6714963	TRUE	Musah-Surugu, IJ; Ahenkan, A; Bawole, JN; Darkwah, SA, Migrants' remittances A complementary source of financing adaptation to climate change at the local level in Ghana, INTERNATIONAL JOURNAL OF CLIMATE CHANGE STRATEGIES AND MANAGEMENT
11160163	6714965	TRUE	Bott, LM; Braun, B, How do households respond to coastal hazards? A framework for accommodating strategies using the example of Semarang Bay, Indonesia, INTERNATIONAL JOURNAL OF DISASTER RISK REDUCTION
11160164	6714966	TRUE	Maldonado, J.K.; Shearer, C.; Bronen, R.; Peterson, K.; Lazrus, H., The impact of climate change on tribal communities in the US: Displacement, relocation, and human rights, Climate Change and Indigenous Peoples in the U. States: Impacts, Experiences and Actions
11160165	6714970	TRUE	Lei, YD; Zhang, HL; Chen, F; Zhang, LB, How rural land use management facilitates drought risk adaptation in a changing climate - A case study in arid northern China, SCIENCE OF THE TOTAL ENVIRONMENT
11160196	6714971	TRUE	Balehey, S; Tesfay, G; Balehegn, M, Traditional gender inequalities limit pastoral women's opportunities for adaptation to climate change: Evidence from the Afar pastoralists of Ethiopia, PASTORALISM-RESEARCH POLICY AND PRACTICE
11160197	6714974	TRUE	Zhang, LJ; Tang, Y; Liu, BH, Changes in agricultural system as farmers adapt to economic-social and climatic changes in the min upriver rural areas in western Sichuan, southwestern China, JOURNAL OF MOUNTAIN SCIENCE
11160199	6714977	TRUE	Rahman, HMT; Robinson, BE; Ford, JD; Hickey, GM, How Do Capital Asset Interactions Affect Livelihood Sensitivity to Climatic Stresses? Insights From the Northeastern Floodplains of Bangladesh, ECOLOGICAL ECONOMICS
11160201	6714980	TRUE	Sesmero, J; Ricker-Gilbert, J; Cook, A, HOW DO AFRICAN FARM HOUSEHOLDS RESPOND TO CHANGES IN CURRENT AND PAST WEATHER PATTERNS? A STRUCTURAL PANEL DATA ANALYSIS FROM MALAWI, AMERICAN JOURNAL OF AGRICULTURAL ECONOMICS
11160202	6714981	TRUE	Kalinda, T., Multiple shocks and risk management strategies among rural households in Zambia's Mazabuka District, J. Sustain. Dev.
11160203	6714982	TRUE	Sushant, Impact of Climate Change in Eastern Madhya Pradesh, India, TROPICAL CONSERVATION SCIENCE
11160204	6714984	TRUE	Szlafsztein, CF, Development projects for small rural communities in the Brazilian Amazon region as potential strategies and practices of climate change adaptation, MITIGATION AND ADAPTATION STRATEGIES FOR GLOBAL CHANGE
11160205	6714986	TRUE	Nursey-Bray, M; Palmer, R, Country, climate change adaptation and colonisation: insights from an Indigenous adaptation planning process, Australia, HELIYON
11160246	6714987	TRUE	Younus, M.A.F.; Sharna, S.S., Combination of community-based vulnerability and adaptation to storm surges in coastal regions of Bangladesh, J. Environ. Assess. Policy Manage.
11160247	6714988	TRUE	Petzold, J, Limitations and opportunities of social capital for adaptation to climate change: a case study on the Isles of Scilly, GEOGRAPHICAL JOURNAL
11160248	6714991	TRUE	Barua, P; Rahman, SH; Molla, MH, Sustainable adaptation for resolving climate displacement issues of south eastern islands in Bangladesh, INTERNATIONAL JOURNAL OF CLIMATE CHANGE STRATEGIES AND MANAGEMENT
11160249	6714992	TRUE	Tamura, M; Yasuhara, K; Ajima, K; Trinh, VC; Pham, SV, Vulnerability to climate change and residents' adaptations in coastal areas of Soc Trang Province, Vietnam, INTERNATIONAL JOURNAL OF GLOBAL WARMING
11160250	6714993	TRUE	Fischer, AP, Characterizing behavioral adaptation to climate change in temperate forests, LANDSCAPE AND URBAN PLANNING
11160251	6714995	TRUE	McDowell, G; Stephenson, E; Ford, J, Adaptation to climate change in glaciated mountain regions, CLIMATIC CHANGE
11160252	6714996	TRUE	Herman-Mercer, NM; Laituri, M; Massey, M; Matkin, E; Toohey, RC; Elder, K; Schuster, PF; Mutter, E, Vulnerability of Subsistence Systems Due to Social and Environmental Change: A Case Study in the Yukon-Kuskokwim Delta, Alaska, ARCTIC
11160253	6714997	TRUE	Wang, SJ; Qin, DH, Mountain inhabitants' perspectives on climate change, and its impacts and adaptation based on temporal and spatial characteristics analysis: a case study of Mt. Yulong Snow, Southeastern Tibetan Plateau, ENVIRONMENTAL HAZARDS-HUMAN AND POLICY DIMENSIONS
11160254	6714998	TRUE	Villanueva, AB; Halewood, M; Noriega, IL, Agricultural Biodiversity in Climate Change Adaptation Planning, EUROPEAN JOURNAL OF SUSTAINABLE DEVELOPMENT
11160255	6715000	TRUE	Sumner, D; Christie, ME; Boulakia, S, Conservation agriculture and gendered livelihoods in Northwestern Cambodia: decision-making, space and access, AGRICULTURE AND HUMAN VALUES
11160306	6715001	TRUE	Solorzano, CR, Connecting climate social adaptation and land use change in internationally adjoining protected areas, CONSERVATION & SOCIETY
11160307	6715002	TRUE	Thorn, J; Thornton, TF; Helfgott, A, Autonomous adaptation to global environmental change in peri-urban settlements: Evidence of a growing culture of innovation and revitalisation in Mathare Valley Slums, Nairobi, GLOBAL ENVIRONMENTAL CHANGE-HUMAN AND POLICY DIMENSIONS
11160308	6715003	TRUE	Nguyen, KAT; Jolly, CM; Le, TTH; Bui, CNPT, Climate change awareness, coping mechanisms and adaptation in poor rural coastal communities, Ben Tre Province, Vietnam, INTERNATIONAL JOURNAL OF GLOBAL WARMING
11160309	6715004	TRUE	Opiyo, F; Wasonga, OV; Nyangito, MM; Mureithi, SM; Obando, J; Munang, R, Determinants of perceptions of climate change and adaptation among Turkana pastoralists in northwestern Kenya, CLIMATE AND DEVELOPMENT
11160310	6715005	TRUE	Dharmawan, A.H.; Putri, E.I.K.; Mardiyaningsih, D.I., Smallholder farmers' resilience in rural-ecological crises: Case studies from West Java, Indonesia, Int. J. Sustainability Econ. Soc. Cult. Context
11160311	6715006	TRUE	Brown, DG; Agrawal, A; Sass, DA; Wang, J; Hua, J; Xie, YC, Responses to climate and economic risks and opportunities across national and ecological boundaries: changing household strategies on the Mongolian plateau, ENVIRONMENTAL RESEARCH LETTERS
11160312	6715007	TRUE	Wilson, NJ, The Politics of Adaptation: Subsistence Livelihoods and Vulnerability to Climate Change in the Koyukon Athabascan Village of Ruby, Alaska, HUMAN ECOLOGY
11160314	6715009	TRUE	Forsyth, T; Evans, N, What is Autonomous Adaption? Resource Scarcity and Smallholder Agency in Thailand, WORLD DEVELOPMENT
11160315	6715010	TRUE	Escarcha, JF; Lassa, JA; Palacpac, EP; Zander, KK, Understanding climate change impacts on water buffalo production through farmers' perceptions, CLIMATE RISK MANAGEMENT
11160346	6715011	TRUE	Sovacool, BK; Linner, BO; Klein, RJT, Climate change adaptation and the Least Developed Countries Fund (LDCF): Qualitative insights from policy implementation in the Asia-Pacific, CLIMATIC CHANGE
11160347	6715012	TRUE	Huynh, PTA; Resurreccion, BP, Women's differentiated vulnerability and adaptations to climate-related agricultural water scarcity in rural Central Vietnam, CLIMATE AND DEVELOPMENT
11160348	6715013	TRUE	Ford, JD; McDowell, G; Shirley, J; Pitre, M; Siewierski, R; Gough, W; Duerden, F; Pearce, T; Adams, P; Statham, S, The Dynamic Multiscale Nature of Climate Change Vulnerability: An Inuit Harvesting Example, ANNALS OF THE ASSOCIATION OF AMERICAN GEOGRAPHERS
11160350	6715014	TRUE	Bhatta, GD; Aggarwal, PK; Shrivastava, AK; Sproule, L, Is rainfall gradient a factor of livelihood diversification? Empirical evidence from around climatic hotspots in Indo-Gangetic Plains, ENVIRONMENT DEVELOPMENT AND SUSTAINABILITY
11160351	6715016	TRUE	Alam, GMM; Alam, K; Mushtaq, S, Climate change perceptions and local adaptation strategies of hazard-prone rural households in Bangladesh, CLIMATE RISK MANAGEMENT
11160353	6715017	TRUE	Mulligan, J; Harper, J; Kipkemboi, P; Ngobi, B; Collins, A, Community-responsive adaptation to flooding in Kibera, Kenya, PROCEEDINGS OF THE INSTITUTION OF CIVIL ENGINEERS-ENGINEERING SUSTAINABILITY
11160355	6715018	TRUE	Sahu, NC; Mishra, D, Analysis of Perception and Adaptability Strategies of the Farmers to Climate Change in Odisha, India, 4TH INTERNATIONAL CONFERENCE ON ENVIRONMENTAL SCIENCE AND DEVELOPMENT- ICESD 2013
11160357	6715019	TRUE	Hossain, MZ; Rahman, MAU, Pro-poor adaptation for the urban extreme poor in the context of climate change: A study on Dhaka City, Bangladesh, INTERNATIONAL JOURNAL OF CLIMATE CHANGE STRATEGIES AND MANAGEMENT
11160359	6715020	TRUE	Roy, M; Shemdoe, R; Hulme, D; Mwageni, N; Gough, A, Climate change and declining levels of green structures: Life in informal settlements of Dar es Salaam, Tanzania, LANDSCAPE AND URBAN PLANNING
11160361	6715023	TRUE	Lookabaugh, L, TALKING ABOUT THE WEATHER IN CHIAPAS, MEXICO: RURAL WOMEN'S APPROACHES TO CLIMATE CHANGE ADAPTATION, LATIN AMERICANIST
11160396	6715024	TRUE	Sovacool, BK, Bamboo Beating Bandits: Conflict, Inequality, and Vulnerability in the Political Ecology of Climate Change Adaptation in Bangladesh, WORLD DEVELOPMENT
11160397	6715026	TRUE	Morrison, C; Pickering, CM, Perceptions of climate change impacts, adaptation and limits to adaption in the Australian Alps: the ski-tourism industry and key stakeholders, JOURNAL OF SUSTAINABLE TOURISM
11160398	6715027	TRUE	D'haen, SAL; Nielsen, JO; Lambin, EF, Beyond local climate: rainfall variability as a determinant of household nonfarm activities in contemporary rural Burkina Faso, CLIMATE AND DEVELOPMENT
11160399	6715028	TRUE	Lama, PD; Becker, P, Conflicts in adaptation: case studies from Nepal and the Maldives, DISASTER PREVENTION AND MANAGEMENT
11160401	6715030	TRUE	Fadina, AMR; Barjolle, D, Farmers' Adaptation Strategies to Climate Change and Their Implications in the Zou Department of South Benin, ENVIRONMENTS
11160402	6715032	TRUE	Mavhura, E, Building resilience to food insecurity in rural communities: Evidence from traditional institutions in Zimbabwe, JAMBA-JOURNAL OF DISASTER RISK STUDIES
11160403	6715033	TRUE	Biagetti, S, RESILIENCE IN A MOUNTAIN RANGE: THE CASE OF THE TADRART ACACUS (SOUTHWEST LIBYA), NOMADIC PEOPLES
11160404	6715034	TRUE	Venkatasubramanian, K; Ramnarain, S, Gender and Adaptation to Climate Change: Perspectives from a Pastoral Community in Gujarat, India, DEVELOPMENT AND CHANGE
11160405	6715036	TRUE	Gentle, P; Thwaites, R; Race, D; Alexander, K; Maraseni, T, Household and community responses to impacts of climate change in the rural hills of Nepal, CLIMATIC CHANGE
11160436	6715037	TRUE	Baptiste, A.K., Climate change knowledge, concerns, and behaviors among Caribbean fishers, J. Environ. Stud. Sci.
11160437	6715040	TRUE	Albert, S.; Bronen, R.; Tooler, N.; Leon, J.; Yee, D.; Ash, J.; Boseto, D.; Grinham, A., Heading for the hills: climate-driven community relocations in the Solomon Islands and Alaska provide insight for a 1.5Ã‚Â Ã‚Â°C future, Reg. Environ. Change
11160438	6715042	TRUE	Parsons, M; Brown, C; Nalau, J; Fisher, K, Assessing adaptive capacity and adaptation: insights from Samoan tourism operators, CLIMATE AND DEVELOPMENT
11160439	6715043	TRUE	Thomas, A.; Shooya, O.; Rokitzki, M.; Bertrand, M.; Lissner, T., Climate change adaptation planning in practice: insights from the Caribbean,
11160440	6715044	TRUE	Forster, J; Lake, IR; Watkinson, AR; Gill, JA, Marine dependent livelihoods and resilience to environmental change: A case study of Anguilla, MARINE POLICY
11160441	6715045	TRUE	Mycoo, MA, Beyond 1.5 degrees C: vulnerabilities and adaptation strategies for Caribbean Small Island Developing States, REGIONAL ENVIRONMENTAL CHANGE
11160442	6715047	TRUE	Granderson, AA, The Role of Traditional Knowledge in Building Adaptive Capacity for Climate Change: Perspectives from Vanuatu, WEATHER CLIMATE AND SOCIETY
11160443	6715049	TRUE	Johnston, I, Disaster management and climate change adaptation: a remote island perspective, DISASTER PREVENTION AND MANAGEMENT
11160444	6715052	TRUE	Robinson, SA; Gilfillan, D, Regional organisations and climate change adaptation in small island developing states, REGIONAL ENVIRONMENTAL CHANGE
11160445	6715053	TRUE	Robinson, SA, Adapting to climate change at the national level in Caribbean small island developing states, ISLAND STUDIES JOURNAL
11160446	6715054	TRUE	Moulton, A.A., Agrarian change and the development of the greenhouse farming sector in Jamaica,
11160447	6715056	TRUE	Aswani, S; Vaccaro, I; Abernethy, K; Albert, S; de Pablo, JFL, Can Perceptions of Environmental and Climate Change in Island Communities Assist in Adaptation Planning Locally?, ENVIRONMENTAL MANAGEMENT
11160448	6715057	TRUE	Moghal, Z; O'Connell, E, Multiple stressors impacting a small island tourism destination-community: A nested vulnerability assessment of Oistins, Barbados, TOURISM MANAGEMENT PERSPECTIVES
11160449	6715058	TRUE	Magee, AD; Verdon-Kidd, DC; Kiem, AS; Royle, SA, Tropical cyclone perceptions, impacts and adaptation in the Southwest Pacific: an urban perspective from Fiji, Vanuatu and Tonga, NATURAL HAZARDS AND EARTH SYSTEM SCIENCES
11160450	6715059	TRUE	Stojanov, R; Duzi, B; Kelman, I; Nemec, D; Prochazka, D, Local perceptions of climate change impacts and migration patterns in Male, Maldives, GEOGRAPHICAL JOURNAL
11160451	6715060	TRUE	Neef, A; Benge, L; Boruff, B; Pauli, N; Weber, E; Varea, R, Climate adaptation strategies in Fiji: The role of social norms and cultural values, WORLD DEVELOPMENT
11160454	6715064	TRUE	Jamero, ML; Onuki, M; Esteban, M; Tan, N, Community-based adaptation in low-lying islands in the Philippines: challenges and lessons learned, REGIONAL ENVIRONMENTAL CHANGE
11160455	6715066	TRUE	Williams, JE; Neville, HM; Haak, AL; Colyer, WT; Wenger, SJ; Bradshaw, S, Climate Change Adaptation and Restoration of Western Trout Streams: Opportunities and Strategies, FISHERIES
11160476	6715068	TRUE	Milad, M; Schaich, H; Konold, W, How is adaptation to climate change reflected in current practice of forest management and conservation? A case study from Germany, BIODIVERSITY AND CONSERVATION
11160477	6715072	TRUE	Pittock, J; Finlayson, CM; Howitt, J, Beguiling and risky: 'environmental works and measures' for wetland conservation under a changing climate, HYDROBIOLOGIA
11160478	6715073	TRUE	Hagerman, SM, Governing adaptation across scales: Hotspots and hesitancy in Pacific Northwest forests, LAND USE POLICY
11160479	6715075	TRUE	Postigo, JC, PERCEPTION AND RESILIENCE OF ANDEAN POPULATIONS FACING CLIMATE CHANGE, JOURNAL OF ETHNOBIOLOGY
11160480	6715076	TRUE	Goldhar, C; Bell, T; Wolf, J, Vulnerability to Freshwater Changes in the Inuit Settlement Region of Nunatsiavut, Labrador: A Case Study from Rigolet, ARCTIC
11160481	6715077	TRUE	Stensrud, AB, Climate Change, Water Practices and Relational Worlds in the Andes, ETHNOS
11160483	6715080	TRUE	Bryan, K; Ward, S; Barr, S; Butler, D, Coping with Drought: Perceptions, Intentions and Decision-Stages of South West England Households, WATER RESOURCES MANAGEMENT
11160484	6715081	TRUE	Rai, RK; Neupane, KR; Bajracharya, RM; Dahal, N; Shrestha, S; Devkota, K, Economics of climate adaptive water management practices in Nepal, HELIYON
11160485	6715083	TRUE	Murtinho, F, What facilitates adaptation? An analysis of community-based adaptation to environmental change in the Andes, INTERNATIONAL JOURNAL OF THE COMMONS
11160486	6715084	TRUE	Younus, M.A.F.; Harvey, N., Economic consequences of failed autonomous adaptation to extreme floods: A case study from Bangladesh, Local Econ.
11160487	6715085	TRUE	Thaker, J; Maibach, E; Leiserowitz, A; Zhao, XQ; Howe, P, The Role of Collective Efficacy in Climate Change Adaptation in India, WEATHER CLIMATE AND SOCIETY
11160488	6715087	TRUE	Kalesnikaite, V, Keeping Cities Afloat: Climate Change Adaptation and Collaborative Governance at the Local Level, PUBLIC PERFORMANCE & MANAGEMENT REVIEW
11160489	6715088	TRUE	Haeffner, M; Baggio, JA; Galvin, K, Investigating environmental migration and other rural drought adaptation strategies in Baja California Sur, Mexico, REGIONAL ENVIRONMENTAL CHANGE
11160490	6715089	TRUE	Marfai, MA; Sekaranom, AB; Ward, P, Community responses and adaptation strategies toward flood hazard in Jakarta, Indonesia, NATURAL HAZARDS
11160491	6715090	TRUE	Saito, N., Challenges for adapting Bangkok's flood management systems to climate change, Urban Clim.
11160492	6715091	TRUE	Kazys, J; Leal, W; Stonevicius, E; Valiuskevicius, G; Rimkus, E, Climate change impact on small coastal river basins: from problem identification to adaptation in Klaipeda City, CLIMATE AND DEVELOPMENT
11160493	6715092	TRUE	Harries, T; McEwen, L; Wragg, A, Why it takes an "ontological shock' to prompt increases in small firm resilience: Sensemaking, emotions and flood risk, INTERNATIONAL SMALL BUSINESS JOURNAL-RESEARCHING ENTREPRENEURSHIP
11160495	6715096	TRUE	Ryan, C; Elsner, P, The potential for sand dams to increase the adaptive capacity of East African drylands to climate change, REGIONAL ENVIRONMENTAL CHANGE
11160526	6715097	TRUE	Gallaher, S; Heikkila, T; Patterson, W; Frank, V; Weible, C, Adapting water policy tools to new issues: lessons from Colorado's experience over time, WATER POLICY
11160527	6715099	TRUE	Gebregziabher, G; Rebelo, LM; Langan, S, Interdependence in rainwater management technologies: an analysis of rainwater management adoption in the Blue Nile Basin, ENVIRONMENT DEVELOPMENT AND SUSTAINABILITY
11160528	6715100	TRUE	Rahman, M.; Pokrant, B., Changing local weather and adaptation in two coastal villages in Bangladesh,
11160529	6715101	TRUE	Mills, M; Mutafoglu, K; Adams, VM; Archibald, C; Bell, J; Leon, JX, Perceived and projected flood risk and adaptation in coastal Southeast Queensland, Australia, CLIMATIC CHANGE
11160530	6715102	TRUE	Keshavarz, M; Karami, E, Farmers' decision-making process under drought, JOURNAL OF ARID ENVIRONMENTS
11160531	6715103	TRUE	Yeo, WE; Goula, BTA; Diekkruger, B; Afouda, A, Vulnerability and adaptation to climate change in the Comoe River Basin (West Africa), SPRINGERPLUS
11160532	6715104	TRUE	Baird, J; Plummer, R; Moore, ML; Brandes, O, Introducing Resilience Practice to Watershed Groups: What Are the Learning Effects?, SOCIETY & NATURAL RESOURCES
11160533	6715105	TRUE	Madrigal-Ballestero, R; Naranjo, MA, Adaptive capacity, drought and the performance of community-based drinking water organizations in Costa Rica, JOURNAL OF WATER AND CLIMATE CHANGE
11160534	6715106	TRUE	Bandyopadhyay, S; Skoufias, E, Rainfall variability, occupational choice, and welfare in rural Bangladesh, REVIEW OF ECONOMICS OF THE HOUSEHOLD
11160535	6715107	TRUE	Ashraf, M; Routray, JK, Perception and understanding of drought and coping strategies of farming households in north-west Balochistan, INTERNATIONAL JOURNAL OF DISASTER RISK REDUCTION
11160546	6715108	TRUE	Kamperman, H; Biesbroek, R, Measuring Progress on Climate Change Adaptation Policy by Dutch Water Boards, WATER RESOURCES MANAGEMENT
11160547	6715109	TRUE	Panda, A, Exploring climate change perceptions, rainfall trends and perceived barriers to adaptation in a drought affected region in India, NATURAL HAZARDS
11160548	6715110	TRUE	Ekstrom, JA; Bedsworth, L; Fencl, A, Gauging climate preparedness to inform adaptation needs: local level adaptation in drinking water quality in CA, USA, CLIMATIC CHANGE
11160549	6715111	TRUE	Muita, RR; van Ogtrop, F; Ampt, P; Vervoort, RW, Managing the water cycle in Kenyan small-scale maize farming systems: Part 1. Farmer perceptions of drought and climate variability, WILEY INTERDISCIPLINARY REVIEWS-WATER
11160550	6715112	TRUE	Paille, Mary; Reams, Margaret; Argote, Jennifer; Lam, Nina S-N; Kirby, Ryan, Influences on Adaptive Planning to Reduce Flood Risks among Parishes in South Louisiana.,
11160551	6715113	TRUE	Putra, GAY; Koestoer, RH; Lestari, I, Local resilience towards overcoming floods of local climate change for adaptation: A study of marunda community in north jakarta, 12TH INTERNATIONAL INTERDISCIPLINARY STUDIES SEMINAR: ENVIRONMENTAL CONSERVATION AND EDUCATION FOR SUSTAINABLE DEVELOPMENT
11160553	6715114	TRUE	Lindoso, DP; Eiro, F; Bursztyn, M; Rodrigues, S; Nasuti, S, Harvesting Water for Living with Drought: Insights from the Brazilian Human Coexistence with Semi-Aridity Approach towards Achieving the Sustainable Development Goals, SUSTAINABILITY
11160555	6715115	TRUE	Zhang, LY; Hu, JM; Li, YB; Pradhan, NS, Public-private partnership in enhancing farmers' adaptation to drought: Insights from the Lujiang Flatland in the Nu River (Upper Salween) valley, China, LAND USE POLICY
11160557	6715116	TRUE	Sen, SM; Kansal, A, Achieving water security in rural Indian Himalayas: A participatory account of challenges and potential solutions, JOURNAL OF ENVIRONMENTAL MANAGEMENT
11160559	6715117	TRUE	Yang, H; Villamor, GB; Su, YF; Wang, MC; Xu, JC, Land-use response to drought scenarios and water policy intervention in Lijiang, SW China, LAND USE POLICY
11160586	6715118	TRUE	Motsholapheko, MR; Kgathi, DL; Vanderpost, C, An assessment of adaptation planning for flood variability in the Okavango Delta, Botswana, MITIGATION AND ADAPTATION STRATEGIES FOR GLOBAL CHANGE
11160587	6715119	TRUE	Watto, MA; Mugera, AW; Kingwell, R; Saqab, MM, Re-thinking the unimpeded tube-well growth under the depleting groundwater resources in the Punjab, Pakistan, HYDROGEOLOGY JOURNAL
11160588	6715120	TRUE	Al-Kalbani, MS; Price, MF; O'Higgins, T; Ahmed, M; Abahussain, A, Integrated environmental assessment to explore water resources management in Al Jabal Al Akhdar, Sultanate of Oman, REGIONAL ENVIRONMENTAL CHANGE
11160589	6715121	TRUE	Barrett, T; Feola, G; Khusnitdinova, M; Krylova, V, Adapting Agricultural Water Use to Climate Change in a Post-Soviet Context: Challenges and Opportunities in Southeast Kazakhstan, HUMAN ECOLOGY
11160590	6715122	TRUE	Mabuku, MP; Senzanje, A; Mudhara, M; Jewitt, GPW; Mulwafu, WO, Strategies for coping and adapting to flooding and their determinants: A comparative study of cases from Namibia and Zambia, PHYSICS AND CHEMISTRY OF THE EARTH
11160591	6715124	TRUE	Musyoki, A; Thifhulufhelwi, R; Murungweni, FM, The impact of and responses to flooding in Thulamela Municipality, Limpopo Province, South Africa, JAMBA-JOURNAL OF DISASTER RISK STUDIES
11160592	6715126	TRUE	Osberghaus, D, The effect of flood experience on household mitigation-Evidence from longitudinal and insurance data, GLOBAL ENVIRONMENTAL CHANGE-HUMAN AND POLICY DIMENSIONS
11160593	6715127	TRUE	Rey, D; Holman, IP; Knox, JW, Developing drought resilience in irrigated agriculture in the face of increasing water scarcity, REGIONAL ENVIRONMENTAL CHANGE
11160594	6715128	TRUE	Deng, Y; Wang, M; Yousefpour, R, How do people's perceptions and climatic disaster experiences influence their daily behaviors regarding adaptation to climate change? A case study among young generations, SCIENCE OF THE TOTAL ENVIRONMENT
11160595	6715129	TRUE	Diaz, P; Morley, KM; Yeh, DH, Resilient urban water supply: preparing for the slow-moving consequences of climate change, WATER PRACTICE AND TECHNOLOGY
11160626	6715131	TRUE	Lo, AY; Chan, F, Preparing for flooding in England and Wales: the role of risk perception and the social context in driving individual action, NATURAL HAZARDS
11160628	6715135	TRUE	Jaja, J; Dawson, J; Gaudet, J, Using Social Network Analysis to examine the role that institutional integration plays in community-based adaptive capacity to climate change in Caribbean small island communities, LOCAL ENVIRONMENT
11160629	6715136	TRUE	Ticehurst, JL; Curtis, AL, The intention of irrigators to adopt water use efficient measures: case studies in the north and south of the Murray-Darling Basin, AUSTRALASIAN JOURNAL OF WATER RESOURCES
11160630	6715137	TRUE	Stojanov, R; Duzi, B; Danek, T; Nemec, D; Prochazka, D, Adaptation to the Impacts of Climate Extremes in Central Europe: A Case Study in a Rural Area in the Czech Republic, SUSTAINABILITY
11160631	6715138	TRUE	Devkota, RP; Cockfield, G; Maraseni, TN, Perceived community-based flood adaptation strategies under climate change in Nepal, INTERNATIONAL JOURNAL OF GLOBAL WARMING
11160632	6715139	TRUE	Gebretsadik, ZM, Watershed degradation and the growing risk of erosion in Hawassa-Zuria District, Southern Ethiopia, JOURNAL OF FLOOD RISK MANAGEMENT
11160633	6715141	TRUE	Burchfield, EK; Gilligan, JM, DYNAMICS OF INDIVIDUAL AND COLLECTIVE AGRICULTURAL ADAPTATION TO WATER SCARCITY, 2016 WINTER SIMULATION CONFERENCE (WSC)
11160634	6715153	TRUE	Walsh, C, Integration of expertise or collaborative practice?: Coastal management and climate adaptation at the Wadden Sea, OCEAN & COASTAL MANAGEMENT
11160635	6715156	TRUE	Karlsson, M; Hovelsrud, GK, Local collective action: Adaptation to coastal erosion in the Monkey River Village, Belize, GLOBAL ENVIRONMENTAL CHANGE-HUMAN AND POLICY DIMENSIONS
11160660	6715157	TRUE	Arie, S.; Ayu, W.; Dinesta, A.; Tresta, C.; Abdu, A.; Rachmat, B.; Agus, S.; Joni, H., Assessing factors that affect selection of adaptation strategies for small-scale fishing communities, Disaster Adv.
11160662	6715158	TRUE	McMichael, C.; Katonivualiku, M., Thick temporalities of planned relocation in Fiji,
11160664	6715159	TRUE	Bowering, E., Adapting to climate-induced sea level rise on the Gold Coast: lessons from the Netherlands, Aust. Plann.
11160666	6715160	TRUE	Niven, RJ; Bardsley, DK, Planned retreat as a management response to coastal risk: a case study from the Fleurieu Peninsula, South Australia, REGIONAL ENVIRONMENTAL CHANGE
11160667	6715162	TRUE	Wamsler, C; Niven, L; Beery, TH; Bramryd, T; Ekelund, N; Jonsson, KI; Osmani, A; Palo, T; Stalhammar, S, Operationalizing ecosystem-based adaptation: harnessing ecosystem services to buffer communities against climate change, ECOLOGY AND SOCIETY
11160669	6715163	TRUE	Pecl, G.T.; Ogier, E.; Jennings, S.; van Putten, I.; Crawford, C.; Fogarty, H.; Frusher, S.; Hobday, A.J.; Keane, J.; Lee, E.; MacLeod, C.; Mundy, C.; Stuart-Smith, J.; Tracey, S., Autonomous adaptation to climate-driven change in marine biodiversity in a global marine hotspot,
11160671	6715164	TRUE	Delisle, S; Turner, S, 'The weather is like the game we play': Coping and adaptation strategies for extreme weather events among ethnic minority groups in upland northern Vietnam, ASIA PACIFIC VIEWPOINT
11160673	6715165	TRUE	Fischer, AP, Pathways of adaptation to external stressors in coastal natural-resource-dependent communities: Implications for climate change, WORLD DEVELOPMENT
11160675	6715167	TRUE	Jamero, ML; Onuki, M; Esteban, M; Billones-Sensano, XK; Tan, N; Nellas, A; Takagi, H; Thao, ND; Valenzuela, VP, Small-island communities in the Philippines prefer local measures to relocation in response to sea-level rise, NATURE CLIMATE CHANGE
11160686	6715168	TRUE	Pinto, PJ; Kondolf, GM; Wong, PLR, Adapting to sea level rise: Emerging governance issues in the San Francisco Bay Region, ENVIRONMENTAL SCIENCE & POLICY
11160689	6715175	TRUE	Middelbeek, L; Kolle, K; Verrest, H, Built to last? Local climate change adaptation and governance in the Caribbean - The case of an informal urban settlement in Trinidad and Tobago, URBAN CLIMATE
11160690	6715176	TRUE	Javeline, D; Kijewski-Correa, T, Coastal homeowners in a changing climate, CLIMATIC CHANGE
11160691	6715179	TRUE	Koerth, J; Vafeidis, AT; Hinkel, J, Household-Level Coastal Adaptation and Its Drivers: A Systematic Case Study Review, RISK ANALYSIS
11160692	6715180	TRUE	Furman, C; Roncoli, C; Nelson, DR; Hoogenboom, G, Growing food, growing a movement: climate adaptation and civic agriculture in the southeastern United States, AGRICULTURE AND HUMAN VALUES
11160694	6715184	TRUE	Woodru, SC; Stults, M, Numerous strategies but limited implementation guidance in US local adaptation plans, NATURE CLIMATE CHANGE
11160695	6715185	TRUE	Poutiainen, C; Berrang-Ford, L; Ford, J; Heymann, J, Civil society organizations and adaptation to the health effects of climate change in Canada, PUBLIC HEALTH
11160726	6715187	TRUE	Koski, C; Keating, M, Holding Back the Storm: Target Populations and State Climate Adaptation Planning in America, REVIEW OF POLICY RESEARCH
11160727	6715188	TRUE	Gadamus, L, Linkages between human health and ocean health: a participatory climate change vulnerability assessment for marine mammal harvesters, INTERNATIONAL JOURNAL OF CIRCUMPOLAR HEALTH
11160728	6715190	TRUE	Neff, MW; Larson, BMH, Scientists, managers, and assisted colonization: Four contrasting perspectives entangle science and policy, BIOLOGICAL CONSERVATION
11160729	6715192	TRUE	Tashman, P; Rivera, J, ECOLOGICAL UNCERTAINTY, ADAPTATION, AND MITIGATION IN THE US SKI RESORT INDUSTRY: MANAGING RESOURCE DEPENDENCE AND INSTITUTIONAL PRESSURES, STRATEGIC MANAGEMENT JOURNAL
11160731	6715194	TRUE	Frawley, TH; Crowder, LB; Broad, K, Heterogeneous Perceptions of Social-Ecological Change Among Small-Scale Fishermen in the Central Gulf of California: Implications for Adaptive Response, FRONTIERS IN MARINE SCIENCE
11160732	6715195	TRUE	van Dijl, EA; Grogan, KA; Borisova, T, Determinants of adoption of drought adaptations among vegetable growers in Florida, JOURNAL OF SOIL AND WATER CONSERVATION
11160733	6715198	TRUE	Gianotti, AGS; Warner, B; Milman, A, Flood concerns and impacts on rural landowners: An empirical study of the Deerfield watershed, MA (USA), ENVIRONMENTAL SCIENCE & POLICY
11160734	6715199	TRUE	Bennett, B; Haggerty, M; Welcomer, S; Jemison, J, Reliable Knowledge and Habits of the Mind: Factors Inhibiting and Facilitating Farmers' Adaptations to Energy Constraints, JOURNAL OF ECONOMIC ISSUES
11160736	6715201	TRUE	Picketts, IM, Practitioners, priorities, plans, and policies: assessing climate change adaptation actions in a Canadian community, SUSTAINABILITY SCIENCE
11160756	6715205	TRUE	Thistlethwaite, J, The Emergence of Flood Insurance in Canada: Navigating Institutional Uncertainty, RISK ANALYSIS
11160758	6715209	TRUE	Scheller, RM; Parajuli, R, Forest Management for Climate Change in New England and the Klamath Ecoregions: Motivations, Practices, and Barriers, FORESTS
11160759	6715210	TRUE	McCreary, A; Seekamp, E; Larson, LL; Smith, JW; Davenport, MA, Predictors of visitors' climate-related coping behaviors in a nature-based tourism destination, JOURNAL OF OUTDOOR RECREATION AND TOURISM-RESEARCH PLANNING AND MANAGEMENT
11160760	6715211	TRUE	Hultquist, A; Wood, RS; Romsdahl, RJ, The Relationship Between Climate Change Policy and Socioeconomic Changes in the US Great Plains, URBAN AFFAIRS REVIEW
11160761	6715213	TRUE	Romsdahl, RJ; Wood, RS; Hultquist, A, Planning for Climate Change Adaptation in Natural Resources Management: Challenges to Policy-Making in the US Great Plains, JOURNAL OF ENVIRONMENTAL POLICY & PLANNING
11160762	6715214	TRUE	Hurlbert, M, Learning, participation, and adaptation: exploring agri-environmental programmes, JOURNAL OF ENVIRONMENTAL PLANNING AND MANAGEMENT
11160764	6715216	TRUE	Dubois, B; Krasny, ME, Educating with resilience in mind: Addressing climate change in post-Sandy New York City, JOURNAL OF ENVIRONMENTAL EDUCATION
11160765	6715221	TRUE	VanderMolen, K; Horangic, A, Implications of Regulatory Drought for farmer Use of Climate Information in the Klamath Basin, WEATHER CLIMATE AND SOCIETY
11160806	6715223	TRUE	Nagel, LM; Palik, BJ; Battaglia, MA; D'Amato, AW; Guldin, JM; Swanston, CW; Janowiak, MK; Powers, MP; Joyce, LA; Millar, CI; Peterson, DL; Ganio, LM; Kirschbaum, C; Roske, MR, Adaptive Silviculture for Climate Change: A National Experiment in Manager-Scientist Partnerships to Apply an Adaptation Framework, JOURNAL OF FORESTRY
11160807	6715224	TRUE	Becker, A; Ng, AKY; McEvoy, D; Mullett, J, Implications of climate change for shipping: Ports and supply chains, WILEY INTERDISCIPLINARY REVIEWS-CLIMATE CHANGE
11160808	6715226	TRUE	Wardropper, CB; Rissman, AR, Adaptations to extreme storm events by conservation organizations, CLIMATIC CHANGE
11160809	6715228	TRUE	Milman, A; Warner, BP, The interfaces of public and private adaptation: Lessons from flooding in the Deerfield River Watershed, GLOBAL ENVIRONMENTAL CHANGE-HUMAN AND POLICY DIMENSIONS
11160811	6715234	TRUE	Cloutier, G; Papin, M; Bizier, C, Do-it-yourself (DIY) adaptation: Civic initiatives as drivers to address climate change at the urban scale, CITIES
11160813	6715238	TRUE	White-Newsome, JL; McCormick, S; Sampson, N; Buxton, MA; O'Neill, MS; Gronlund, CJ; Catalano, L; Conlon, KC; Parker, EA, Strategies to Reduce the Harmful Effects of Extreme Heat Events: A Four-City Study, INTERNATIONAL JOURNAL OF ENVIRONMENTAL RESEARCH AND PUBLIC HEALTH
11160815	6715241	TRUE	Rivera, J.; Clement, V., Business adaptation to climate change: American ski resorts and warmer temperatures,
11160819	6715244	TRUE	Mallen, C.; Dingle, G., Climate change and Canadian community grass-based sport fields, Int. J. Environ. Sustainability
11160856	6715245	TRUE	Morton, LW; Hobbs, J; Arbuckle, JG; Loy, A, Upper Midwest Climate Variations: Farmer Responses to Excess Water Risks, JOURNAL OF ENVIRONMENTAL QUALITY
11160857	6715246	TRUE	McNeeley, SM; Beeton, TA; Ojima, DS, Drought Risk and Adaptation in the Interior United States: Understanding the Importance of Local Context for Resource Management in Times of Drought, WEATHER CLIMATE AND SOCIETY
11160859	6715258	TRUE	Muchuru, S.; Nhamo, G., A review of climate change adaptation measures in the African crop sector, Clim. Dev.
11160860	6715259	TRUE	Tambo, JA; Abdoulaye, T, Smallholder farmers' perceptions of and adaptations to climate change in the Nigerian savanna, REGIONAL ENVIRONMENTAL CHANGE
11160861	6715260	TRUE	Lokonon, BOK; Mbaye, AA, Climate change and adoption of sustainable land management practices in the Niger basin of Benin, NATURAL RESOURCES FORUM
11160862	6715261	TRUE	Asayehegn, K; Temple, L; Sanchez, B; Iglesias, A, Perception of climate change and farm level adaptation choices in central Kenya, CAHIERS AGRICULTURES
11160863	6715262	TRUE	Wetende, E; Olago, D; Ogara, W, Perceptions of climate change variability and adaptation strategies on smallholder dairy farming systems: Insights from Siaya Sub-County of Western Kenya, ENVIRONMENTAL DEVELOPMENT
11160864	6715318	TRUE	Li, YY; Wang, YJ; Chen, XH, The roles of community assets in mitigating the impact of drought on grain yields in Northwest China, NATURAL HAZARDS
11160865	6715319	TRUE	Abid, M; Schilling, J; Scheffran, J; Zulfiqar, F, Climate change vulnerability, adaptation and risk perceptions at farm level in Punjab, Pakistan, SCIENCE OF THE TOTAL ENVIRONMENT
11160896	6715320	TRUE	Adam, HN; Kjosavik, DJ; Shanmugaratnam, N, Adaptation trajectories and challenges in the Western Ghats: A case study of Attappady, south India, JOURNAL OF RURAL STUDIES
11160897	6715321	TRUE	Regmi, BR; Star, C; Leal, W, Effectiveness of the Local Adaptation Plan of Action to support climate change adaptation in Nepal, MITIGATION AND ADAPTATION STRATEGIES FOR GLOBAL CHANGE
11160898	6715326	TRUE	Dalimunthe, SA, Who Manages Space? Eco-DRR and the Local Community, SUSTAINABILITY
11160899	6715328	TRUE	Chu, EK, Urban climate adaptation and the reshaping of state-society relations: The politics of community knowledge and mobilisation in Indore, India, URBAN STUDIES
11160900	6715331	TRUE	Barrucand, MG; Vieira, CG; Canziani, PO, Climate change and its impacts: perception and adaptation in rural areas of Manizales, Colombia, CLIMATE AND DEVELOPMENT
11160901	6715332	TRUE	Burney, J; Cesano, D; Russell, J; La Rovere, EL; Corral, T; Coelho, NS; Santos, L, Climate change adaptation strategies for smallholder farmers in the Brazilian Sertao, CLIMATIC CHANGE
11160902	6715333	TRUE	Nagy, GJ; Seijo, L; Verocai, JE; Bidegain, M, Stakeholders' climate perception and adaptation in coastal Uruguay, INTERNATIONAL JOURNAL OF CLIMATE CHANGE STRATEGIES AND MANAGEMENT
11160903	6715334	TRUE	Luque, A; Edwards, GAS; Lalande, C, The local governance of climate change: new tools to respond to old limitations in Esmeraldas, Ecuador, LOCAL ENVIRONMENT
11160904	6715336	TRUE	Radel, C; Schmook, B; Carte, L; Mardero, S, Toward a Political Ecology of Migration: Land, Labor Migration, and Climate Change in Northwestern Nicaragua, WORLD DEVELOPMENT
11160905	6715337	TRUE	Faraco, LFD; Andriguetto, JM; Daw, T; Lana, PD; Teixeira, CF, Vulnerability Among Fishers in Southern Brazil and its Relation to Marine Protected Areas in a Scenario of Declining Fisheries, DESENVOLVIMENTO E MEIO AMBIENTE
11160957	6715340	TRUE	Wamsler, C; Brink, E, Planning for Climatic Extremes and Variability: A Review of Swedish Municipalities' Adaptation Responses, SUSTAINABILITY
11160958	6715341	TRUE	Barkmann, T; Siebert, R; Lange, A, Climate change adaptation and mitigation in agriculture, forestry and water management at the regional scale A case study from the North German Plain, OUTLOOK ON AGRICULTURE
11160959	6715342	TRUE	Geyer, J.; Strixner, L.; Kreft, S.; Jeltsch, F.; Ibisch, P.L., Adapting conservation to climate change: a case study on feasibility and implementation in Brandenburg, Germany, Reg. Environ. Change
11160960	6715344	TRUE	Jones, N; Koukoulas, S; Clark, JRA; Evangelinos, KI; Dimitrakopoulos, PG; Eftihidou, MO; Koliou, A; Mpalaska, M; Papanikolaou, S; Stathi, G; Tsaliki, P, Social capital and citizen perceptions of coastal management for tackling climate change impacts in Greece, REGIONAL ENVIRONMENTAL CHANGE
11160961	6715346	TRUE	PeÃƒÂ±alba, L.M.; Elazegui, D.D., Improving adaptive capacity of small-scale rice farmers: Comparative analysis of Lao PDR and the Philippines, World Appl. Sci. J.
11160962	6715347	TRUE	Hasan, MK; Desiere, S; D'Haese, M; Kumar, L, Impact of climate-smart agriculture adoption on the food security of coastal farmers in Bangladesh, FOOD SECURITY
11160963	6715349	TRUE	Swe, LMM; Shrestha, RP; Ebbers, T; Jourdain, D, Farmers' perception of and adaptation to climate-change impacts in the Dry Zone of Myanmar, CLIMATE AND DEVELOPMENT
11160964	6715350	TRUE	Teklewold, H; Mekonnen, A; Kohlin, G; Di Falco, S, DOES ADOPTION OF MULTIPLE CLIMATE-SMART PRACTICES IMPROVE FARMERS' CLIMATE RESILIENCE? EMPIRICAL EVIDENCE FROM THE NILE BASIN OF ETHIOPIA, CLIMATE CHANGE ECONOMICS
11160965	6715352	TRUE	Fatoric, S; Seekamp, E, Evaluating a decision analytic approach to climate change adaptation of cultural resources along the Atlantic Coast of the United States, LAND USE POLICY
11161006	6715353	TRUE	Campos, M; Herrador, D; Manuel, C; McCall, MK, ADAPTATION STRATEGIES TO CLIMATE CHANGE IN TWO RURAL COMMUNITIES IN MEXICO AND EL SALVADOR, BOLETIN DE LA ASOCIACION DE GEOGRAFOS ESPANOLES
11161007	6715354	TRUE	Ford, JD; McDowell, G; Jones, J, The state of climate change adaptation in the Arctic, ENVIRONMENTAL RESEARCH LETTERS
11161008	6715355	TRUE	Bee, BA, Power, perception, and adaptation: Exploring gender and social-environmental risk perception in northern Guanajuato, Mexico, GEOFORUM
11161009	6715357	TRUE	Chatrchyan, AM; Erlebacher, RC; Chaopricha, NT; Chan, J; Tobin, D; Allred, SB, United States agricultural stakeholder views and decisions on climate change, WILEY INTERDISCIPLINARY REVIEWS-CLIMATE CHANGE
11161010	6715358	TRUE	Labbe, J; Ford, JD; Araos, M; Flynn, M, The government-led climate change adaptation landscape in Nunavut, Canada, ENVIRONMENTAL REVIEWS
11161011	6715361	TRUE	Susser, D, Coastal dwellers-power against climate change: a place-based perspective on individual and collective engagement in North Frisia, JOURNAL OF COASTAL CONSERVATION
11159626	6715362	TRUE	Nguyen, L.A.; Verreth, J.A.J.; Leemans, R.; Bosma, R.; De Silva, S., A decision tree analysis to support potential climate change adaptations of striped catfish (Pangasianodon hypophthalmus Sauvage) farming in the Mekong Delta, Vietnam, Tropicultura
11159630	6715363	TRUE	Ng, AKY; Zhang, HY; Afenyo, M; Becker, A; Cahoon, S; Chen, SL; Esteban, M; Ferrari, C; Lau, YY; Lee, PTW; Monios, J; Tei, A; Yang, ZL; Acciaro, M, Port Decision Maker Perceptions on the Effectiveness of Climate Adaptation Actions, COASTAL MANAGEMENT
11159634	6715364	TRUE	de Almeida, BA; Mostafavi, A, Resilience of Infrastructure Systems to Sea-Level Rise in Coastal Areas: Impacts, Adaptation Measures, and Implementation Challenges, SUSTAINABILITY
11159646	6715372	TRUE	Amaru, S; Chhetri, NB, Climate adaptation: Institutional response to environmental constraints, and the need for increased flexibility, participation, and integration of approaches, APPLIED GEOGRAPHY
11159650	6715376	TRUE	Biagini, B; Bierbaum, R; Stults, M; Dobardzic, S; McNeeley, SM, A typology of adaptation actions: A global look at climate adaptation actions financed through the Global Environment Facility, GLOBAL ENVIRONMENTAL CHANGE-HUMAN AND POLICY DIMENSIONS
11159654	6715377	TRUE	Burnham, M; Ma, Z, Climate change adaptation: factors influencing Chinese smallholder farmers' perceived self-efficacy and adaptation intent, REGIONAL ENVIRONMENTAL CHANGE
11159657	6715379	TRUE	Gong, YZ; Li, H; Parks, M; Pang, J; de Fraiture, C, The role of social capital for farmers' climate change adaptation in Lancang River basin in China, CLIMATIC CHANGE
11159676	6715383	TRUE	Cloutier, G; Joerin, F; Dubois, C; Labarthe, M; Legay, C; Viens, D, Planning adaptation based on local actors' knowledge and participation: a climate governance experiment, CLIMATE POLICY
11159677	6715385	TRUE	Dos Santos, F.M.; Do Carmo, R.L., The Human dimensions of environmental changes: Environmental perception and adaptation strategies in Ilha Comprida - SÃƒÂ£o Paulo, J. Integr. Costal Zone Manage.
11159678	6715387	TRUE	Eleftheriadis, I; Anagnostopoulou, E, Measuring the level of corporate commitment regarding climate change strategies, INTERNATIONAL JOURNAL OF CLIMATE CHANGE STRATEGIES AND MANAGEMENT
11159679	6715389	TRUE	Pandey, R; Kumar, P; Archie, KM; Gupt, AK; Joshi, PK; Valente, D; Petrosillo, I, Climate change adaptation in the western-Himalayas: Household level perspectives on impacts and barriers, ECOLOGICAL INDICATORS
11159680	6715391	TRUE	Pulhin, JM; Peras, RJJ; Pulhin, FB; Gevana, DT, Farmers' Adaptation to Climate Variability: Assessment of Effectiveness and Barriers Based on Local Experience in Southern Philippines, JOURNAL OF ENVIRONMENTAL SCIENCE AND MANAGEMENT
11159681	6715393	TRUE	Rahman, HMT; Hickey, GM, What Does Autonomous Adaptation to Climate Change Have to Teach Public Policy and Planning About Avoiding the Risks of Maladaptation in Bangladesh?, FRONTIERS IN ENVIRONMENTAL SCIENCE
11159682	6715394	TRUE	Raymond, CM; Robinson, GM, Factors affecting rural landholders' adaptation to climate change: Insights from formal institutions and communities of practice, GLOBAL ENVIRONMENTAL CHANGE-HUMAN AND POLICY DIMENSIONS
11159683	6715396	TRUE	Stechemesser, K; Endrikat, J; Grasshoff, N; Guenther, E, Insurance Companies' Responses to Climate Change: Adaptation, Dynamic Capabilities and Competitive Advantage, GENEVA PAPERS ON RISK AND INSURANCE-ISSUES AND PRACTICE
11159684	6715398	TRUE	Lama, PD, Gendered consequences of mobility for adaptation in small island developing states: case studies from Maafushi and Kudafari in the Maldives, ISLAND STUDIES JOURNAL
11159685	6715399	TRUE	McNaught, R; Warrick, O; Cooper, A, Communicating climate change for adaptation in rural communities: a Pacific study, REGIONAL ENVIRONMENTAL CHANGE
11159706	6715400	TRUE	Robinson, SA, Climate change adaptation trends in small island developing states, MITIGATION AND ADAPTATION STRATEGIES FOR GLOBAL CHANGE
11159708	6715404	TRUE	Zeweld, W; Van Huylenbroeck, G; Tesfay, G; Azadi, H; Speelman, S, Impacts of Socio-Psychological Factors on Actual Adoption of Sustainable Land Management Practices in Dryland and Water Stressed Areas, SUSTAINABILITY
11159709	6715405	TRUE	Singh, C; Solomon, D; Bendapudi, R; Kuchimanchi, B; Iyer, S; Bazaz, A, What shapes vulnerability and risk management in semi-arid India? Moving towards an agenda of sustainable adaptation, ENVIRONMENTAL DEVELOPMENT
11159711	6715407	TRUE	Touch, V; Martin, RJ; Scott, F; Cowie, A; Liu, DL, Climate change impacts on rainfed cropping production systems in the tropics and the case of smallholder farms in North-west Cambodia, ENVIRONMENT DEVELOPMENT AND SUSTAINABILITY
11159712	6715408	TRUE	Touch, V; Martin, RJ; Scott, JF; Cowie, A; Liu, DL, Climate change adaptation options in rainfed upland cropping systems in the wet tropics: A case study of smallholder farms in North-West Cambodia, JOURNAL OF ENVIRONMENTAL MANAGEMENT
11159713	6715409	TRUE	Brown, HCP; Smit, B; Somorin, OA; Sonwa, DJ; Nkem, JN, Climate Change and Forest Communities: Prospects for Building Institutional Adaptive Capacity in the Congo Basin Forests, AMBIO
11159714	6715411	TRUE	Gram, G; Vaast, P; van der Wolf, J; Jassogne, L, Local tree knowledge can fast-track agroforestry recommendations for coffee smallholders along a climate gradient in Mount Elgon, Uganda, AGROFORESTRY SYSTEMS
11159715	6715415	TRUE	Nyamadzawo, G; Wuta, M; Nyamangara, J; Nyamugafata, P; Chirinda, N, Optimizing dambo (seasonal wetland) cultivation for climate change adaptation and sustainable crop production in the smallholder farming areas of Zimbabwe, INTERNATIONAL JOURNAL OF AGRICULTURAL SUSTAINABILITY
11159736	6715416	TRUE	Ofoegbu, C; Chirwa, P; Francis, J; Babalola, F, Assessing vulnerability of rural communities to climate change A review of implications for forest-based livelihoods in South Africa, INTERNATIONAL JOURNAL OF CLIMATE CHANGE STRATEGIES AND MANAGEMENT
11159739	6715419	TRUE	Khan, MTR; Omprakash, MD, ADAPTATION THROUGH WATERSHED MANAGEMENT IN THE CHANGING CLIMATE, GLOBAL NEST JOURNAL
11159740	6715420	TRUE	Bastakoti, RC; Gupta, J; Babel, MS; van Dijk, MP, Climate risks and adaptation strategies in the Lower Mekong River basin, REGIONAL ENVIRONMENTAL CHANGE
11159741	6715423	TRUE	Razafindrabe, BHN; Kada, R; Arima, M; Inoue, S, Analyzing flood risk and related impacts to urban communities in central Vietnam, MITIGATION AND ADAPTATION STRATEGIES FOR GLOBAL CHANGE
11159743	6715425	TRUE	Oka, N; Higashimaki, T; Witharana, DDP; Wakeyo, MB, CONSTRAINS AND CONSENSUS ON WATER USE AND LAND ALLOCATION IN MINOR SCHEME TANKS IN THE DRY ZONE OF SRI LANKA, SCIENTIFIC PAPERS-SERIES MANAGEMENT ECONOMIC ENGINEERING IN AGRICULTURE AND RURAL DEVELOPMENT
11159744	6940927	TRUE	Cozzini, S; Intsiful, J; Baricevic, M; Diallo, A; De Giorgi, F, e-Infrastructure for Climate Adaptation Policies: the UNDP/AAP Activities, 2013 IST-AFRICA CONFERENCE AND EXHIBITION (IST-AFRICA)
11159745	6940928	TRUE	Tall, A.; Patt, A.G.; Fritz, S., Reducing vulnerability to hydro-meteorological extremes in Africa. A qualitative assessment of national climate disaster management policies: Accounting for heterogeneity, Weather Clim. Extremes
11159756	6940929	TRUE	Nhamo, G; Muchuru, S, Climate adaptation in the public health sector in Africa: Evidence from United Nations Framework Convention on Climate Change National Communications, JAMBA-JOURNAL OF DISASTER RISK STUDIES
11159757	6940930	TRUE	Ado, A.M.; Savadogo, P.; Abdoul-Azize, H.T., Livelihood strategies and household resilience to food insecurity: insight from a farming community in Aguie district of Niger,
11159758	6940931	TRUE	Stringer, LC; Dougill, AJ; Dyer, JC; Vincent, K; Fritzsche, F; Leventon, J; Falcao, MP; Manyakaidze, P; Syampungani, S; Powell, P; Kalaba, G, Advancing climate compatible development: lessons from southern Africa, REGIONAL ENVIRONMENTAL CHANGE
11159759	6940934	TRUE	Faiyetole, AA; Adesina, FA, Regional response to climate change and management: an analysis of Africa's capacity, INTERNATIONAL JOURNAL OF CLIMATE CHANGE STRATEGIES AND MANAGEMENT
11159760	6940935	TRUE	Shinn, JE; King, B; Young, KR; Crews, KA, Variable adaptations: Micro-politics of environmental displacement in the Okavango Delta, Botswana, GEOFORUM
11159761	6940937	TRUE	Rouabhi, A; Mekhlouf, A; Mokhneche, S; Elkolli, N, Farming transitions under Socio-economic and climatic constraints in the southern part of Setif, Algeria, JOURNAL OF AGRICULTURE AND ENVIRONMENT FOR INTERNATIONAL DEVELOPMENT
11159762	6940938	TRUE	Ebhuoma, E; Simatele, D, Defying the odds: Climate variability, asset adaptation and food security nexus in the Delta State of Nigeria, INTERNATIONAL JOURNAL OF DISASTER RISK REDUCTION
11159763	6940946	TRUE	Abraham, EM, Understanding climate change adaptation in Africa: key considerations, MANAGEMENT OF ENVIRONMENTAL QUALITY
11159764	6940950	TRUE	Romankiewicz, C; Doevenspeck, M; Brandt, M; Samimi, C, Adaptation as by-product: migration and environmental change in Nguith, Senegal, ERDE
11159765	6940951	TRUE	Kuehne, G, How Do Farmers' Climate Change Beliefs Affect Adaptation to Climate Change?, SOCIETY & NATURAL RESOURCES
11159816	6940953	TRUE	Suckall, N; Tompkins, E; Stringer, L, Identifying trade-offs between adaptation, mitigation and development in community responses to climate and socio-economic stresses: Evidence from Zanzibar, Tanzania, APPLIED GEOGRAPHY
11159817	6940954	TRUE	Chanza, N., Limits to climate change adaptation in Zimbabwe: Insights, experiences and lessons,
11159818	6940956	TRUE	Mkonda, MY; He, XH; Festin, ES, Comparing Smallholder Farmers' Perception of Climate Change with Meteorological Data: Experience from Seven Agroecological Zones of Tanzania, WEATHER CLIMATE AND SOCIETY
11159819	6940957	TRUE	Penot, E; Fevre, V; Flodrops, P; Razafimahatratra, HM, Conservation Agriculture to buffer and alleviate the impact of climatic variations in Madagascar: farmers' perception, CAHIERS AGRICULTURES
11159820	6940958	TRUE	Lalika, MCS; Meire, P; Ngaga, YM; Chang'a, L, Understanding watershed dynamics and impacts of climate change and variability in the Pangani River Basin, Tanzania, ECOHYDROLOGY & HYDROBIOLOGY
11159821	6940959	TRUE	Cherif, S; Leal, W; Azeiteiro, UM, The role of farmers' perceptions in coping with climate change in Sub-Saharan Africa, INTERNATIONAL JOURNAL OF GLOBAL WARMING
11159822	6940960	TRUE	Asante, WA; Acheampong, E; Kyereh, E; Kyereh, B, Farmers' perspectives on climate change manifestations in smallholder cocoa farms and shifts in cropping systems in the forest-savannah transitional zone of Ghana, LAND USE POLICY
11159823	6940963	TRUE	Vardakoulias, O.; Nicholles, N., A socio-economic evaluation of community-based adaptation: A case study in Dakoro, Niger, Handbook of Climate Change Adaptation
11159824	6940964	TRUE	Ologeh, I.O.; Akarakiri, J.B.; Adesina, F.A., Constraints and limits to climate change adaptation efforts in Nigeria,
11159825	6940970	TRUE	Parvin, G.A.; Rahman, R.; Fujita, K.; Shaw, R., Overview of flood management actions and policy planning in Bangladesh,
11160006	6940984	TRUE	Islam, M.; Mohd-Nor, R., Business engagement in adaptation to climate change in developing countries: A case study based on behavioral perspective, International Journal of Business & Society
11160007	6940987	TRUE	Imam, MA; Haque, MZ; Yunus, S, Scarcity to solution: perceived reasons for safe drinking water scarcity and local coping responses in a coastal village of Bangladesh, JOURNAL OF WATER AND CLIMATE CHANGE
11160008	6940988	TRUE	De, UK, Farmer's Response to Changing Climate in North East India, 2ND ISM INTERNATIONAL STATISTICAL CONFERENCE 2014 (ISM-II): EMPOWERING THE APPLICATIONS OF STATISTICAL AND MATHEMATICAL SCIENCES
11160009	6940989	TRUE	Forino, G; von Meding, J; Brewer, G, Community based initiatives to mainstream climate change adaptation into disaster risk reduction: evidence from the Hunter Valley (Australia), LOCAL ENVIRONMENT
11160010	6940991	TRUE	Kiem, AS; Austin, EK, Drought and the future of rural communities: Opportunities and challenges for climate change adaptation in regional Victoria, Australia, GLOBAL ENVIRONMENTAL CHANGE-HUMAN AND POLICY DIMENSIONS
11160011	6940994	TRUE	Wu, LL; Zhang, JY; Lu, QC; Rahman, ABMS, Tourist adaptation behavior in response to climate disasters in Bangladesh, JOURNAL OF SUSTAINABLE TOURISM
11160012	6940997	TRUE	Saroar, M.M., Ecosystem-Based Adaptation (EbA) for Coastal Resilience Against Water Related Disasters in Bangladesh,
11160013	6940998	TRUE	Simon, K.; Diprose, G.; Thomas, A.C., Community-led initiatives for climate adaptation and mitigation, Kotuitui
11160014	6941000	TRUE	Bowen, KJ; Miller, F; Dany, V; McMichael, AJ; Friel, S, Enabling environments? Insights into the policy context for climate change and health adaptation decision-making in Cambodia, CLIMATE AND DEVELOPMENT
11160015	6941001	TRUE	Muttaqin, Z.; Yulianti, A.; Karmanah, K., Climate village program (ProKlim) in Simurugul Sub-Village, Margawati Village, Garut Kota Sub-Regency, Garut Regency, West Java Province, Indonesia,
11160036	6941002	TRUE	Wheeler, SA; Marning, A, Turning water into wine: Exploring water security perceptions and adaptation behaviour amongst conventional, organic and biodynamic grape growers, LAND USE POLICY
11160037	6941003	TRUE	Heikkila, T; Gerlak, AK; Bell, AR; Schmeier, S, Adaptation in a transboundary river basin: Linking stressors and adaptive capacity within the Mekong River Commission, ENVIRONMENTAL SCIENCE & POLICY
11160038	6941004	TRUE	Kulpraneet, A, Coastal household adaptation cost requirements to sea level rise impacts, MITIGATION AND ADAPTATION STRATEGIES FOR GLOBAL CHANGE
11160039	6941005	TRUE	Sanderson, MR; Curtis, AL, Culture, climate change and farm-level groundwater management: An Australian case study, JOURNAL OF HYDROLOGY
11160040	6941006	TRUE	Garschagen, M, Resilience and organisational institutionalism from a cross-cultural perspective: an exploration based on urban climate change adaptation in Vietnam, NATURAL HAZARDS
11160041	6941009	TRUE	Bahinipati, CS; Patnaik, U, The damages from climatic extremes in India: do disaster-specific and generic adaptation measures matter?, ENVIRONMENTAL ECONOMICS AND POLICY STUDIES
11160042	6941019	TRUE	Sapkota, P; Keenan, RJ; Ojha, HR, Co-evolving dynamics in the social-ecological system of community forestry-prospects for ecosystem-based adaptation in the Middle Hills of Nepal, REGIONAL ENVIRONMENTAL CHANGE
11160043	6941020	TRUE	Leonard, S; Parsons, M; Olawsky, K; Kofod, F, The role of culture and traditional knowledge in climate change adaptation: Insights from East Kimberley, Australia, GLOBAL ENVIRONMENTAL CHANGE-HUMAN AND POLICY DIMENSIONS
11160044	6941025	TRUE	Balaji, V; Ganapuram, S; Devakumar, C, Communication and capacity building to advance adaptation strategies in agriculture in the context of climate change in India, DECISION
11160045	6941026	TRUE	Hoque, SF; Quinn, C; Sallu, S, Differential livelihood adaptation to social-ecological change in coastal Bangladesh, REGIONAL ENVIRONMENTAL CHANGE
11160106	6941027	TRUE	Xu, JC; Grumbine, RE, Building ecosystem resilience for climate change adaptation in the Asian highlands, WILEY INTERDISCIPLINARY REVIEWS-CLIMATE CHANGE
11160107	6941029	TRUE	Keenan, RJ; Nitschke, C, Forest management options for adaptation to climate change: a case study of tall, wet eucalypt forests in Victoria's Central Highlands region, AUSTRALIAN FORESTRY
11160108	6941030	TRUE	Fleming, A; Rickards, L; Dowd, AM, Understanding convergence and divergence in the framing of climate change responses: An analysis of two wine companies, ENVIRONMENTAL SCIENCE & POLICY
11160109	6941033	TRUE	Li, XY; Yang, Y; Liu, Y; Liu, H, Impacts and effects of government regulation on farmers' responses to drought: A case study of North China Plain, JOURNAL OF GEOGRAPHICAL SCIENCES
11160111	6941043	TRUE	Kirby, M; Bark, R; Connor, J; Qureshi, ME; Keyworth, S, Sustainable irrigation: How did irrigated agriculture in Australia's Murray-Darling Basin adapt in the Millennium Drought?, AGRICULTURAL WATER MANAGEMENT
11160114	6941048	TRUE	McDonald, K.; Stewart, B.; Dingle, G., Managing multi-purpose leisure facilities in a time of climate change, Managing Leis.
11160115	6941050	TRUE	Nguyen, Q; Hoang, MH; Oborn, I; van Noordwijk, M, Multipurpose agroforestry as a climate change resiliency option for farmers: an example of local adaptation in Vietnam, CLIMATIC CHANGE
11160176	6941053	TRUE	Islam, M; Mohd-Nor, R, BUSINESS ENGAGEMENT IN ADAPTATION TO CLIMATE CHANGE IN DEVELOPING COUNTRIES: A CASE STUDY BASED ON BEHAVIORAL PERSPECTIVE, INTERNATIONAL JOURNAL OF BUSINESS AND SOCIETY
11160178	6941054	TRUE	Fakhruddin, S.H.M.; Rahman, J., Coping with coastal risk and vulnerabilities in Bangladesh, Int. J. Disaster Risk Reduct.
11160179	6941056	TRUE	Herrador-Valencia, D; Paredes, M, Climate change and small-scale agriculture in the Ecuadorian Andes: a study on local perceptions and adaptation strategies, JOURNAL OF LATIN AMERICAN GEOGRAPHY
11160180	6941058	TRUE	Neves, FM; Chang, MY; Pierri, N, Climate Change Coping Strategy Expressed in the Federal Public Policies in Brazil, DESENVOLVIMENTO E MEIO AMBIENTE
11160181	6941060	TRUE	Fernandes, GCM; Boehs, AE; Denham, SA; Nitschke, RG; Martini, JG, Rural families' interpretations of experiencing unexpected transition in the wake of a natural disaster, CADERNOS DE SAUDE PUBLICA
11160182	6941064	TRUE	Lindsay, A., Social learning as an adaptive measure to prepare for climate change impacts on water provision in Peru, J. Environ. Stud. Sci.
11160183	6941067	TRUE	de la Riva, M.V.; Lindner, A.; Pretzsch, J., Assessing adaptation - Climate change and indigenous livelihood in the Andes of Bolivia, J. Agric. Rural Dev. Trop. Subtrop.
11160184	6941068	TRUE	Jacobi, J; Schneider, M; Mariscal, MP; Huber, S; Weidmann, S; Bottazzi, P; Rist, S, Farm Resilience in Organic and Nonorganic Cocoa Farming Systems in Alto Beni, Bolivia, AGROECOLOGY AND SUSTAINABLE FOOD SYSTEMS
11160185	6941074	TRUE	Clar, C; Steurer, R, Why popular support tools on climate change adaptation have difficulties in reaching local policy-makers: Qualitative insights from the UK and Germany, ENVIRONMENTAL POLICY AND GOVERNANCE
11160216	6941076	TRUE	Hovelsrud, GK; Karlsson, M; Olsen, J, Prepared and flexible: Local adaptation strategies for avalanche risk, COGENT SOCIAL SCIENCES
11160217	6941079	TRUE	Aguiar, FC; Bentz, J; Silva, JMN; Fonseca, AL; Swart, R; Santos, FD; Penha-Lopes, G, Adaptation to climate change at local level in Europe: An overview, ENVIRONMENTAL SCIENCE & POLICY
11160218	6941083	TRUE	Crabbe, A; Wiering, M; Liefferink, D, Adapting flood management to climate change: comparing policy frames and governance practices in the Low Countries, JOURNAL OF WATER AND CLIMATE CHANGE
11160220	6941097	TRUE	Gersonius, B; van Buuren, A; Zethof, M; Kelder, E, Resilient flood risk strategies: institutional preconditions for implementation, ECOLOGY AND SOCIETY
11160222	6941099	TRUE	Daugstad, K, Resilience in Mountain Farming in Norway, SUSTAINABILITY
11160223	6941104	TRUE	Koerth, J.; Massmann, F.; Dittmann, S., Community-based adaptation to climate change in Schleswig-Holstein: Challenges and opportunities,
11160224	6941107	TRUE	Alonso, AD; Liu, Y, Climate Change in the Wine Sector of an Ultra-Peripheral European Region: A Case Study, AGROECOLOGY AND SUSTAINABLE FOOD SYSTEMS
11160256	6941114	TRUE	Perini, K; Sabbion, P, Green-blue infrastructure in urban areas, the case of the Bronx River (NYC) and Paillon (Nice), TECHNE-JOURNAL OF TECHNOLOGY FOR ARCHITECTURE AND ENVIRONMENT
11160257	6941116	TRUE	Nolet, E, "Are you prepared?' Representations and management of floods in Lomanikoro, Rewa (Fiji), DISASTERS
11160258	6941117	TRUE	McNamara, KE; Prasad, SS, Coping with extreme weather: communities in Fiji and Vanuatu share their experiences and knowledge, CLIMATIC CHANGE
11160259	6941119	TRUE	Allgood, L; McNamara, KE, Climate-induced migration: Exploring local perspectives in Kiribati, SINGAPORE JOURNAL OF TROPICAL GEOGRAPHY
11160260	6941120	TRUE	Becken, S; Wilson, J, The impacts of weather on tourist travel, TOURISM GEOGRAPHIES
11160261	6941125	TRUE	Hassan, K; Higham, J; Wooliscroft, B; Hopkins, D, Climate change and world heritage: a cross-border analysis of the Sundarbans (Bangladesh-India), JOURNAL OF POLICY RESEARCH IN TOURISM LEISURE AND EVENTS
11160262	6941127	TRUE	Hansen, GJA; Gaeta, JW; Hansen, JF; Carpenter, SR, Learning to Manage and Managing to Learn: Sustaining Freshwater Recreational Fisheries in a Changing Environment, FISHERIES
11160263	6941128	TRUE	Tsiolis, K.S.; Efthimiou, G.S., Forest-fire protection infrastructures in natural protected areas with management bodies in Greece, For. Ideas
11160264	6941129	TRUE	McDowell, G; Huggel, C; Frey, H; Wang, FM; Cramer, K; Ricciardi, V, Adaptation action and research in glaciated mountain systems: Are they enough to meet the challenge of climate change?, GLOBAL ENVIRONMENTAL CHANGE-HUMAN AND POLICY DIMENSIONS
11160265	6941131	TRUE	Paukert, CP; Glazer, BA; Hansen, GJA; Irwin, BJ; Jacobson, PC; Kershner, JL; Shuter, BJ; Whitney, JE; Lynch, AJ, ADAPTING INLAND FISHERIES MANAGEMENT TO A CHANGING CLIMATE, FISHERIES
11160287	6941134	TRUE	Fidel, M.; Kliskey, A.; Alessa, L.; Sutton, O.O.P., Walrus harvest locations reflect adaptation: a contribution from a community-based observation network in the Bering Sea, Polar Geogr.
11160288	6941135	TRUE	Chuang, HW; Yang, SR; Ou, T; Lin, TP, CLIMATIC ADAPTATION OF COASTAL COMMUNITIES ON THE SOUTHWEST OF TAIWAN, JOURNAL OF MARINE SCIENCE AND TECHNOLOGY-TAIWAN
11160289	6941136	TRUE	Bauer, A; Steurer, R, National Adaptation Strategies, what else? Comparing adaptation mainstreaming in German and Dutch water management, REGIONAL ENVIRONMENTAL CHANGE
11160290	6941138	TRUE	Metcalf, SJ; van Putten, EI; Frusher, S; Marshall, NA; Tull, M; Caputi, N; Haward, M; Hobday, AJ; Holbrook, NJ; Jennings, SM; Pecl, GT; Shaw, J, Measuring the vulnerability of marine social-ecological systems: a prerequisite for the identification of climate change adaptations, ECOLOGY AND SOCIETY
11160291	6941139	TRUE	Butler, WH; Deyle, RE; Mutnansky, C, Low-Regrets Incrementalism: Land Use Planning Adaptation to Accelerating Sea Level Rise in Florida's Coastal Communities, JOURNAL OF PLANNING EDUCATION AND RESEARCH
11160292	6941141	TRUE	Yerri, SR; Piratla, KR; Ross, BE; Harrison, DM, Synthesis of Water Infrastructure Adaptation Practices in US Coastal Regions, CONSTRUCTION RESEARCH CONGRESS 2018: INFRASTRUCTURE AND FACILITY MANAGEMENT
11160293	6941144	TRUE	Fournier, M; Larrue, C; Alexander, M; Hegger, D; Bakker, M; Pettersson, M; Crabbe, A; Mees, H; Chorynski, A, Flood risk mitigation in Europe: how far away are we from the aspired forms of adaptive governance?, ECOLOGY AND SOCIETY
11160294	6941145	TRUE	Nizami, A.; Ali, J.; Zulfiqar, M., Climate change, hydro-meteorological hazards and adaptation for sustainable livelihood in Chitral Pakistan, Sarhad J. Agri.
11160295	6941146	TRUE	Kirchhoff, CJ; Watson, PL, Are Wastewater Systems Adapting to Climate Change?, JOURNAL OF THE AMERICAN WATER RESOURCES ASSOCIATION
11160327	6941148	TRUE	Mycoo, MA, Autonomous household responses and urban governance capacity building for climate change adaptation: Georgetown, Guyana, URBAN CLIMATE
11160328	6941149	TRUE	Yamashita, S; Matsuda, S; Watanabe, R; Shimatani, Y; Moriyama, T; Hayashi, H; Iyooka, H; Hamada, T; Yamashita, T; Kakudo, K; Minagawa, T, A Registration System for Preventing/Mitigating Urban Flood Disasters as One Way to Smartly Adapt to Climate Change in Japanese Cities, INTERNATIONAL REVIEW FOR SPATIAL PLANNING AND SUSTAINABLE DEVELOPMENT
11160329	6941150	TRUE	Kontar, YY; Bhatt, US; Lindsey, SD; Plumb, EW; Thoman, RL, Interdisciplinary approach to hydrological hazard mitigation and disaster response and effects of climate change on the occurrence of flood severity in central Alaska, EXTREME HYDROLOGICAL EVENTS
11160330	6941151	TRUE	Fadul, E; Masih, I; De Fraiture, C, Adaptation strategies to cope with low, high and untimely floods: Lessons from the Gash spate irrigation system, Sudan, AGRICULTURAL WATER MANAGEMENT
11160331	6941152	TRUE	Lorencova, EK; Louckova, B; Vackaru, D, Perception of Climate Change Risk and Adaptation in the Czech Republic, CLIMATE
11160332	6941153	TRUE	Currenti, R; Pearce, T; Salabogi, T; Vuli, L; Salabogi, K; Doran, B; Kitson, R; Ford, J, Adaptation to Climate Change in an Interior Pacific Island Village: a Case Study of Nawairuku, Ra, Fiji, HUMAN ECOLOGY
11160336	6941155	TRUE	Kamal, ASMM; Shamsudduha, M; Ahmed, B; Hassan, SMK; Islam, MS; Kelman, I; Fordham, M, Resilience to flash floods in wetland communities of northeastern Bangladesh, INTERNATIONAL JOURNAL OF DISASTER RISK REDUCTION
11160349	6941157	TRUE	Roy, R., Evaluating the suitability of community-based adaptation: A case study of bangladesh,
11160354	6941159	TRUE	Michalak, D, EFFECTIVE WATER MANAGEMENT AS AN IMPORTANT ELEMENT OF ADAPTATION TO CLIMATE CHANGE IN POLISH CITIES, EKONOMIA I SRODOWISKO-ECONOMICS AND ENVIRONMENT
11160356	6941160	TRUE	Parvin, GA; Shimi, AC; Shaw, R; Biswas, C, Flood in a Changing Climate: The Impact on Livelihood and How the Rural Poor Cope in Bangladesh, CLIMATE
11160358	6941161	TRUE	Shah, AA; Ye, JZ; Abid, M; Ullah, R, Determinants of flood risk mitigation strategies at household level: a case of Khyber Pakhtunkhwa (KP) province, Pakistan, NATURAL HAZARDS
11160360	6941162	TRUE	Poussin, JK; Botzen, WJW; Aerts, JCJH, Stimulating flood damage mitigation through insurance: an assessment of the French CatNat system, ENVIRONMENTAL HAZARDS-HUMAN AND POLICY DIMENSIONS
11160362	6941163	TRUE	Osberghaus, D, The determinants of private flood mitigation measures in Germany - Evidence from a nationwide survey, ECOLOGICAL ECONOMICS
11160363	6941164	TRUE	Ghozali, A; Ariyaningsih; Sukmara, RB; Aulia, BU, A Comparative Study of Climate Change Mitigation and Adaptation on Flood Management Between Ayutthaya City (Thailand) and Samarinda City (Indonesia), CITIES 2015: INTELLIGENT PLANNING TOWARDS SMART CITIES
11160364	6941165	TRUE	Mullin, CA; Kirchhoff, CJ, Marshaling Adaptive Capacities within an Adaptive Management Framework to Enhance the Resiliency of Wastewater Systems, JOURNAL OF THE AMERICAN WATER RESOURCES ASSOCIATION
11160365	6941166	TRUE	Fitzgerald, J; Lenhart, J, Eco-districts: can they accelerate urban climate planning?, ENVIRONMENT AND PLANNING C-GOVERNMENT AND POLICY
11160376	6941167	TRUE	Gunawansa, A; Kua, HW, A Comparison of Climate Change Mitigation and Adaptation Strategies for the Construction Industries of Three Coastal Territories, SUSTAINABLE DEVELOPMENT
11160377	6941168	TRUE	Hori, Y; Gough, WA; Tam, B; Tsuji, LJS, Community vulnerability to changes in the winter road viability and longevity in the western James Bay region of Ontario's Far North, REGIONAL ENVIRONMENTAL CHANGE
11160378	6941169	TRUE	Petzold, J, Social adaptability in ecotones: sea-level rise and climate change adaptation in Flushing and the Isles of Scilly, UK, ISLAND STUDIES JOURNAL
11160379	6941170	TRUE	Leal, W; Balogun, AL; Olayide, OE; Azeiteiro, UM; Ayal, DY; Munoz, PDC; Nagy, GJ; Bynoe, P; Oguge, O; Toamukum, NY; Saroar, M; Li, CL, Assessing the impacts of climate change in cities and their adaptive capacity: Towards transformative approaches to climate change adaptation and poverty reduction in urban areas in a set of developing countries, SCIENCE OF THE TOTAL ENVIRONMENT
11160380	6941171	TRUE	Slatmo, E; Nilsson, K; Turunen, E, Implementing Green Infrastructure in Spatial Planning in Europe, LAND
11160381	6941172	TRUE	Schofield, D; Gubbels, F, Informing notions of climate change adaptation: a case study of everyday gendered realities of climate change adaptation in an informal settlement in Dar es Salaam, ENVIRONMENT AND URBANIZATION
11160382	6941174	TRUE	Jin, JJ; Francisco, H, Sea-level rise adaptation measures in local communities of Zhejiang Province, China, OCEAN & COASTAL MANAGEMENT
11160383	6941175	TRUE	CzakÃƒÂ³, V., Drowning the suburb: settlement planning and climate change adaptation in a Hungarian metropolitan area, Urban Res. Pract.
11160384	6941176	TRUE	Broto, VC; Bulkeley, H, A survey of urban climate change experiments in 100 cities, GLOBAL ENVIRONMENTAL CHANGE-HUMAN AND POLICY DIMENSIONS
11160385	6941178	TRUE	Miao, Q; Feeney, MK; Zhang, FX; Welch, EW; Sriraj, PS, Through the storm: Transit agency management in response to climate change, TRANSPORTATION RESEARCH PART D-TRANSPORT AND ENVIRONMENT
11160411	6941179	TRUE	Wang, YC; Shen, JK; Xiang, WN; Wang, JQ, Identifying characteristics of resilient urban communities through a case study method, JOURNAL OF URBAN MANAGEMENT
11160414	6941180	TRUE	Dubois, C; Cloutier, G; Rynning, MKR; Adolphe, L; Bonhomme, M, City and Building Designers, and Climate Adaptation, BUILDINGS
11160416	6941183	TRUE	Aleke, BI; Nhamo, G, Information and communication technology and climate change adaptation: Evidence from selected mining companies in South Africa, JAMBA-JOURNAL OF DISASTER RISK STUDIES
11160418	6941184	TRUE	Sanchez, FG; Solecki, WD; Batalla, CR, Climate change adaptation in Europe and the United States: A comparative approach to urban green spaces in Bilbao and New York City, LAND USE POLICY
11160420	6941185	TRUE	Buchanan, MK; Oppenheimer, M; Parris, A, Values, Bias, and Stressors Affect Intentions to Adapt to Coastal Flood Risk: A Case Study from New York City, WEATHER CLIMATE AND SOCIETY
11160421	6941187	TRUE	Murtagh, N.; Gatersleben, B.; Fife-Schaw, C., Occupants' motivation to protect residential building stock from climate-related overheating: A study in southern England, J. Clean. Prod.
11160423	6941191	TRUE	Keessen, A; Ernst, W, The adaptiveness of law put to the test: Dealing with water scarcity in a water-rich country, PROCEEDINGS OF THE 36TH IAHR WORLD CONGRESS: DELTAS OF THE FUTURE AND WHAT HAPPENS UPSTREAM
11160424	6941193	TRUE	Hendell, MA; Colombert, M; Diab, Y; Royon, L, Measurement of the Cooling Efficiency of Pavement-watering as an Urban Heat Island Mitigation Technique, JOURNAL OF SUSTAINABLE DEVELOPMENT OF ENERGY WATER AND ENVIRONMENT SYSTEMS-JSDEWES
11160425	6941195	TRUE	Kalafatis, SE, Comparing Climate Change Policy Adoption and Its Extension across Areas of City Policymaking, POLICY STUDIES JOURNAL
11160458	6941199	TRUE	Aldum, N; Duggie, J; Robson, BJ, Climate change adaptation support tools in Australia, REGIONAL ENVIRONMENTAL CHANGE
11160459	6941200	TRUE	Ryan, PC; Stewart, MG, Cost-benefit analysis of climate change adaptation for power pole networks, CLIMATIC CHANGE
11160460	6941201	TRUE	Carlson, K; McCormick, S, American adaptation: Social factors affecting new developments to address climate change, GLOBAL ENVIRONMENTAL CHANGE-HUMAN AND POLICY DIMENSIONS
11160461	6941203	TRUE	Song, J.; Yang, R.; Chang, Z.; Li, W.; Wu, J., Adaptation as an indicator of measuring low-impact-development effectiveness in urban flooding risk mitigation,
11160463	6941205	TRUE	Lesnikowski, A.C.; Ford, J.D.; Berrang-Ford, L.; Barrera, M.; Heymann, J., How are we adapting to climate change? A global assessment, Mitigation Adapt. Strateg. Global Change
11160464	6941207	TRUE	Scholten, P; Keskitalo, ECH; Meijerink, S, Bottom-up initiatives toward climate change adaptation in cases in the Netherlands and the UK: a complexity leadership perspective, ENVIRONMENT AND PLANNING C-GOVERNMENT AND POLICY
11160516	6941209	TRUE	Porio, E, Climate Change Vulnerability and Adaptation in Metro Manila Challenging Governance and Human Security of Urban Poor Communities, ASIAN JOURNAL OF SOCIAL SCIENCE
11160517	6941210	TRUE	Hussain, A.; Ali, S.; Begum, S.; Hussain, I.; Ali, H., Climate change perspective in mountain area: Impacts and adaptations in naltar valley, western himalaya, Pakistan,
11160518	6941211	TRUE	Tschirhart, C; Mistry, J; Berardi, A; Bignante, E; Simpson, M; Haynes, L; Benjamin, R; Albert, G; Xavier, R; Robertson, B; Davis, O; Verwer, C; de Ville, G; Jafferally, D, Learning from one another: evaluating the impact of horizontal knowledge exchange for environmental management and governance, ECOLOGY AND SOCIETY
11160519	6941212	TRUE	Janif, SZ; Nunn, PD; Geraghty, P; Aalbersberg, W; Thomas, FR; Camailakeba, M, Value of traditional oral narratives in building climate-change resilience: insights from rural communities in Fiji, ECOLOGY AND SOCIETY
11160520	6941213	TRUE	Tatlonghari, G.T., Gendered adaptations to climate change: A case study from the Philippines, Research, Action and Policy: Addressing the Gendered Impacts of Climate Change
11160521	6941214	TRUE	Nahayo, L; Mupenzi, C; Kayiranga, A; Karamage, F; Ndayisaba, F; Nyesheja, EM; Li, LH, Early alert and community involvement: approach for disaster risk reduction in Rwanda, NATURAL HAZARDS
11160523	6941216	TRUE	Walch, C, Adaptive governance in the developing world: disaster risk reduction in the State of Odisha, India, CLIMATE AND DEVELOPMENT
11160524	6941217	TRUE	Sajise, AJU; Ramirez, PJB; Perez, ML; Arias, JKB; Zamora, GJ, Determinants of Climate Change Adaptive Behavior in Coastal Communities in Southeast Asia, ASIAN JOURNAL OF AGRICULTURE AND DEVELOPMENT
11160552	6941220	TRUE	Hossain, MZ; Rahman, MAU, Adaptation to climate change as resilience for urban extreme poor: lessons learned from targeted asset transfers programmes in Dhaka city of Bangladesh, ENVIRONMENT DEVELOPMENT AND SUSTAINABILITY
11160554	6941221	TRUE	Venugopal, S; Gau, R; Appau, S; Sample, KL; Pereira, RCF, Adapting traditional livelihood practices in the face of environmental disruptions in subsistence communities, JOURNAL OF BUSINESS RESEARCH
11160556	6941223	TRUE	Smucker, TA; Wisner, B; Mascarenhas, A; Munishi, P; Wangui, EE; Sinha, G; Weiner, D; Bwenge, C; Lovell, E, Differentiated livelihoods, local institutions, and the adaptation imperative: Assessing climate change adaptation policy in Tanzania, GEOFORUM
11160558	6941224	TRUE	Takasaki, Y, Learning from disaster: community-based marine protected areas in Fiji, ENVIRONMENT AND DEVELOPMENT ECONOMICS
11160560	6941225	TRUE	Ceesay, A.; Wolff, M.; Njie, E.; Kah, M.; Kon, T., Adapting to the Inevitable: The Case of Tanbi Wetland National Park, The Gambia,
11160561	6941226	TRUE	Lai, J.Y.; Cheng, H.-H., Understanding adaptation: Lessons from local adaptive measures to coastal risks and hazards Ã¢â‚¬â€œ A case study of kukup water village, Malaysia,
11160562	6941228	TRUE	Volpato, G; King, EG, From cattle to camels: trajectories of livelihood adaptation and social-ecological resilience in a Kenyan pastoralist community, REGIONAL ENVIRONMENTAL CHANGE
11160563	6941230	TRUE	Tanyanyiwa, V.I.; Mudzingwa, N.M., Dry lands households' responses as a continuum of on and off farm strategies: Insights from Chivi, Zimbabwe,
11160564	6941231	TRUE	Bacud, S.T., Integration of Indigenous and Scientific Knowledge in Disaster Risk Reduction: Resilience Building of a Marginalized Sampaguita Growing Community in the Philippines, Procedia Eng.
11160565	6941232	TRUE	Fenton, A; Paavola, J; Tallontire, A, The Role of Microfinance in Household Livelihood Adaptation in Satkhira District, Southwest Bangladesh, WORLD DEVELOPMENT
11160609	6941233	TRUE	Konchar, KM; Staver, B; Salick, J; Chapagain, A; Joshi, L; Karki, S; Lo, S; Paudel, A; Subedi, P; Ghimire, SK, ADAPTING IN THE SHADOW OF ANNAPURNA: A CLIMATE TIPPING POINT, JOURNAL OF ETHNOBIOLOGY
11160611	6941234	TRUE	Shabib, D; Khan, S, Gender-sensitive adaptation policy-making in Bangladesh: status and ways forward for improved mainstreaming, CLIMATE AND DEVELOPMENT
11160613	6941235	TRUE	Xenarios, S; Gafurov, A; Schmidt-Vogt, D; Sehring, J; Manandhar, S; Hergarten, C; Shigaeva, J; Foggin, M, Climate change and adaptation of mountain societies in Central Asia: uncertainties, knowledge gaps, and data constraints, REGIONAL ENVIRONMENTAL CHANGE
11160615	6941236	TRUE	Robb, A; Payne, M; Stocker, L; Middle, G; Trosic, A, Development Control And Vulnerable Coastal Lands: Examples Of Australian Practice, URBAN POLICY AND RESEARCH
11160616	6941237	TRUE	Regmi, BR; Star, C; Paudyal, A; Karki, RC, Strengthening Climate Change Adaptation in Nepal: Needs and Perspectives, CLIMATE CHANGE IN THE ASIA-PACIFIC REGION
11160618	6941239	TRUE	Bunce, A; Ford, J; Harper, S; Edge, V, Vulnerability and adaptive capacity of Inuit women to climate change: a case study from Iqaluit, Nunavut, NATURAL HAZARDS
11160620	6941240	TRUE	Gippner, O; Dhakal, S; Sovacool, BK, Microhydro electrification and climate change adaptation in Nepal: socioeconomic lessons from the Rural Energy Development Program (REDP), MITIGATION AND ADAPTATION STRATEGIES FOR GLOBAL CHANGE
11160623	6941241	TRUE	Gabrielsson, S; Ramasar, V, Widows: agents of change in a climate of water uncertainty, JOURNAL OF CLEANER PRODUCTION
11160624	6941244	TRUE	Richards, Gabrielle; Frehs, Jim; Myers, Erin; Van Bibber, Marilyn, Commentary - The Climate Change and Health Adaptation Program: Indigenous Climate Leaders' Championing Adaptation Effort.,
11160625	6941245	TRUE	Richards, G; Frehs, J; Myers, E; Van Bibber, M, The Climate Change and Health Adaptation Program: Indigenous climate leaders' championing adaptation efforts, HEALTH PROMOTION AND CHRONIC DISEASE PREVENTION IN CANADA-RESEARCH POLICY AND PRACTICE
11160656	6941246	TRUE	Esplin, ED; Marlon, JR; Leiserowitz, A; Howe, PD, "Can You Take the Heat?" Heat-Induced Health Symptoms Are Associated with Protective Behaviors, WEATHER CLIMATE AND SOCIETY
11160657	6941247	TRUE	Kussel, G, ADAPTATION TO CLIMATE CHANGE - EVIDENCE FROM GERMAN HOUSEHOLDS, PROCEEDINGS OF THE 2ND INTERNATIONAL CONFERENCE ON ENERGY & ENVIRONMENT: BRINGING TOGETHER ENGINEERING AND ECONOMICS
11160658	6941248	TRUE	Sheehan, MC; Fox, MA; Kaye, C; Resnick, B, Integrating Health into Local Climate Response: Lessons from the US CDC Climate-Ready States and Cities Initiative, ENVIRONMENTAL HEALTH PERSPECTIVES
11160659	6941249	TRUE	White-Newsome, JL; Ekwurzel, B; Baer-Schultz, M; Ebi, KL; O'Neill, MS; Anderson, GB, Survey of County-Level Heat Preparedness and Response to the 2011 Summer Heat in 30 US States, ENVIRONMENTAL HEALTH PERSPECTIVES
11160663	6941251	TRUE	Parsons, L.; Chann, S., Mobilising hydrosocial power: Climate perception, migration and the small scale geography of water in Cambodia,
11160665	6941252	TRUE	Furu, P.; Van, D.K., Health impacts of climate and environmental change: Awareness and challenges to adaptation, Environ. Sci. Eng. (Subseries: Environ. Sci.)
11160670	6941256	TRUE	Lipset, D, The New State of Nature: Rising Sea-levels, Climate Justice, and Community-based Adaptation in Papua New Guinea (2003-2011), CONSERVATION & SOCIETY
11160672	6941258	TRUE	Barnett, J; McMichael, C, The effects of climate change on the geography and timing of human mobility, POPULATION AND ENVIRONMENT
11160700	6941260	TRUE	Loughran, K.; Elliott, J.R., Residential buyouts as environmental mobility: examining where homeowners move to illuminate social inequities in climate adaptation,
11160703	6941262	TRUE	Srikuta, P; Inmuong, U; Inmuong, Y; Bradshaw, P, Health Vulnerability of Households in Flooded Communities and Their Adaptation Measures: Case Study in Northeastern Thailand, ASIA-PACIFIC JOURNAL OF PUBLIC HEALTH
11160706	6941263	TRUE	Nunfam, VF; Oosthuizen, J; Adusei-Asante, K; Van Etten, EJ; Frimpong, K, Perceptions of climate change and occupational heat stress risks and adaptation strategies of mining workers in Ghana, SCIENCE OF THE TOTAL ENVIRONMENT
11160712	6941269	TRUE	Bowen, KJ; Alexander, D; Miller, F; Dany, V, Using Social Network Analysis to Evaluate Health-Related Adaptation Decision-Making in Cambodia, INTERNATIONAL JOURNAL OF ENVIRONMENTAL RESEARCH AND PUBLIC HEALTH
11160715	6941271	TRUE	Boeckmann, M; Zeeb, H, Using a Social Justice and Health Framework to Assess European Climate Change Adaptation Strategies, INTERNATIONAL JOURNAL OF ENVIRONMENTAL RESEARCH AND PUBLIC HEALTH
11160718	6941274	TRUE	Belanger, D; Abdous, B; Valois, P; Gosselin, P; Sidi, EAL, A multilevel analysis to explain self-reported adverse health effects and adaptation to urban heat: a cross-sectional survey in the deprived areas of 9 Canadian cities, BMC PUBLIC HEALTH
11160720	6941275	TRUE	Nunfam, VF; Adusei-Asante, K; Van Etten, EJ; Oosthuizen, J; Frimpong, K, Social impacts of occupational heat stress and adaptation strategies of workers: A narrative synthesis of the literature, SCIENCE OF THE TOTAL ENVIRONMENT
11160722	6941277	TRUE	Hintz, MJ; Luederitz, C; Lang, DJ; von Wehrden, H, Facing the heat: A systematic literature review exploring the transferability of solutions to cope with urban heat waves, URBAN CLIMATE
11160725	6941279	TRUE	Brink, E; Wamsler, C, Citizen engagement in climate adaptation surveyed: The role of values, worldviews, gender and place, JOURNAL OF CLEANER PRODUCTION
11160746	6941280	TRUE	Ekstrom, JA; Bedsworth, L, Adapting air quality management for a changing climate: Survey of local districts in California, JOURNAL OF THE AIR & WASTE MANAGEMENT ASSOCIATION
11160747	6941283	TRUE	Khalil, M.B.; Jacobs, B.C.; Kuruppu, N., Grassroots Technologies and Community Trust in Climate Change Adaptation: Learning from Coastal Settlements of Bangladesh,
11160748	6941284	TRUE	Dannenberg, A.L.; Rogerson, B.; Rudolph, L., Optimizing the health benefits of climate change policies using health impact assessment,
11160749	6941285	TRUE	Abbas, A; Amjath-Babu, TS; Kachele, H; Usman, M; Iqbal, MA; Arshad, M; Shahid, MA; Muller, K, Sustainable survival under climatic extremes: linking flood risk mitigation and coping with flood damages in rural Pakistan, ENVIRONMENTAL SCIENCE AND POLLUTION RESEARCH
11160750	6941289	TRUE	Orlove, B; Which, K; Zaval, L; Ungemach, C; Brugger, J; Dunbar, K; Jurt, C, Framing climate change in frontline communities: anthropological insights on how mountain dwellers in the USA, Peru, and Italy adapt to glacier retreat, REGIONAL ENVIRONMENTAL CHANGE
11160752	6941292	TRUE	Pandit, A.; Jain, A.; Singha, R.; Suting, A.; Jamir, S.; Pradhan, N.S.; Choudhury, D., Community perceptions and responses to climate variability: Insights from the Himalayas, Climate Change Adaptation Strategies - An Upstream-Downstr. Perspective
11160753	6941293	TRUE	Race, D; Mathew, S; Campbell, M; Hampton, K, Understanding climate adaptation investments for communities living in desert Australia: experiences of indigenous communities, CLIMATIC CHANGE
11160754	6941294	TRUE	Zhou, L; Xin, Z; Bai, L; Wan, FJ; Wang, YM; Sang, SW; Liu, SQ; Zhang, J; Liu, QY, Perceptions of Heat Risk to Health: A Qualitative Study of Professional Bus Drivers and Their Managers in Jinan, China, INTERNATIONAL JOURNAL OF ENVIRONMENTAL RESEARCH AND PUBLIC HEALTH
11160755	7850907	TRUE	Asfaw, S; Di Battista, F; Lipper, L, Agricultural Technology Adoption under Climate Change in the Sahel: Micro-evidence from Niger, JOURNAL OF AFRICAN ECONOMIES
11160786	7850908	TRUE	Vodounou, JBK; Doubogan, YO, Rural agriculture and adaptation strategies to the climate change in North Benin, CYBERGEO-EUROPEAN JOURNAL OF GEOGRAPHY
11160787	7850910	TRUE	Suckall, N; Fraser, E; Forster, P; Mkwambisi, D, Using a migration systems approach to understand the link between climate change and urbanisation in Malawi, APPLIED GEOGRAPHY
11160788	7850911	TRUE	Woldearegay, K.; Tamene, L.; Mekonnen, K.; Kizito, F.; Bossio, D., Fostering food security and climate resilience through integrated landscape restoration practices and rainwater harvesting/management in arid and semi-arid areas of Ethiopia, Rainwater-Smart Agric. in Arid and Semi-Arid Areas: Fostering the Use of Rainwater for Food Secur., Poverty Alleviation, Landsc. Restor. and Clim. Resil.
11160789	7850913	TRUE	Githunguri, CM; Lung'ahi, EG; Kabugu, J; Musili, R, Cassava Farming Transforming Livelihoods Among Smallholder Farmers in Mutomo a Semi-arid District in Kenya, ADAPTING AFRICAN AGRICULTURE TO CLIMATE CHANGE: TRANSFORMING RURAL LIVELIHOODS
11160790	7850914	TRUE	Snorek, J; Renaud, FG; Kloos, J, Divergent adaptation to climate variability: A case study of pastoral and agricultural societies in Niger, GLOBAL ENVIRONMENTAL CHANGE-HUMAN AND POLICY DIMENSIONS
11160791	7850915	TRUE	Archambault, CS, Re-creating the commons and re-configuring Maasai women's roles on the rangelands in the face of fragmentation, INTERNATIONAL JOURNAL OF THE COMMONS
11160792	7850916	TRUE	Barnard, M, SADC's response to climate change - the role of harmonised law and policy on mitigation in the energy sector, JOURNAL OF ENERGY IN SOUTHERN AFRICA
11160794	7850918	TRUE	Jordhus-Lier, D.; Saaghus, A.; Scott, D.; Ziervogel, G., Adaptation to flooding, pathway to housing or 'wasteful expenditure'? Governance configurations and local policy subversion in a flood-prone informal settlement in Cape Town, Geoforum
11160795	7850919	TRUE	Palframan, A, "In common nature": an ethnography of climate adaptation in the Lesotho Highlands, LOCAL ENVIRONMENT
11160837	7850920	TRUE	Kruger, L, The timing of agricultural production in hazard-prone areas to prevent losses at peak-risk periods: A case of Malawi, Madagascar and Mozambique, JAMBA-JOURNAL OF DISASTER RISK STUDIES
11160838	7850923	TRUE	Bhullar, L, Climate Change Adaptation and Water Policy: Lessons from Singapore, SUSTAINABLE DEVELOPMENT
11160840	7850924	TRUE	Gros, C.; Bailey, M.; Schwager, S.; Hassan, A.; Zingg, R.; Uddin, M.M.; Shahjahan, M.; Islam, H.; Lux, S.; Jaime, C.; Coughlan de Perez, E., Household-level effects of providing forecast-based cash in anticipation of extreme weather events: Quasi-experimental evidence from humanitarian interventions in the 2017 floods in Bangladesh,
11160842	7850925	TRUE	Saboohi, R; Barani, H; Khodagholi, M; Sarvestani, AA; Tahmasebi, A, Nomads' indigenous knowledge and their adaptation to climate changes in Semirom City in Central Iran, THEORETICAL AND APPLIED CLIMATOLOGY
11160847	7850927	TRUE	Baul, T.K.; McDonald, M.A., Agro-Biodiversity Management: Using Indigenous Knowledge to Cope with Climate Change in the Middle-Hills of Nepal,
11160849	7850928	TRUE	Fedele, G; Locatelli, B; Djoudi, H; Colloff, MJ, Reducing risks by transforming landscapes: Cross-scale effects of land-use changes on ecosystem services, PLOS ONE
11160851	7850929	TRUE	Jakku, E; Thorburn, PJ; Marshall, NA; Dowd, AM; Howden, SM; Mendham, E; Moon, K; Brandon, C, Learning the hard way: a case study of an attempt at agricultural transformation in response to climate change, CLIMATIC CHANGE
11160853	7850932	TRUE	Zhang, LL; Chai, ZZ; Zhang, Y; Geng, YF; Wang, YH, Ethnobotanical study of traditional edible plants used by the Naxi people during droughts, JOURNAL OF ETHNOBIOLOGY AND ETHNOMEDICINE
11160855	7850933	TRUE	Ingham, V; Islam, MR; Hicks, J, Adaptive flood mobilities in Bangladesh, MOBILITIES
11160876	7850935	TRUE	Dong, S.; Yi, S.L.; Yan, Z.L., Maintaining the human-natural systems of pastoralism in the himalayas of South Asia and China, Building Resil. of Hum.-Natural Systems of Pastoralism in the Developing World: Interdisciplinary Perspectives
11160877	7850936	TRUE	Keshavarz, M; Maleksaeidi, H; Karami, E, Livelihood vulnerability to drought: A case of rural Iran, INTERNATIONAL JOURNAL OF DISASTER RISK REDUCTION
11160878	7850937	TRUE	Martin, M; Billah, M; Siddiqui, T; Abrar, C; Black, R; Kniveton, D, Climate-related migration in rural Bangladesh: a behavioural model, POPULATION AND ENVIRONMENT
11160879	7850939	TRUE	Ingty, T, High mountain communities and climate change: adaptation, traditional ecological knowledge, and institutions, CLIMATIC CHANGE
11160880	7850940	TRUE	Negi, VS; Maikhuri, RK; Pharswan, D; Thakur, S; Dhyani, PP, Climate change impact in the Western Himalaya: people's perception and adaptive strategies, JOURNAL OF MOUNTAIN SCIENCE
11160881	7850942	TRUE	Puthucherril, T.G.; Evans, S.; Doelle, M., The role of the unfccc Regime in ensuring effective adaptation in developing countries: Lessons from Bangladesh, Clim. Law
11160882	7850943	TRUE	Alkaya, E; Bogurcu, M; Ulutas, F; Demirer, GN, Adaptation to Climate Change in Industry: Improving Resource Efficiency through Sustainable Production Applications, WATER ENVIRONMENT RESEARCH
11160916	7850948	TRUE	Barbi, F; Ferreira, LD, Governing Climate Change Risks: Subnational Climate Policies in Brazil, CHINESE POLITICAL SCIENCE REVIEW
11160917	7850952	TRUE	Sterle, K; Singletary, L, Adapting to Variable Water Supply in the Truckee-Carson River System, Western USA, WATER
11160920	7850961	TRUE	Boyer, MA; Meinzer, M; Bilich, A, The climate adaptation imperative: local choices targeting global problems?, LOCAL ENVIRONMENT
11160921	7850963	TRUE	Brklacich, M.; Woodrow, M., Agricultural adaptation to changing environments: Lessons learned from farmers in eastern Ontario, Canada,
11160922	7850971	TRUE	Jedd, T; Bathke, D; Gill, D; Paul, B; Wall, N; Bernadt, T; Petr, J; Mucia, A; Wall, M, Tracking Drought Perspectives: A Rural Case Study of Transformations Following an Invisible Hazard, WEATHER CLIMATE AND SOCIETY
11160923	7850972	TRUE	Koski, C; Siulagi, A, Environmental Harm or Natural Hazard? Problem Identification and Adaptation in US Municipal Climate Action Plans, REVIEW OF POLICY RESEARCH
11160924	7850974	TRUE	Rutty, M; Scott, D; Johnson, P; Jover, E; Pons, M; Steiger, R, The geography of skier adaptation to adverse conditions in the Ontario ski market, CANADIAN GEOGRAPHER-GEOGRAPHE CANADIEN
11160925	7850979	TRUE	Archer, L; Ford, JD; Pearce, T; Kowal, S; Gough, WA; Allurut, M, Longitudinal assessment of climate vulnerability: a case study from the Canadian Arctic, SUSTAINABILITY SCIENCE
11160976	7850983	TRUE	Hu, Q.; Tang, Z.; Shulski, M.; Umphlett, N.; Abdel-Monem, T.; Uhlarik, F.E., An examination of midwestern US cities' preparedness for climate change and extreme hazards, Nat. Hazards
11160977	7851006	TRUE	De Roeck, F; Orbie, J; Delputte, S, Mainstreaming climate change adaptation into the European Union's development assistance, ENVIRONMENTAL SCIENCE & POLICY
11160978	7851007	TRUE	Demiroglu, OC; Dannevig, H; Aall, C, Climate change acknowledgement and responses of summer (glacier) ski visitors in Norway, SCANDINAVIAN JOURNAL OF HOSPITALITY AND TOURISM
11160979	7851010	TRUE	Dinares, M; Sauri, D, Water consumption patterns of hotels and their response to droughts and public concerns regarding water conservation: The case of the Barcelona hotel industry during the 2007-2008 episode, DOCUMENTS D ANALISI GEOGRAFICA
11160980	7851011	TRUE	Risvoll, C.; Hovelsrud, G.K., Pasture access and adaptive capacity in reindeer herding districts in Nordland, Northern Norway, Polar J.
11160981	7851015	TRUE	Heltorp, KMA; Kangas, A; Hoen, HF, Do forest decision-makers in Southeastern Norway adapt forest management to climate change?, SCANDINAVIAN JOURNAL OF FOREST RESEARCH
11160982	7851019	TRUE	Rowan Gard, A.; Veitayaki, J., In the wake of winston Ã¢â‚¬â€œ climate change, mobility and resiliency in FIJI, Int. J. Safety Secur. Eng.
11160984	7851024	TRUE	Jupiter, S.; Mangubhai, S.; Kingsford, R.T., Conservation of biodiversity in the pacific islands of oceania: Challenges and opportunities, Pac. Conserv. Biol.
11160996	7851032	TRUE	Mees, HLP; Driessen, PPJ; Runhaar, HAC, Legitimate adaptive flood risk governance beyond the dikes: the cases of Hamburg, Helsinki and Rotterdam, REGIONAL ENVIRONMENTAL CHANGE
11160997	7851033	TRUE	Hooli, LJ, Resilience of the poorest: coping strategies and indigenous knowledge of living with the floods in Northern Namibia, REGIONAL ENVIRONMENTAL CHANGE
11160998	7851036	TRUE	Frija, A; Chebil, A; Speelman, S, FARMERS' ADAPTATION TO GROUNDWATER SHORTAGE IN THE DRY AREAS: IMPROVING APPROPRIATION OR ENHANCING ACCOMMODATION?, IRRIGATION AND DRAINAGE
11160999	7851037	TRUE	Da Cunha, DA; Coelho, AB; Feres, JG, Irrigation as an adaptive strategy to climate change: an economic perspective on Brazilian agriculture, ENVIRONMENT AND DEVELOPMENT ECONOMICS
11161000	7851039	TRUE	Hill, M, Adaptive Capacity of Water Governance: Cases From the Alps and the Andes, MOUNTAIN RESEARCH AND DEVELOPMENT
11161001	7851041	TRUE	Allaire, MC, Using practical and social information to influence flood adaptation behavior, WATER RESOURCES RESEARCH
11161002	7851042	TRUE	van Voorst, R; Hellman, J, One Risk Replaces Another Floods, Evictions and Policies on Jakarta's Riverbanks, ASIAN JOURNAL OF SOCIAL SCIENCE
11161003	7851043	TRUE	Figueiredo, P; Perkins, PE, Women and water management in times of climate change: participatory and inclusive processes, JOURNAL OF CLEANER PRODUCTION
11161004	7851045	TRUE	Murtinho, F; Eakin, H; Lopez-Carr, D; Hayes, TM, Does External Funding Help Adaptation? Evidence from Community-Based Water Management in the Colombian Andes, ENVIRONMENTAL MANAGEMENT
11161005	7851047	TRUE	Munji, CA; Bele, MY; Idinoba, ME; Sonwa, DJ, Floods and mangrove forests, friends or foes? Perceptions of relationships and risks in Cameroon coastal mangroves, ESTUARINE COASTAL AND SHELF SCIENCE
11161032	7851049	TRUE	Nyong, A.P.; Ngankam, T.M.; Felicite, T.L., Enhancement of resilience to climate variability and change through agroforestry practices in smallholder farming systems in Cameroon, Agrofor. Syst.
11161033	7851053	TRUE	Warner, BP; Schattman, RE; Hatch, CE, Farming the Floodplain: Ecological and Agricultural Tradeoffs and Opportunities in River and Stream Governance in New England's Changing Climate, CASE STUDIES IN THE ENVIRONMENT
11161034	7851057	TRUE	Makhado, R.A.; Saidi, A.T.; Tshikhudo, P.P., Optimising drought adaptation by small-scale farmers in southern Africa through integration of indigenous and technologically-driven practices,
11161036	7851061	TRUE	Sayre, M; Stenner, T; Argumedo, A, You Can't Grow Potatoes in the Sky: Building Resilience in the Face of Climate Change in the Potato Park of Cuzco, Peru, CULTURE AGRICULTURE FOOD AND ENVIRONMENT
11161037	7851062	TRUE	Uggla, Y; Lidskog, R, Climate risks and forest practices: forest owners' acceptance of advice concerning climate change, SCANDINAVIAN JOURNAL OF FOREST RESEARCH
11161038	7851065	TRUE	Davies, M; Bene, C; Arnall, A; Tanner, T; Newsham, A; Coirolo, C, Promoting Resilient Livelihoods through Adaptive Social Protection: Lessons from 124 programmes in South Asia, DEVELOPMENT POLICY REVIEW
11161039	7851066	TRUE	Burchfield, EK; Gilligan, J, Agricultural adaptation to drought in the Sri Lankan dry zone, APPLIED GEOGRAPHY
11161040	7851067	TRUE	Bonzanigo, L; Bojovic, D; Maziotis, A; Giupponi, C, Agricultural policy informed by farmers' adaptation experience to climate change in Veneto, Italy, REGIONAL ENVIRONMENTAL CHANGE
11161042	7851069	TRUE	Aziz, L; Sadok, W, Strategies used by the saffron producers of Taliouine (Morocco) to adapt to climate change, REVUE DE GEOGRAPHIE ALPINE-JOURNAL OF ALPINE RESEARCH
11161043	7851070	TRUE	Di Falco, S; Veronesi, M, How Can African Agriculture Adapt to Climate Change? A Counterfactual Analysis from Ethiopia, LAND ECONOMICS
11161045	7851073	TRUE	Knapp, T; Huang, QQ, Do climate factors matter for producers' irrigation practices decisions?, JOURNAL OF HYDROLOGY
11161046	7851074	TRUE	Koura, IB; Dossa, LH; Kassa, BD; Houinato, M, Adaptation of Periurban Cattle Production Systems to Environmental Changes: Feeding Strategies of Herdsmen in Southern Benin, AGROECOLOGY AND SUSTAINABLE FOOD SYSTEMS
11161047	7851075	TRUE	Schattman, RE; Roesch-McNally, G; Wiener, S; Niles, MT; Hollinger, DY, Farm service agency employee intentions to use weather and climate data in professional services, RENEWABLE AGRICULTURE AND FOOD SYSTEMS
11161048	7851076	TRUE	Sen, LTH; Bond, J, Agricultural adaptation to flood in lowland rice production areas of Central Vietnam: understanding the 'regenerated rice' ratoon system, CLIMATE AND DEVELOPMENT
11161049	7851080	TRUE	Zhang, B; Fu, ZT; Wang, JQ; Zhang, LX, Farmers' adoption of water-saving irrigation technology alleviates water scarcity in metropolis suburbs: A case study of Beijing, China, AGRICULTURAL WATER MANAGEMENT
11161051	7851083	TRUE	Abidoye, BO; Kurukulasuriya, P; Mendelsohn, R, SOUTH-EAST ASIAN FARMER PERCEPTIONS OF CLIMATE CHANGE, CLIMATE CHANGE ECONOMICS
11161072	7851084	TRUE	Iqbal, MW; Donjadee, S; Kwanyuen, B; Liu, SY, Farmers' perceptions of and adaptations to drought in Herat Province, Afghanistan, JOURNAL OF MOUNTAIN SCIENCE
11161073	7851085	TRUE	Kakumanu, KR; Kaluvai, YR; Nagothu, US; Lati, NR; Kotapati, GR; Karanam, S, BUILDING FARM-LEVEL CAPACITIES IN IRRIGATION WATER MANAGEMENT TO ADAPT TO CLIMATE CHANGE, IRRIGATION AND DRAINAGE
11161074	7851088	TRUE	Sweet, SK; Wolfe, DW; DeGaetano, A; Benner, R, Anatomy of the 2016 drought in the Northeastern United States: Implications for agriculture and water resources in humid climates, AGRICULTURAL AND FOREST METEOROLOGY
11161075	7851090	TRUE	Mapfumo, P; Onyango, M; Honkponou, SK; El Mzouri, E; Githeko, A; Rabeharisoa, L; Obando, J; Omolo, N; Majule, A; Denton, F; Ayers, J; Agrawal, A, Pathways to transformational change in the face of climate impacts: an analytical framework, CLIMATE AND DEVELOPMENT
11161076	7851091	TRUE	Sibelet, N.; Posada, K.E.; Gutirrez-Montes, I.A., Agroforestry systems provide firewood for livelihood improvement in Guatemala,
11161077	7851092	TRUE	Uddin, M.N.; Bokelmann, W.; Entsminger, J.S., Factors affecting farmers' adaptation strategies to environmental degradation and climate change effects: A farm level study in bangladesh, Clim.
11161079	7851098	TRUE	Khanal, AR; Mishra, AK, Enhancing food security: Food crop portfolio choice in response to climatic risk in India, GLOBAL FOOD SECURITY-AGRICULTURE POLICY ECONOMICS AND ENVIRONMENT
11161080	7851099	TRUE	Yaro, JA, The perception of and adaptation to climate variability/change in Ghana by small-scale and commercial farmers, REGIONAL ENVIRONMENTAL CHANGE
11161081	7851102	TRUE	Oo, AT; Van Huylenbroeck, G; Speelman, S, Assessment of climate change vulnerability of farm households in Pyapon District, a delta region in Myanmar, INTERNATIONAL JOURNAL OF DISASTER RISK REDUCTION
11161092	7851103	TRUE	Skarbo, K; VanderMolen, K, Maize migration: key crop expands to higher altitudes under climate change in the Andes, CLIMATE AND DEVELOPMENT
11161094	7851105	TRUE	Li, XL; Ding, Y; Yin, YT; Yang, TT; Liu, ZY; Ren, WB; Zhang, JL; Sarula; Li, YH; Hou, XY, Patterns of herders' adaptation to changes in social-ecological systems across northern China's grasslands over the past three decades, RANGELAND JOURNAL
11161096	7851109	TRUE	Frisvold, G; Bai, T, Irrigation Technology Choice as Adaptation to Climate Change in the Western United States, JOURNAL OF CONTEMPORARY WATER RESEARCH & EDUCATION
11161097	7851112	TRUE	Doughty, CA, Building climate change resilience through local cooperation: a Peruvian Andes case study, Regional Environmental Change
11161098	7851115	TRUE	Malenab, MCT; Visco, ES; Amparo, JMS; Torio, DA; Atole, MRJT; Mendoza, MD, Integrated Adaptation Management Approach toward Sustained Fish Production by Fish Farmers of Marilao-Meycauayan-Obando River System, ASIAN JOURNAL OF AGRICULTURE AND DEVELOPMENT
11161099	7851117	TRUE	Nguyen, MT; Renaud, FG; Sebesvari, Z, Drivers of change and adaptation pathways of agricultural systems facing increased salinity intrusion in coastal areas of the Mekong and Red River deltas in Vietnam, ENVIRONMENTAL SCIENCE & POLICY
11161100	7851118	TRUE	Jacobi, J, Agroforestry in Bolivia: opportunities and challenges in the context of food security and food sovereignty, ENVIRONMENTAL CONSERVATION
11161101	7851127	TRUE	Rankoana, SA, Rainfall scarcity and its impacts on subsistence farming: the role of gender and religious rituals in adaptation to change, AGENDA-EMPOWERING WOMEN FOR GENDER EQUITY
11161102	7851128	TRUE	Rohila, A.K.; Ghanghas, B.S.; Shehrawat, P.S., Adoption status of direct seeded rice cultivation technology in Haryana,
11161103	7851132	TRUE	Karapinar, B.; Ãƒâ€“zertan, G., Yield implications of date and cultivar adaptation to wheat phenological shifts: a survey of farmers in Turkey,
11161105	7851134	TRUE	Fulton, S; Lopez-Sagastegui, C; Weaver, AH; Fitzmaurice-Cahluni, F; Galindo, C; Melo, FFR; Yee, S; Ojeda-Villegas, MB; Fuentes, DA; Torres-Bahena, E, Untapped Potential of Citizen Science in Mexican Small-Scale Fisheries, FRONTIERS IN MARINE SCIENCE
11161107	7851139	TRUE	Elagib, NA; Musa, AA; Sulieman, HM, Socio-hydrological Framework of Farmer-Drought Feedback: Darfur as a Case Study, WATER RESOURCES IN ARID AREAS: THE WAY FORWARD
11161108	7851141	TRUE	Wuepper, D.; Zilberman, D.; Sauer, J., Non-cognitive skills and climate change adaptation: empirical evidence from Ghana's pineapple farmers,
11161110	7851142	TRUE	Pani, A.; Mishra, P., Hapa irrigation for promoting sustainable agricultural intensification: experience from Bankura district of India,
11161112	7851149	TRUE	Fischer, H.W.; Reddy, N.L.N.; Rao, M.L.S., Can more drought resistant crops promote more climate secure agriculture? Prospects and challenges of millet cultivation in Ananthapur, Andhra Pradesh, World Develop. Perspect.
11161118	7851151	TRUE	Pearce, T; Ford, J; Willox, AC; Smit, B, Inuit Traditional Ecological Knowledge (TEK), Subsistence Hunting and Adaptation to Climate Change in the Canadian Arctic, ARCTIC
11161121	7851153	TRUE	Hockett, M; Richardson, RB, EXAMINING THE DRIVERS OF AGRICULTURAL EXPERIMENTATION AMONG SMALLHOLDER FARMERS IN MALAWI, EXPERIMENTAL AGRICULTURE
11161138	7851155	TRUE	Kabir, MJ; Alauddin, M; Crimp, S, Farm-level adaptation to climate change in Western Bangladesh: An analysis of adaptation dynamics, profitability and risks, LAND USE POLICY
11161139	7851156	TRUE	Elum, ZA; Modise, DM; Marr, A, Farmer's perception of climate change and responsive strategies in three selected provinces of South Africa, CLIMATE RISK MANAGEMENT
11161140	7851157	TRUE	Wu, N; Ismail, M; Joshi, S; Yi, SL; Shrestha, RM; Jasra, AW, Livelihood diversification as an adaptation approach to change in the pastoral Hindu-Kush Himalayan region, JOURNAL OF MOUNTAIN SCIENCE
11161141	7851158	TRUE	Dossou-Aminon, I; Dansi, A; Ahissou, H; Cisse, N; Vodouhe, R; Sanni, A, Climate variability and status of the production and diversity of sorghum (Sorghum bicolor (L.) Moench) in the arid zone of northwest Benin, GENETIC RESOURCES AND CROP EVOLUTION
11161142	7851161	TRUE	Teller, Amy S, Moving the Conversation on Climate Change and Inequality to the Local: Socio-ecological Vulnerability in Agricultural Tanzania., Sociology of development (Oakland, Calif.)
11161143	7851163	TRUE	Zizinga, A; Kangalawe, RYM; Ainslie, A; Tenywa, MM; Majaliwa, J; Saronga, NJ; Amoako, EE, Analysis of Farmer's Choices for Climate Change Adaptation Practices in South-Western Uganda, 1980-2009, CLIMATE
11161144	7851165	TRUE	Bastakoti, RC; Bharati, L; Bhattarai, U; Wahid, SM, Agriculture under changing climate conditions and adaptation options in the Koshi Basin, CLIMATE AND DEVELOPMENT
11161145	7851166	TRUE	Akinrotimi, O.A.; Edun, O.M., Impact of climate change on brackish water aquaculture development in the coastal areas of Niger Delta, Int. J. Agric. Res.
11161147	7851173	TRUE	Hendel, M.; Colombert, M.; Diab, Y.; Royon, L., Improving a pavement-watering method on the basis of pavement surface temperature measurements, Urban Clim.
11161158	7851174	TRUE	Tan, Y; Liu, XC; Hugo, G, Exploring relationship between social inequality and adaptations to climate change: evidence from urban household surveys in the Yangtze River delta, China, POPULATION AND ENVIRONMENT
11161159	7851176	TRUE	Wamsler, C, From Risk Governance to City-Citizen Collaboration: Capitalizing on individual adaptation to climate change, ENVIRONMENTAL POLICY AND GOVERNANCE
11161162	7851183	TRUE	Barrett, S, Local level climate justice? Adaptation finance and vulnerability reduction, GLOBAL ENVIRONMENTAL CHANGE-HUMAN AND POLICY DIMENSIONS
11161163	7851184	TRUE	Maleksaeidi, H; Karami, E; Zamani, GH; Rezaei-Moghaddam, K; Hayati, D; Masoudi, M, Discovering and characterizing farm households' resilience under water scarcity, ENVIRONMENT DEVELOPMENT AND SUSTAINABILITY
11161164	7851185	TRUE	Rao, N.; Singh, C.; Solomon, D.; Camfield, L.; Sidiki, R.; Angula, M.; Poonacha, P.; Sidib, A.; Lawson, E.T., Managing risk, changing aspirations and household dynamics: Implications for wellbeing and adaptation in semi-arid Africa and India,
11161165	7851189	TRUE	Schwan, S; Yu, XH, Social protection as a strategy to address climate-induced migration, INTERNATIONAL JOURNAL OF CLIMATE CHANGE STRATEGIES AND MANAGEMENT
11161166	7851190	TRUE	Jacobson, C; Crevello, S; Chea, C; Jarihani, B, When is migration a maladaptive response to climate change?, REGIONAL ENVIRONMENTAL CHANGE
11161167	7851191	TRUE	Rahman, MK; Paul, BK; Curtis, A; Schmidlin, TW, Linking Coastal Disasters and Migration: A Case Study of Kutubdia Island, Bangladesh, PROFESSIONAL GEOGRAPHER
11161214	7851192	TRUE	Leap, B.; Thompson, D., Social solidarity, collective identity, resilient communities: Two case studies from the rural U.S. and Uruguay,
11161216	7851194	TRUE	Chen, S.; Davis, K., Climate-adaptive community water management for food security: Experiences from the UNDP community water initiative, Future of Food: J. Food, Agriculture Soc.
11161217	7851197	TRUE	King, D; Bird, D; Haynes, K; Boon, H; Cottrell, A; Millar, J; Okada, T; Box, P; Keogh, D; Thomas, M, Voluntary relocation as an adaptation strategy to extreme weather events, INTERNATIONAL JOURNAL OF DISASTER RISK REDUCTION
11161218	7851200	TRUE	Lundgren-Kownacki, K; Kjellberg, SM; Gooch, P; Dabaieh, M; Anandh, L; Venugopal, V, Climate change-induced heat risks for migrant populations working at brick kilns in India: a transdisciplinary approach, INTERNATIONAL JOURNAL OF BIOMETEOROLOGY
11161219	7851202	TRUE	Ban, J; Shi, WY; Cui, LL; Liu, X; Jiang, C; Han, LY; Wang, R; Li, TT, Health-risk perception and its mediating effect on protective behavioral adaptation to heat waves, ENVIRONMENTAL RESEARCH
11161220	7851205	TRUE	Budhathoki, NK; Zander, KK, Socio-Economic Impact of and Adaptation to Extreme Heat and Cold of Farmers in the Food Bowl of Nepal, INTERNATIONAL JOURNAL OF ENVIRONMENTAL RESEARCH AND PUBLIC HEALTH
11161221	7851206	TRUE	Lesnikowski, A; Ford, J; Biesbroek, R; Berrang-Ford, L; Heymann, SJ, National-level progress on adaptation, NATURE CLIMATE CHANGE
11161222	7851207	TRUE	Chiang, YC, Exploring community risk perceptions of climate change - A case study of a flood-prone urban area of Taiwan, CITIES
11161223	7851210	TRUE	Austin, SE; Ford, JD; Berrang-Ford, L; Biesbroek, R; Tosun, J; Ross, NA, Intergovernmental relations for public health adaptation to climate change in the federalist states of Canada and Germany, GLOBAL ENVIRONMENTAL CHANGE-HUMAN AND POLICY DIMENSIONS
11161224	7851212	TRUE	Nunfam, VF; Van Etten, EJ; Oosthuizen, J; Adusei-Asante, K; Frimpong, K, Climate change and occupational heat stress risks and adaptation strategies of mining workers: Perspectives of supervisors and other stakeholders in Ghana, ENVIRONMENTAL RESEARCH
11161225	7851214	TRUE	Kabir, ME; Serrao-Neumann, S; Davey, P; Hossain, M; Alam, MT, Drivers and temporality of internal migration in the context of slow-onset natural hazards: Insights from north-west rural Bangladesh, INTERNATIONAL JOURNAL OF DISASTER RISK REDUCTION
11161226	7963637	TRUE	Valois, P; Talbot, D; Caron, M; Carrier, MP; Morin, AJS; Renaud, JS; Jacob, J; Gosselin, P, Development and Validation of a Behavioural Index for Adaptation to High Summer Temperatures among Urban Dwellers, INTERNATIONAL JOURNAL OF ENVIRONMENTAL RESEARCH AND PUBLIC HEALTH
11161227	7963639	TRUE	Rittenhouse, CD; Rissman, AR, Changes in winter conditions impact forest management in north temperate forests, JOURNAL OF ENVIRONMENTAL MANAGEMENT
11161228	7963640	TRUE	Aguilera, SE; Broad, K; Pomeroy, C, Adaptive Capacity of the Monterey Bay Wetfish Fisheries: Proactive Responses to the 2015-16 El Nino Event, SOCIETY & NATURAL RESOURCES
11161229	7963643	TRUE	Oakes, LE; Ardoin, NM; Lambin, EF, "I know, therefore I adapt?" Complexities of individual adaptation to climate-induced forest dieback in Alaska, ECOLOGY AND SOCIETY
11161230	7963644	TRUE	Sandink, D, Urban flooding and ground-related homes in Canada: an overview, JOURNAL OF FLOOD RISK MANAGEMENT
11161231	7963647	TRUE	Valois, P; Caron, M; Gousse-Lessard, AS; Talbot, D; Renaud, JS, Development and validation of five behavioral indices of flood adaptation, BMC PUBLIC HEALTH
11161232	7963649	TRUE	Kistner, E; Kellner, O; Andresen, J; Todey, D; Morton, LW, Vulnerability of specialty crops to short-term climatic variability and adaptation strategies in the Midwestern USA, CLIMATIC CHANGE
11161233	7963651	TRUE	Halofsky, JE; Peterson, DL; Metlen, KL; Myer, MG; Sample, VA, Developing and Implementing Climate Change Adaptation Options in Forest Ecosystems: A Case Study in Southwestern Oregon, USA, FORESTS
11161235	7963654	TRUE	Lane, K; Wheeler, K; Charles-Guzman, K; Ahmed, M; Blum, M; Gregory, K; Graber, N; Clark, N; Matte, T, Extreme Heat Awareness and Protective Behaviors in New York City, JOURNAL OF URBAN HEALTH-BULLETIN OF THE NEW YORK ACADEMY OF MEDICINE
11161236	7964638	TRUE	Valente, S.; Veloso-Gomes, F., Coastal climate adaptation in port-cities: adaptation deficits, barriers, and challenges ahead,
11161237	7964639	TRUE	Craig, RK, Coastal adaptation, government-subsidized insurance, and perverse incentives to stay, CLIMATIC CHANGE
11161238	8520113	TRUE	Daoudi, A.; Terranti, S.; Hammouda, R.F.; Bdrani, S., Adaptation to drought in the algerian steppe: The case of productive strategies of hadj mechri agro-pastoralisst , Cahiers Agricultures
11161239	8520114	TRUE	Qi, X.H.; Yang, Y.; Jin, X.X.; Liu, G.Q.; Da Li, M.; Pan, D.L.; Qi, X., Rural household perceptions and adaptations to climate change based on an investigation and comparison of two middle and eastern villages in China, Shengtai Xuebao/ Acta Ecologica Sinica
11161240	8520117	TRUE	Yegbemey, R.N.; Yabi, J.A.; AÃƒÂ¯hounton, G.B.; ParaÃƒÂ¯so, A., Simultaneous modelling of the perception of and adaptation to climate change: The case of the maize producers in northern Benin , Cahiers Agricultures
11161241	8520155	TRUE	Schembergue, A.; da Cunha, D.A.; de Matos Carlos, S.; Pires, M.V.; Faria, R.M., Sistemas agroflorestais como estrategia de adaptaÃƒÂ§ÃƒÂ£o aos desafios das mudanÃƒÂ§as climÃƒÂ¡ticas no Brasil, Revista de Economia e Sociologia Rural
11161244	8535750	TRUE	Bhattarai, B.; Beilin, R.; Ford, R., Gender, Agrobiodiversity, and Climate Change: A Study of Adaptation Practices in the Nepal Himalayas, World Development
11161246	8535752	TRUE	Chaijaroen, P., Long-lasting income shocks and adaptations: Evidence from coral bleaching in Indonesia, Journal of Development Economics
11161247	8535781	TRUE	Poudel, D.D., Factors associated with farm-level variation, and farmers' perception and climate change adaptation in smallholder mixed-farming livestock production system in Nepal, International Journal of Environment and Sustainable Development
11161248	8535786	TRUE	Asfaw, A.; Simane, B.; Bantider, A.; Hassen, A., Determinants in the adoption of climate change adaptation strategies: evidence from rainfed-dependent smallholder farmers in north-central Ethiopia (Woleka sub-basin), Environment, Development and Sustainability
11161249	8535788	TRUE	Khan, M.I.; Kundu, G.K.; Akter, M.S.; Mallick, B.; Islam, M.M., Climatic impacts and responses of migratory and non-migratory fishers of the Padma River, Bangladesh, Social Sciences

## Sheet: Excluded articles
SysRev ID	GAMI ID	Include	Citation	Exclusion reason
11159638	6715369	FALSE	Tesfamariam, Y; Hurlbert, M, Gendered adaptation of Eritrean dryland farmers, INTERNATIONAL JOURNAL OF CLIMATE CHANGE STRATEGIES AND MANAGEMENT	Duplicate
11159640	6714151	FALSE	Thaler, T; Seebauer, S, Bottom-up citizen initiatives in natural hazard management: Why they appear and what they can do?, ENVIRONMENTAL SCIENCE & POLICY	Insufficient information about response
11159642	6715370	FALSE	van Valkengoed, AM; Steg, L, Meta-analyses of factors motivating climate change adaptation behaviour, NATURE CLIMATE CHANGE	Insufficient information about response
11159662	6715380	FALSE	Hasan, H; Smith, S; Finnegan, P, An activity theoretic analysis of the mediating role of information systems in tackling climate change adaptation, INFORMATION SYSTEMS JOURNAL	Insufficient information about response
11159671	6714714	FALSE	Sanfo, S; Fonta, MW; Boubacar, I; Lamers, PAJ, Survey data on key climate and environmental drivers of farmers' migration in Burkina Faso, West Africa, DATA IN BRIEF	Insufficient information about response
11159691	6205496	FALSE	Bouma, JA; Hegde, SS; Lasage, R, Assessing the returns to water harvesting: A meta-analysis, AGRICULTURAL WATER MANAGEMENT	Non-primary/empirical research
11159694	6205500	FALSE	Gardner, CJ; Gabriel, FUL; St John, FAV; Davies, ZG, Changing livelihoods and protected area management: a case study of charcoal production in south-west Madagascar, ORYX	Unsupported publication type
11159705	6714184	FALSE	Berry, PM; Brown, S; Chen, MP; Kontogianni, A; Rowlands, O; Simpson, G; Skourtos, M, Cross-sectoral interactions of adaptation and mitigation measures, CLIMATIC CHANGE	Non-primary/empirical research
11159707	6715402	FALSE	Walshe, RA; Seng, DC; Bumpus, A; Auffray, J, Perceptions of adaptation, resilience and climate knowledge in the Pacific: The cases of Samoa, Fiji and Vanuatu, INTERNATIONAL JOURNAL OF CLIMATE CHANGE STRATEGIES AND MANAGEMENT	Insufficient information about response
11159710	6715406	FALSE	Batbaatar, A; Apichayakul, P; Tantanee, S, Stakeholders' perspectives towards effective climate change adaptation on the Mongolian livestock sector, INTERNATIONAL CONFERENCE ON CLIMATE CHANGE: CHALLENGES AND OPPORTUNITY ON ENVIRONMENT DEGRADATION RESEARCHES	Insufficient information about response
11159728	6205504	FALSE	Arslan, A; McCarthy, N; Lipper, L; Asfaw, S; Cattaneo, A; Kokwe, M, Climate Smart Agriculture? Assessing the Adaptation Implications in Zambia, JOURNAL OF AGRICULTURAL ECONOMICS	Non-primary/empirical research
11159734	6205511	FALSE	Da Costa, K.; Pospieszna, P., Finding the missing thread: The inclusion of a human rights-based approach in tackling climate change mitigation, adaptation and disaster risk reduction, Proc. Int. Disaster Risk Conf.: Integr. Risk Manag. - Role Sci., Technol. Pract., IDRC Davos	Non-primary/empirical research
11159737	6715417	FALSE	Tan, Y; Liu, XC, Water shortage and inequality in arid Minqin oasis of northwest China: adaptive policies and farmers' perceptions, LOCAL ENVIRONMENT	Insufficient information about response
11159738	6715418	FALSE	Gebru, A.A.; Araya, A.; Habtu, S.; Wolde-Georgis, T.; Teka, D.; Martorano, L.G., Evaluating water productivity of tomato, pepper and Swiss chard under clay pot and furrow irrigation technologies in semi-arid areas of northern Ethiopia,	Non-primary/empirical research
11159742	6715424	FALSE	Martinsen, G; Liu, SX; Mo, XG; Bauer-Gottwein, P, Joint optimization of water allocation and water quality management in Haihe River basin, SCIENCE OF THE TOTAL ENVIRONMENT	Insufficient information on actors/roles
11159747	6714738	FALSE	Li, S; Wang, Q; Chun, JA, Impact assessment of climate change on rice productivity in the Indochinese Peninsula using a regional-scale crop model, INTERNATIONAL JOURNAL OF CLIMATOLOGY	Insufficient information about response
11159753	6714747	FALSE	Duncan, JMA; Dash, J; Tompkins, EL, Observing adaptive capacity in Indian rice production systems, AIMS AGRICULTURE AND FOOD	Insufficient information about response
11159798	6205531	FALSE	Reyers, B; Nel, JL; O'Farrell, PJ; Sitas, N; Nel, DC, Navigating complexity through knowledge coproduction: Mainstreaming ecosystem services into disaster risk reduction, PROCEEDINGS OF THE NATIONAL ACADEMY OF SCIENCES OF THE UNITED STATES OF AMERICA	Insufficient information about response
11159801	6205534	FALSE	McNamara, KE, Raising awareness about climate change in Pacific communities, ENVIRONMENTAL EDUCATION RESEARCH	Insufficient information on actors/roles
11159802	6205535	FALSE	Wilkes, A; Barnes, AP; Batkhishig, B; Clare, A; Namkhainyam, B; Tserenbandi; Chuluunbaatar, N; Namkhainyam, T, Is cross-breeding with indigenous sheep breeds an option for climate-smart agriculture?, SMALL RUMINANT RESEARCH	Non-primary/empirical research
11159804	6205537	FALSE	Benomar, L; Lamhamedi, MS; Rainville, A; Beaulieu, J; Bousquet, J; Margolis, HA, Genetic Adaptation vs. Ecophysiological Plasticity of Photosynthetic-Related Traits in Young Picea glauca Trees along a Regional Climatic Gradient, FRONTIERS IN PLANT SCIENCE	Insufficient information about response
11159805	6205538	FALSE	Rurinda, J; Mapfumo, P; van Wijk, MT; Mtambanengwe, F; Rufino, MC; Chikowo, R; Giller, KE, Managing soil fertility to adapt to rainfall variability in smallholder cropping systems in Zimbabwe, FIELD CROPS RESEARCH	Insufficient information about response
11159826	6714205	FALSE	Morote, AF; Olcina, J; Hernandez, M, The Use of Non-Conventional Water Resources as a Means of Adaptation to Drought and Climate Change in Semi-Arid Regions: South-Eastern Spain, WATER	Insufficient information on actors/roles
11159880	6714226	FALSE	Hasan, MK; Kumar, L, Comparison between meteorological data and farmer perceptions of climate change and vulnerability in relation to adaptation, JOURNAL OF ENVIRONMENTAL MANAGEMENT	Insufficient information about response
11159902	6214219	FALSE	Wossen, T; Berger, T; Haile, MG; Troost, C, Impacts of climate variability and food price volatility on household income and food security of farm households in East and West Africa, AGRICULTURAL SYSTEMS	Non-primary/empirical research
11159923	6714831	FALSE	Haworth, BT; Biggs, E; Duncan, J; Wales, N; Boruff, B; Bruce, E, Geographic Information and Communication Technologies for Supporting Smallholder Agriculture and Climate Resilience, CLIMATE	Insufficient information on actors/roles
11159924	6714832	FALSE	Masseroni, D; Facchi, A; Depoli, EV; Renga, FM; Gandolfi, C, IRRIG-OH: AN OPEN-HARDWARE DEVICE FOR SOIL WATER POTENTIAL MONITORING AND IRRIGATION MANAGEMENT, IRRIGATION AND DRAINAGE	Insufficient information about response
11159928	6714251	FALSE	Eggers, M; Kayser, M; Isselstein, J, Grassland farmers' attitudes toward climate change in the North German Plain, REGIONAL ENVIRONMENTAL CHANGE	Insufficient information about response
11159955	6714851	FALSE	Kimaro, J.; Liseki, S.; Mareale, W.; Mrisha, C., Enhancing rural food security through improved beekeeping in Northern Tanzania, Livest. Res. Rural Dev.	Insufficient information about response
11159957	6714263	FALSE	Khanal, U; Wilson, C; Lee, B; Hoang, VN, Do climate change adaptation practices improve technical efficiency of smallholder farmers? Evidence from Nepal, CLIMATIC CHANGE	Unsupported publication type
11159959	6714267	FALSE	Varela-Ortega, C; Blanco-Gutierrez, I; Esteve, P; Bharwani, S; Fronzek, S; Downing, TE, How can irrigated agriculture adapt to climate change? Insights from the Guadiana Basin in Spain, REGIONAL ENVIRONMENTAL CHANGE	Insufficient information about response
11159998	6214236	FALSE	Nakabugo, R.; Mukwaya, I.P.; Geoffrey, S., Adoption of Climate Smart Agricultural Technologies and Practices in Drylands in Uganda: Evidence from aÃ‚Â Microlevel Study in Nakasongola District,	Unsupported publication type
11160003	6214241	FALSE	Azibo, BR; Kimengsi, JN, Building an indigenous agro-pastoral adaptation framework to climate change in Sub-Saharan Africa: experiences from the North West Region of Cameroon, AGRICULTURE AND CLIMATE CHANGE - ADAPTING CROPS TO INCREASED UNCERTAINTY (AGRI 2015)	Fulltext unavailable
11160017	6714884	FALSE	Stojanov, R; Duzi, B; Vikhrov, D; Kelman, I, CLIMATE EXTREMES IMPACTS AND MIGRATION AS ADAPTATION IN BANGLADESH: THE LOCAL EXPERTS' KNOWLEDGE AND PERCEPTION, INTERNATIONAL RELATIONS 2013: CONTEMPORARY ISSUES OF WORLD ECONOMICS AND POLITICS, VOLS 1-4	Unsupported publication type
11160046	6714905	FALSE	Slovic, AD; de Oliveira, MA; Biehl, J; Ribeiro, H, How Can Urban Policies Improve Air Quality and Help Mitigate Global Climate Change: a Systematic Mapping Review, JOURNAL OF URBAN HEALTH-BULLETIN OF THE NEW YORK ACADEMY OF MEDICINE	Non-primary/empirical research
11160071	6714922	FALSE	Rosol, R; Powell-Hellyer, S; Chan, HM, Impacts of decline harvest of country food on nutrient intake among Inuit in Arctic Canada: impact of climate change and possible adaptation plan, INTERNATIONAL JOURNAL OF CIRCUMPOLAR HEALTH	Insufficient information about response
11160095	6214256	FALSE	Elrick-Barr, CE; Thomsen, DC; Preston, BL; Smith, TF, Perceptions matter: household adaptive capacity and capability in two Australian coastal communities, REGIONAL ENVIRONMENTAL CHANGE	Insufficient information about response
11160110	6941037	FALSE	Maiti, S; Jha, SK; Garai, S; Nag, A; Chakravarty, R; Kadian, KS; Chandel, BS; Datta, KK; Upadhyay, RC, Adaptation strategies followed by the livestock rearers of Coastal Odisha and West Bengal to cope up with climate change, INDIAN JOURNAL OF ANIMAL SCIENCES	Insufficient information about response
11160112	6941044	FALSE	Sarkar, S; Padaria, RN; Vijayragavan, K; Pathak, H; Kumar, P; Jha, GK, Assessing the Potential of Indigenous Technological Knowledge (ITK) for Adaptation to Climate Change in the Himalayan and Arid ecosystems, INDIAN JOURNAL OF TRADITIONAL KNOWLEDGE	Insufficient information about response
11160113	6941045	FALSE	Narayanan, K; Sahu, SK, Effects of climate change on household economy and adaptive responses among agricultural households in eastern coast of India, CURRENT SCIENCE	Insufficient information on actors/roles
11160122	6714325	FALSE	Muriithi, G.M.; Mutuma, E.; Kinyua, J.M.; Kaptalai, A.S.; Kipronoh, K.A., Assessment of vulnerability levels and coping strategies of pastoral communities to climate variability and change: A case study of the West Pokot, Kenya, Livest. Res. Rural Dev.	Insufficient information about response
11160135	6714953	FALSE	Wodon, Q; Burger, N; Grant, A; Liverani, A, Climate Change, Migration, and Adaptation in the MENA Region, CLIMATE CHANGE AND MIGRATION: EVIDENCE FROM THE MIDDLE EAST AND NORTH AFRICA	Unsupported publication type
11160144	6216012	FALSE	Sarmiento-Soler, A; Vaast, P; Hoffmann, MP; Rotter, RP; Jassogne, L; van Asten, PJA; Graefe, S, Water use of Coffea arabica in open versus shaded systems under smallholder's farm conditions in Eastern Uganda, AGRICULTURAL AND FOREST METEOROLOGY	Insufficient information about response
11160160	6714959	FALSE	Reckien, D; Petkova, EP, Who is responsible for climate change adaptation?, ENVIRONMENTAL RESEARCH LETTERS	Insufficient information about response
11160161	6714960	FALSE	Moatty, A; Vinet, F; Defossez, S; Cherel, JP; Grelot, F, Integrating a "preventive ethic" in the post-disaster recovery process: resilience, adaptations and "preventive reconstruction", HOUILLE BLANCHE-REVUE INTERNATIONALE DE L EAU	Unsupported publication type
11160174	6941052	FALSE	Lu, QC; Zhang, JY; Rahman, ABMS, The interrelationship between travel behavior and life choices in adapting to flood disasters, NATURAL HAZARDS	Non-primary/empirical research
11160198	6714976	FALSE	Carabine, EA; Wainwright, J; Twyman, C, Narratives of a Drought: Exploring Resilience in Kenya's Drylands, ADVANCES IN SOCIAL SIMULATION	Insufficient information about response
11160200	6714978	FALSE	Sietz, D; Van Dijk, H, Land-based adaptation to global change: What drives soil and water conservation in western Africa?, GLOBAL ENVIRONMENTAL CHANGE-HUMAN AND POLICY DIMENSIONS	Non-primary/empirical research
11160206	6216036	FALSE	Goldbach, C, Out-migration from Coastal Areas in Ghana and Indonesia-the Role of Environmental Factors, CESIFO ECONOMIC STUDIES	Insufficient information about response
11160207	6216038	FALSE	Kahime, K.; Bounoua, L.; Messouli, M.; Boussaa, S.; Boumezzough, A., Eco-adaptation strategies of health to climate change: Case of zoonotic cutaneous leishmaniasis (ZCL) as vulnerability indicatorin Pre-Saharan region of Morocco, Environmental Change and Hum. Security in Africa and the Middle East	Insufficient information on actors/roles
11160210	6216041	FALSE	Grimberg, BI; Ahmed, S; Ellis, C; Miller, Z; Menalled, F, Climate Change Perceptions and Observations of Agricultural Stakeholders in the Northern Great Plains, SUSTAINABILITY	Insufficient information about response
11160219	6941094	FALSE	Reinau, D; Achermann, C; Arnet, N; Meier, C R; Hatz, C; Surber, C, Sun protective behaviour of vacationers spending holidays in the tropics and subtropics.,	Insufficient information about response
11160221	6941098	FALSE	Spyridi, D; Vlachokostas, C; Michailidou, AV; Sioutas, C; Moussiopoulos, N, Strategic planning for climate change mitigation and adaptation: the case of Greece, INTERNATIONAL JOURNAL OF CLIMATE CHANGE STRATEGIES AND MANAGEMENT	Insufficient information about response
11160225	6941111	FALSE	Raftoyannis, Y.; Nocentini, S.; Marchi, E.; Sainz, R.C.; Guemes, C.G.; Pilas, I.; Peric, S.; Paulo, J.A.; Moreira-Marcelino, A.C.; Costa-Ferreira, M.; Kakouris, E.; Lindner, M., Perceptions of forest experts on climate change and fire management in European Mediterranean forests, IForest	Insufficient information on actors/roles
11160232	6216055	FALSE	Hailegiorgis, A; Crooks, A; Cioffi-Revilla, C, An Agent-Based Model of Rural Households' Adaptation to Climate Change, JASSS-THE JOURNAL OF ARTIFICIAL SOCIETIES AND SOCIAL SIMULATION	Non-primary/empirical research
11160272	6216066	FALSE	Yoshimura, M.; Yamashita, M., Understanding regional effects on climate change and multidisciplinary approarch for coping strategies - Case study at rural village in Sub-Saharan Africa, Int. Arch. Photogramm., Remote Sens. Spat. Inf. Sci. - ISPRS Arch.	Unsupported publication type
11160286	6941133	FALSE	Chung, A; Oliver, T; Gove, J; Gorospe, K; White, D; Davidson, K; Walsh, W, Translating resilience-based management theory to practice for coral bleaching recovery in Hawai'i, MARINE POLICY	Non-primary/empirical research
11160313	6715008	FALSE	Rasul, G.; Pasakhala, B.; Mishra, A.; Pant, S., Adaptation to mountain cryosphere change: issues and challenges,	Non-primary/empirical research
11160320	6714392	FALSE	Ahmad, M.; Mustafa, G.; Iqbal, M., Impact of farm households' adaptations to climate change on food security: Evidence from different agro-ecologies of Pakistan, Pak. Dev. Rev.	Unsupported publication type
11160326	6941147	FALSE	MacIntyre, E; Khanna, S; Darychuk, A; Copes, R; Schwartz, B, Evaluating risk communication during extreme weather and climate change: a scoping review, HEALTH PROMOTION AND CHRONIC DISEASE PREVENTION IN CANADA-RESEARCH POLICY AND PRACTICE	Non-primary/empirical research
11160333	6216084	FALSE	Abdulai, I; Vaast, P; Hoffmann, MP; Asare, R; Jassogne, L; Van Asten, P; Rotter, RP; Graefe, S, Cocoa agroforestry is less resilient to sub-optimal and extreme climate than cocoa in full sun, GLOBAL CHANGE BIOLOGY	Insufficient information about response
11160334	6941154	FALSE	Santos, A; Godinho, DP; Vizinho, A; Alves, F; Pinho, P; Penha-Lopes, G; Branquinho, C, Artificial lakes as a climate change adaptation strategy in drylands: evaluating the trade-off on non-target ecosystem services, MITIGATION AND ADAPTATION STRATEGIES FOR GLOBAL CHANGE	Insufficient information on actors/roles
11160337	6216086	FALSE	Bradford, JB; Bell, DM, A window of opportunity for climate-change adaptation: easing tree mortality by reducing forest basal area, FRONTIERS IN ECOLOGY AND THE ENVIRONMENT	Insufficient information about response
11160338	6941156	FALSE	Luh, J; Royster, S; Sebastian, D; Ojomo, E; Bartram, J, Expert assessment of the resilience of drinking water and sanitation systems to climate-related hazards, SCIENCE OF THE TOTAL ENVIRONMENT	Insufficient information about response
11160341	6216091	FALSE	Mihaela, P.; Gabriel, E.; Daniela, P.; Camelia, S., Collecting rainwater, a sustainable solution to climate change?, Int. Multidisciplinary Sci. Geoconf. Surveying Geology Mining Ecology Manage., SGEM	Insufficient information about response
11160342	6216092	FALSE	Bola, G; Mabiza, C; Goldin, J; Kujinga, K; Nhapi, I; Makurira, H; Mashauri, D, Coping with droughts and floods: A Case study of Kanyemba, Mbire District, Zimbabwe, PHYSICS AND CHEMISTRY OF THE EARTH	Insufficient information about response
11160344	6216094	FALSE	Breteau-Amores, S; Brunette, M; Davi, H, An Economic Comparison of Adaptation Strategies Towards a Drought-induced Risk of Forest Decline, ECOLOGICAL ECONOMICS	Non-primary/empirical research
11160352	6941158	FALSE	Miao, Q, Are We Adapting to Floods? Evidence from Global Flooding Fatalities, RISK ANALYSIS	Insufficient information about response
11160366	6216096	FALSE	Adams, M., Flood-risk mapping for strategic planning, incident management and the future, Bull. Soc. Cartogr.	Insufficient information about response
11160368	6713553	FALSE	Sinare, H; Gordon, LJ, Ecosystem services from woody vegetation on agricultural lands in Sudano-Sahelian West Africa, AGRICULTURE ECOSYSTEMS & ENVIRONMENT	Insufficient information about response
11160400	6715029	FALSE	Bhandari, K; Cooper, C; Ruhanen, L, Climate change knowledge and organizational adaptation: a destination management organization case study, TOURISM RECREATION RESEARCH	Insufficient information about response
11160422	6941189	FALSE	Chi, FA; Borys, I; Jin, L; Zhu, ZZ; Bart, D, The strategies and effectiveness of climate adaptation for the thousand pillars dwelling based on passive elements and passive spaces, ENERGY AND BUILDINGS	Insufficient information about response
11160426	6713569	FALSE	TrÃƒÂ¦rup, S., Coping with rainfall variability in northern Tanzania, New Trends in Environ. Sci.	Insufficient information about response
11160432	6713600	FALSE	Sow, P; Adaawen, SA; Scheffran, J, Migration, Social Demands and Environmental Change amongst the Frafra of Northern Ghana and the Biali in Northern Benin, SUSTAINABILITY	Insufficient information about response
11160452	6715061	FALSE	Klock, C; Nunn, PD, Adaptation to Climate Change in Small Island Developing States: A Systematic Literature Review of Academic Research, JOURNAL OF ENVIRONMENT & DEVELOPMENT	Non-primary/empirical research
11160453	6715063	FALSE	Betzold, C, Adapting to climate change in small island developing states, CLIMATIC CHANGE	Non-primary/empirical research
11160456	6941196	FALSE	Hendel, M; Royon, L, The effect of pavement-watering on subsurface pavement temperatures, URBAN CLIMATE	Insufficient information on actors/roles
11160457	6941198	FALSE	Straka, M; Sodoudi, S, Evaluating climate change adaptation strategies and scenarios of enhanced vertical and horizontal compactness at urban scale (a case study for Berlin), LANDSCAPE AND URBAN PLANNING	Insufficient information about response
11160462	6941204	FALSE	Shearer, H.; Dodson, J.; Coiacetto, E.; Taygfeld, P., Capacities of private developers in urban climate change adaptation, Appl. Stud. in Clim. Adapt.	Unsupported publication type
11160465	6941208	FALSE	Ãƒâ€¡inar, H.S.; Parlak, N.N.; Yildiz DÃƒÂ¶nmez, N., Climate friendly urban green areas: Roadside green spaces in Sakarya/Turkey,	Insufficient information about response
11160470	6714427	FALSE	Groenewald, SF; Niehof, A, SOCIAL LIMITATIONS OF MAIZE FARMERS' ADAPTATION TO NEOLIBERAL POLICY REFORM IN MEXICO, LATIN AMERICAN RESEARCH REVIEW	Insufficient information about response
11160482	6715078	FALSE	Quinn, T; Bousquet, F; Guerbois, C; Heider, L; Brown, K, How local water and waterbody meanings shape flood risk perception and risk management preferences, SUSTAINABILITY SCIENCE	Insufficient information about response
11160494	6715093	FALSE	Shale, MT, Can burial societies be used to overcome flooding? Insurance and resilience in poor, urban South Africa, CLIMATE AND DEVELOPMENT	Insufficient information about response
11160503	6714443	FALSE	Bagagnan, AR; Ouedraogo, I; Fonta, WM; Sowe, M; Wallis, A, Can Protection Motivation Theory Explain Farmers' Adaptation to Climate Change Decision Making in The Gambia?, CLIMATE	Insufficient information about response
11160507	6713607	FALSE	Ford, JD; Berrang-Ford, L; Bunce, A; McKay, C; Irwin, M; Pearce, T, The status of climate change adaptation in Africa and Asia, REGIONAL ENVIRONMENTAL CHANGE	Non-primary/empirical research
11160513	6713614	FALSE	Ziervogel, G.; Pasquini, L.; Lee, J., Understanding the role of networks in stimulating adaptation actions on the ground: Examples from two African case studies, Univ. Initiat. in Clim. Chang. Mitig. and Adapt.	Insufficient information about response
11160522	6941215	FALSE	Patel, SK; Mathew, B; Nanda, A; Pati, S; Nayak, H, A review on extreme weather events and livelihood in Odisha, India, MAUSAM	Non-primary/empirical research
11160525	6941218	FALSE	Martin, S, Indigenous social and economic adaptations in northern Alaska as measures of resilience, ECOLOGY AND SOCIETY	Insufficient information about response
11160573	6713645	FALSE	Lethoko, MX, Inclusion of climate change strategies in municipal Integrated Development Plans: A case from seven municipalities in Limpopo Province, South Africa, JAMBA-JOURNAL OF DISASTER RISK STUDIES	Insufficient information about response
11160598	6713669	FALSE	Gautier, D; Denis, D; Locatelli, B, Impacts of drought and responses of rural populations in West Africa: a systematic review, WILEY INTERDISCIPLINARY REVIEWS-CLIMATE CHANGE	Non-primary/empirical research
11160627	6715134	FALSE	Singh, C; Osbahr, H; Dorward, P, The implications of rural perceptions of water scarcity on differential adaptation behaviour in Rajasthan, India, REGIONAL ENVIRONMENTAL CHANGE	Insufficient information about response
11160636	6713700	FALSE	Epule, TE; Ford, JD; Lwasa, S; Lepage, L, Climate change adaptation in the Sahel, ENVIRONMENTAL SCIENCE & POLICY	Non-primary/empirical research
11160661	6941250	FALSE	Yusa, A; Berry, P; Cheng, JJ; Ogden, N; Bonsal, B; Stewart, R; Waldick, R, Climate Change, Drought and Human Health in Canada, INTERNATIONAL JOURNAL OF ENVIRONMENTAL RESEARCH AND PUBLIC HEALTH	Non-primary/empirical research
11160668	6941255	FALSE	Wang, Q.; Taylor, J.E., Resilience of Human Mobility under the Influence of Typhoons, Procedia Eng.	Insufficient information about response
11160674	6715166	FALSE	Miller, DD; Ota, Y; Sumaila, UR; Cisneros-Montemayor, AM; Cheung, WWL, Adaptation strategies to climate change in marine systems, GLOBAL CHANGE BIOLOGY	Non-primary/empirical research
11160687	6715169	FALSE	McElduff, L; Ritchie, H, Fostering coastal community resilience: Mobilising people-place relationships, AREA	Insufficient information about response
11160688	6715171	FALSE	Leitch, AM; Palutikof, JP; Rissik, D; Boulter, SL; Tonmoy, FN; Webb, S; Vidaurre, ACP; Campbell, MC, Co-development of a climate change decision support framework through engagement with stakeholders, CLIMATIC CHANGE	Insufficient information about response
11160693	6715183	FALSE	Kipp, A; Cunsolo, A; Vodden, K; King, N; Manners, S; Harper, SL, Climate change impacts on health and wellbeing in rural and remote regions across Canada: a synthesis of the literature, HEALTH PROMOTION AND CHRONIC DISEASE PREVENTION IN CANADA-RESEARCH POLICY AND PRACTICE	Non-primary/empirical research
11160709	6941267	FALSE	MacDonald, JP; Willox, AC; Ford, JD; Shiwak, I; Wood, M, Protective factors for mental health and well-being in a changing climate: Perspectives from Inuit youth in Nunatsiavut, Labrador, SOCIAL SCIENCE & MEDICINE	Insufficient information about response
11160716	6713756	FALSE	Wu, C.-R.; Jen, Y.-T.; Lin, E.-T.; Wei, Y.-H.; Lee, S.-C., A GIS-based tool for initiating climate change adaptation strategies for Taiwan's highway and railway systems,	Unsupported publication type
11160730	6715193	FALSE	Abu, R; Reed, MG, Adaptation through bricolage: Indigenous responses to long-term social-ecological change in the Saskatchewan River Delta, Canada, CANADIAN GEOGRAPHER-GEOGRAPHE CANADIEN	Insufficient information about response
11160751	6941290	FALSE	Chersich, MF; Wright, CY, Climate change adaptation in South Africa: a case study on the role of the health sector, GLOBALIZATION AND HEALTH	Non-primary/empirical research
11160757	6715206	FALSE	Groulx, M; Lewis, J; Lemieux, C; Dawson, J, Place-based climate change adaptation: A critical case study of climate change messaging and collective action in Churchill, Manitoba, LANDSCAPE AND URBAN PLANNING	Insufficient information about response
11160763	6715215	FALSE	Whitney, C.K.; Ban, N.C., Barriers and opportunities for social-ecological adaptation to climate change in coastal British Columbia,	Insufficient information about response
11160771	6713787	FALSE	Ensor, JE; Wennstrom, P; Bhatterai, A; Nightingale, AJ; Eriksen, S; Sillmann, J, Asking the right questions in adaptation research and practice: Seeing beyond climate impacts in rural Nepal, ENVIRONMENTAL SCIENCE & POLICY	Insufficient information about response
11160773	6713791	FALSE	Arulrajah, A; Narsilio, G; Kodikara, J; Orense, RP, Key issues in environmental geotechnics: Australia-New Zealand, ENVIRONMENTAL GEOTECHNICS	Insufficient information about response
11160785	6714550	FALSE	Hassan, I.H.; Othman, W.J., Seaweed (Mwani) farming as anÃƒÂ¢Ã‚Â adaptation strategy to impacts of climate change and variability in Zanzibar, Springer Clim.	Unsupported publication type
11160793	7850917	FALSE	Ardalan, Ali; Belay, Gosaye Degu; Assen, Mohammed; Hosseinzadeh-Attar, Mohammad Javad; Khoei, Effat Merghati; Ostadtaghizadeh, Abbas, Impact of climate change on community health and resilience in Ethiopia: A review article.,	Non-primary/empirical research
11160798	6713810	FALSE	Lo, AY; Xu, BX; Chan, FKS; Su, RX, Social capital and community preparation for urban flooding in China, APPLIED GEOGRAPHY	Insufficient information about response
11160810	6715231	FALSE	Ford, JD; King, D, Coverage and framing of climate change adaptation in the media: A review of influential North American newspapers during 1993-2013, ENVIRONMENTAL SCIENCE & POLICY	Insufficient information about response
11160817	6715243	FALSE	Karamouz, M.; Taheri, M.; Khalili, P.; Chen, X., Building infrastructure resilience in coastal flood risk management, J. Water Resour. Plann. Manage.	Non-primary/empirical research
11160835	6713857	FALSE	Ung, M; Luginaah, I; Chuenpagdee, R; Campbell, G, Perceived Self-Efficacy and Adaptation to Climate Change in Coastal Cambodia, CLIMATE	Non-primary/empirical research
11160844	7850926	FALSE	Morrison, C; Pickering, C, Limits to Climate Change Adaptation: Case Study of the Australian Alps, GEOGRAPHICAL RESEARCH	Insufficient information on actors/roles
11160846	6714573	FALSE	Quandt, A; Kimathi, YA, Perceptions of the effects of floods and droughts on livelihoods: lessons from arid Kenya, INTERNATIONAL JOURNAL OF CLIMATE CHANGE STRATEGIES AND MANAGEMENT	Insufficient information about response
11160850	6714575	FALSE	Lasco, RD; Delfino, RJP; Catacutan, DC; Simelton, ES; Wilson, DM, Climate risk adaptation by smallholder farmers: the roles of trees and agroforestry, CURRENT OPINION IN ENVIRONMENTAL SUSTAINABILITY	Insufficient information about response
11160858	6715247	FALSE	Kipp, Amy; Cunsolo, Ashlee; Vodden, Kelly; King, Nia; Manners, Sean; Harper, Sherilee L, At-a-glance - Climate change impacts on health and wellbeing in rural and remote regions across Canada: a synthesis of the literature.,	Non-primary/empirical research
11160883	7850944	FALSE	Hatvani-Kovacs, G; Bush, J; Sharifi, E; Boland, J, Policy recommendations to increase urban heat stress resilience, URBAN CLIMATE	Insufficient information about response
11160884	7850946	FALSE	Wu, Jiabing; Huang, Cunrui; Pang, Minghui; Wang, Zhe; Yang, Lianping; FitzGerald, Gerard; Zhong, Shuang, Planned sheltering as an adaptation strategy to climate change: Lessons learned from the severe flooding in Anhui Province of China in 2016., Sci. Total Environ.	Insufficient information about response
11160885	7850947	FALSE	Bahadur, KCK; Seng, R; Fraser, E, Should I stay or should I go? Fishers' ability and willingness to adapt to environmental change in Cambodia's Tonle Sap Lake, FISHERIES MANAGEMENT AND ECOLOGY	Insufficient information about response
11160887	6714594	FALSE	Zulu, LC; Adams, EA; Chikowo, R; Snapp, S, The role of community-based livestock management institutions in the adoption and scaling up of pigeon peas in Malawi, FOOD POLICY	Insufficient information about response
11160892	6714601	FALSE	Kihila, JM, Indigenous coping and adaptation strategies to climate change of local communities in Tanzania: a review, CLIMATE AND DEVELOPMENT	Non-primary/empirical research
11160918	7850953	FALSE	Vahmani, P; Jones, AD, Water conservation benefits of urban heat mitigation, NATURE COMMUNICATIONS	Insufficient information on actors/roles
11160919	7850959	FALSE	Himes-Cornell, A; Hoelting, K, Resilience strategies in the face of short- and long-term change: out-migration and fisheries regulation in Alaskan fishing communities, ECOLOGY AND SOCIETY	Insufficient information about response
11160938	6714607	FALSE	Clay, N; King, B, Smallholders' uneven capacities to adapt to climate change amid Africa's 'green revolution': Case study of Rwanda's crop intensification program, WORLD DEVELOPMENT	Insufficient information about response
11160950	6713911	FALSE	Bhatta, GD; Aggarwal, PK, Coping with weather adversity and adaptation to climatic variability: a cross-country study of smallholder farmers in South Asia, CLIMATE AND DEVELOPMENT	Insufficient information about response
11160954	6713919	FALSE	Ahmed, I.; Ayeb-Karlsson, S.; van der Geest, K.; Huq, S.; Jordan, J.C., Climate change, environmental stress and loss of livelihoods can push people towards illegal activities: a case study from coastal Bangladesh,	Insufficient information about response
11160956	6715339	FALSE	Tervo-Kankare, K; Hall, CM; Saarinen, J, Christmas Tourists' Perceptions to Climate Change in Rovaniemi, Finland, TOURISM GEOGRAPHIES	Insufficient information about response
11160983	7851023	FALSE	Torssonen, P.; Strandman, H.; Kellomaki, S.; Kilpelainen, A.; Jylha, K.; Asikainen, A.; Peltola, H., Do we need to adapt the choice of main boreal tree species in forest regeneration under the projected climate change?, Forestry	Insufficient information on actors/roles
11160985	7851025	FALSE	Lechuga, V; Carraro, V; Vinegla, B; Carreira, JA; Linares, JC, Managing drought-sensitive forests under global change. Low competition enhances long-term growth and water uptake in Abies pinsapo, FOREST ECOLOGY AND MANAGEMENT	Insufficient information about response
11161035	7851058	FALSE	Baba, K; Tanaka, M, Attitudes of Farmers and Rural Area Residents Toward Climate Change Adaptation Measures: Their Preferences and Determinants of Their Attitudes, CLIMATE	Insufficient information about response
11161041	7851068	FALSE	Volpato, G; Saleh, SML; Di Nardo, A, Ethnoveterinary of Sahrawi pastoralists of Western Sahara: camel diseases and remedies, JOURNAL OF ETHNOBIOLOGY AND ETHNOMEDICINE	Insufficient information about response
11161044	7851071	FALSE	Sievanen, L., How do small-scale fishers adapt to environmental variability? Lessons from Baja California, Sur, Mexico, Marit. Stud.	Insufficient information about response
11161050	7851081	FALSE	Amin, C.; Sukamdi; Rijanta, Modeling (Im) mobility: The decision to stay in disaster prone area amongs fishermen community in Semarang,	Insufficient information about response
11161055	6714660	FALSE	Traore, K.; Sidibe, D.K.; Coulibaly, H.; Bayala, J., Optimizing yield of improved varieties of millet and sorghum under highly variable rainfall conditions using contour ridges in Cinzana, Mali, Agric. Food Secur.	Insufficient information on actors/roles
11161059	6714666	FALSE	Beveridge, L; Whitfield, S; Challinor, A, Crop modelling: towards locally relevant and climate-informed adaptation, CLIMATIC CHANGE	Insufficient information on actors/roles
11161063	6713950	FALSE	Brown, PR; Bridle, KL; Crimp, SJ, Assessing the capacity of Australian broadacre mixed farmers to adapt to climate change: Identifying constraints and opportunities, AGRICULTURAL SYSTEMS	Insufficient information about response
11161078	7851094	FALSE	Koontanakulvong, S; Suthidhummajit, C, THE ROLE OF GROUNDWATER TO MITIGATE THE DROUGHT AND AS AN ADAPTATION TO CLIMATE CHANGE IN THE PHITSANULOK IRRIGATION PROJECT, IN THE NAN BASIN, THAILAND, JURNAL TEKNOLOGI	Insufficient information about response
11161093	7851104	FALSE	Keskitalo, ECH; Bergh, J; Felton, A; Bjorkman, C; Berlin, M; Axelsson, P; Ring, E; Agren, A; Roberge, JM; Klapwijk, MJ; Boberg, J, Adaptation to Climate Change in Swedish Forestry, FORESTS	Non-primary/empirical research
11161095	7851107	FALSE	Amadou, ML; Villamor, GB; Kyei-Baffour, N, Simulating agricultural land-use adaptation decisions to climate change: An empirical agent-based modelling in northern Ghana, AGRICULTURAL SYSTEMS	Non-primary/empirical research
11161115	7851150	FALSE	Deason, G; Seekamp, E; Barbieri, C, Perceived impacts of climate change, coastal development and policy on oyster harvesting in the Southeastern United States, MARINE POLICY	Insufficient information about response
11161146	7851169	FALSE	Dittrich, R; Wreford, A; Topp, CFE; Eory, V; Moran, D, A guide towards climate change adaptation in the livestock sector: adaptation options and the role of robust decision-making tools for their economic appraisal, REGIONAL ENVIRONMENTAL CHANGE	Insufficient information about response
11161160	7851178	FALSE	Bachner, G, Assessing the economy-wide effects of climate change adaptation options of land transport systems in Austria, REGIONAL ENVIRONMENTAL CHANGE	Non-primary/empirical research
11161161	7851181	FALSE	Auffhammer, M; Mansur, ET, Measuring climatic impacts on energy consumption: A review of the empirical literature, ENERGY ECONOMICS	Non-primary/empirical research
11161175	6714088	FALSE	Snelder, M; Calvert, S, Quantifying the impact of adverse weather conditions on road network performance, EUROPEAN JOURNAL OF TRANSPORT AND INFRASTRUCTURE RESEARCH	Insufficient information about response
11161182	6714098	FALSE	Araos, M; Ford, J; Berrang-Ford, L; Biesbroek, R; Moser, S, Climate change adaptation planning for Global South megacities: the case of Dhaka, JOURNAL OF ENVIRONMENTAL POLICY & PLANNING	Non-primary/empirical research
11161187	6714105	FALSE	Stamos, I; Mitsakis, E; Grau, JMS, Roadmaps for Adaptation Measures of Transportation to Climate Change, TRANSPORTATION RESEARCH RECORD	Insufficient information about response
11161207	6714131	FALSE	Masria, A; Iskander, M; Negm, A, Coastal protection measures, case study (Mediterranean zone, Egypt), JOURNAL OF COASTAL CONSERVATION	Insufficient information on actors/roles
11161234	7963652	FALSE	Newell, R.; Dale, A.; Roseland, M., Climate action co-benefits and integrated community planning: Uncovering the synergies and trade-offs, Int. J. Clim. Change, Impacts Responses	Insufficient information on actors/roles
11161242	8520156	FALSE	, Autonomous adaptation to climate change experiences of rural entrepreneurs in Ecuador.pdf,	Insufficient information about response
11161243	8520157	FALSE	Ortega-Reig, M; Garcia-Molla, M; Sanchis-Ibor, C; Pulido-Velazquez, M; Girard, C; Marcos, P; Ruiz-Rodriguez, M; Garcia-Prats, A, Adaptation of agriculture to global change scenarios. Application of participatory methods in the Jucar River basin (Spain), ECONOMIA AGRARIA Y RECURSOS NATURALES	Insufficient information about response
11161245	8535751	FALSE	Shrestha, A.; Roth, D.; Joshi, D., Flows of change: Dynamic water rights and water access in peri-urban Kathmandu, Ecology and Society	Insufficient information about response
n/a	6205485	FALSE	Bedeke, SB; Vanhove, W; Wordofa, MG; Natarajan, K; Van Damme, P, Perception of and response to climate change by maize-dependent smallholders, CLIMATE RESEARCH	Fulltext unavailable
n/a	6205491	FALSE	Oyekale, A.S., Effect of climate change adaptation options on monthly food shortages among smallholder farmers in West Africa, J. Food Agric. Environ.	Fulltext unavailable
n/a	6205523	FALSE	Negra, C.; Vermeulen, S.; Barioni, L.G.; Mamo, T.; Melville, P.; Tadesse, M., Brazil, Ethiopia, and New Zealand lead the way on climate-smart agriculture, Agric. Food Secur.	Fulltext unavailable
n/a	6214223	FALSE	Kajembe, G.C.; Vedeld, P.; Babili, I.H.; Silayo, D.S.; Mosha, D.B., Institutional sustainability in the face of climate change: Empirical insights from irrigation institutions in the iringa rural district, Tanzania, Climate Change and Multi-Dimensional Sustainability in African Agriculture: Climate Change and Sustainability in Agriculture	Fulltext unavailable
n/a	6216054	FALSE	Rogers, D.P.; Kootval, H.; Tsirkunov, V.V., Early warning, resilient infrastructure and risk transfer,	Fulltext unavailable
n/a	6713587	FALSE	Ifeanyi-Obi, CC, Analysis of Climate Change Adaptation Measures Used by Rural Dwellers in the Southeast and Southsouth Zone of Nigeria, IMPLEMENTING CLIMATE CHANGE ADAPTATION IN CITIES AND COMMUNITIES: INTEGRATING STRATEGIES AND EDUCATIONAL APPROACHES	Fulltext unavailable
n/a	6713601	FALSE	Ogunsola, GO; Oyekale, AS, Determinants of smallholder cocoa farmers' adaptation to climate change in Ile-oluji/Okeigbo Local Government Area of Ondo State, Nigeria, ASIA LIFE SCIENCES	Fulltext unavailable
n/a	6713961	FALSE	Yuliati, Y.; Primasari, D.A., Farmers' adaptation to climate change in the Tengger Mountains (case study in Ngadas Village, Poncokusumo District, Malang Regency, East Java, Indonesia),	Fulltext unavailable
n/a	6714096	FALSE	Zinia, NJ; McShane, P, Ecosystem services management: An evaluation of green adaptations for urban development in Dhaka, Bangladesh, LANDSCAPE AND URBAN PLANNING	Fulltext unavailable
n/a	6714132	FALSE	Mhlanga, N., Sand dams: A sustainable solution for water scarce regions, Int. Water Power Dam Constr.	Fulltext unavailable
n/a	6714231	FALSE	Kumar, S; Sidana, BK, Farmers' perceptions and adaptation strategies to climate change in Punjab agriculture, INDIAN JOURNAL OF AGRICULTURAL SCIENCES	Fulltext unavailable
n/a	6714257	FALSE	Doll, JE; Petersen, B; Bode, C, Skeptical but Adapting: What Midwestern Farmers Say about Climate Change, WEATHER CLIMATE AND SOCIETY	Fulltext unavailable
n/a	6714339	FALSE	Zheng, Y; Dallimer, M, What motivates rural households to adapt to climate change?, CLIMATE AND DEVELOPMENT	Fulltext unavailable
n/a	6714343	FALSE	Maya, KA; Sarker, MAR; Gow, J, FACTORS INFLUENCING RICE FARMERS' ADAPTATION STRATEGIES TO CLIMATE CHANGE AND EXTREME WEATHER EVENT IMPACTS IN BANGLADESH, CLIMATE CHANGE ECONOMICS	Fulltext unavailable
n/a	6714382	FALSE	Syomiti, M.; Maranga, E.; Obwoyere, G.; Getachew, G.; Dana, H.; Beatrice, M.; Wamae, D.; Duyu, J., The adaptive and coping strategies of pastoralists to climate change in Baringo, Laikipia and Nyeri counties of Kenya, Livest. Res. Rural Dev.	Fulltext unavailable
n/a	6714383	FALSE	Evangelista, RJP; Cruz, AC; Lasco, RD, Knowledge, Attitude and Practice of Smallholder Farmers Regarding Climate Change and Agroforestry: A Case Study of Farmers in Penablanca, Cagayan, JOURNAL OF ENVIRONMENTAL SCIENCE AND MANAGEMENT	Fulltext unavailable
n/a	6714395	FALSE	Furoc-Paelmo, R; Cosico, RSA; Cabahug, RED; Castillo, AKA; Castillo, ASA; Visco, RG, Farmers' Perception on the Sustainability of as a Climate Change Adaptation Strategy in Agusan Agusan Del Sur and North Cotobato, Philippines, JOURNAL OF ENVIRONMENTAL SCIENCE AND MANAGEMENT	Fulltext unavailable
n/a	6714396	FALSE	Karimi, V; Karami, E; Keshavarz, M, Vulnerability and Adaptation of Livestock Producers to Climate Variability and Change, RANGELAND ECOLOGY & MANAGEMENT	Fulltext unavailable
n/a	6714431	FALSE	Song, CX; Liu, RF; Oxley, L; Ma, HY, The adoption and impact of engineering-type measures to address climate change: evidence from the major grain-producing areas in China, AUSTRALIAN JOURNAL OF AGRICULTURAL AND RESOURCE ECONOMICS	Fulltext unavailable
n/a	6714493	FALSE	Deb, AK; Haque, CE, Multi-dimensional coping and adaptation strategies of small-scale fishing communities of Bangladesh to climate change induced stressors, INTERNATIONAL JOURNAL OF CLIMATE CHANGE STRATEGIES AND MANAGEMENT	Fulltext unavailable
n/a	6714534	FALSE	Peria, AS; Pulhin, JM; Tapia, MA; Predo, CD; Peras, RJJ; Evangelista, RJP; Lasco, RD; Pulhins, FB, Knowledge, Risk Attitudes and Perceptions on Extreme Weather Events of Smallholder Farmers in Ligao City, Albay, Bicol, Philippines, JOURNAL OF ENVIRONMENTAL SCIENCE AND MANAGEMENT	Fulltext unavailable
n/a	6714552	FALSE	Munden-Dixon, K; Tate, K; Cutts, B; Roche, L, An uncertain future: climate resilience of first-generation ranchers, RANGELAND JOURNAL	Fulltext unavailable
n/a	6714560	FALSE	Van Dijk, M.P.; Li, H., Climate change policies and adaptive behavior of farmers in southern China, Res. Econ. Anthropol.	Fulltext unavailable
n/a	6714584	FALSE	Sene, LM, Farm-level adaptation to climate and environmental changes: a triple hurdle model of coping strategies, ECONOMICS BULLETIN	Fulltext unavailable
n/a	6714633	FALSE	Alo, A.O.; Baines, R.; Conway, J.; Cannon, N., The impacts of climate change on agriculture in developing countries: A case study of Oyo state, Nigeria, Int. J. Clim. Change, Impacts Responses	Fulltext unavailable
n/a	6714648	FALSE	Rahmawati, H; Lestari, AMT, Tackling everyday risks through climate adaptive organic farming, DISASTER PREVENTION AND MANAGEMENT	Fulltext unavailable
n/a	6714693	FALSE	Huong, NTL; Bo, YS; Fahad, S, Farmers' perception, awareness and adaptation to climate change: evidence from northwest Vietnam, INTERNATIONAL JOURNAL OF CLIMATE CHANGE STRATEGIES AND MANAGEMENT	Fulltext unavailable
n/a	6714745	FALSE	Sadiq, MA; Kuwornu, JKM; Al-Hassan, RM; Alhassan, SI, Assessing Maize Farmers' Adaptation Strategies to Climate Change and Variability in Ghana, AGRICULTURE-BASEL	Fulltext unavailable
n/a	6714770	FALSE	Salman, A.; Husnain, M.I.; Jan, I.; Ashfaq, M.; Rashid, M.; Shakoor, U., Farmers' adaptation to climate change in Pakistan: Perceptions, options and constraints,	Fulltext unavailable
n/a	6714780	FALSE	Muchuru, S; Nhamo, G, Climate change and the African livestock sector Emerging adaptation measures from UNFCCC national communications, INTERNATIONAL JOURNAL OF CLIMATE CHANGE STRATEGIES AND MANAGEMENT	Fulltext unavailable
n/a	6714840	FALSE	Nyamwanza, AM; New, M, Anticipatory adaptation and the role of decadal climate information in rural African livelihood systems Lessons from the Mid-Zambezi Valley, Zimbabwe, INTERNATIONAL JOURNAL OF CLIMATE CHANGE STRATEGIES AND MANAGEMENT	Fulltext unavailable
n/a	6714867	FALSE	Koubi, V; Spilker, G; Schaffer, L; Bohmelt, T, The role of environmental perceptions in migration decision-making: evidence from both migrants and non-migrants in five developing countries, POPULATION AND ENVIRONMENT	Fulltext unavailable
n/a	6715082	FALSE	Duzi, B; Vikhrov, D; Stojanov, R; Kelman, I; Juricka, D, Household Coping with and Adapting to River Flood Risk: Case Study of Becva River Basin, REGION IN THE DEVELOPMENT OF SOCIETY 2013	Fulltext unavailable
n/a	6715345	FALSE	Kaluarachchi, Y., The awareness of two stakeholders and the resilience of their built assets to extreme weather events in England, Int. J. Disaster Resilience Built Environ.	Fulltext unavailable
n/a	6715356	FALSE	Reckien, D., Identifying most feasible adaptation options to heatwaves and heavy rain events in New York City, IEEE Int. Conf. Fuzzy Syst., FUZZ-IEEE	Fulltext unavailable
n/a	6715373	FALSE	Wodon, Q., Focus of the study and data, Clim. Change Adapt. and Soc. Resil. in the Sundarbans	Fulltext unavailable
n/a	6941032	FALSE	Sarkar, UK; Roy, K; Karnatak, G; Nandy, SK, Adaptive climate change resilient indigenous fisheries strategies in the floodplain wetlands of West Bengal, India, JOURNAL OF WATER AND CLIMATE CHANGE	Fulltext unavailable
n/a	6941118	FALSE	Nalau, J; Becken, S; Schliephack, J; Parsons, M; Brown, C; Mackey, B, The Role of Indigenous and Traditional Knowledge in Ecosystem-Based Adaptation: A Review of the Literature and Case Studies from the Pacific Islands, WEATHER CLIMATE AND SOCIETY	Fulltext unavailable
n/a	6941227	FALSE	Gomez-Martin, MB; Armesto-Lopez, XA; Cors-Iglesias, M; Munoz-Negrete, J, Adaptation strategies to climate change in the tourist sector: The case of coastal tourism in Spain, TOURISM	Fulltext unavailable
n/a	6941238	FALSE	Mili, B.; Barua, A.; Katyaini, S., Climate change and adaptation through the lens of capability approach: A case study from Darjeeling, Eastern Himalaya, Nat. Resour. Manag.: Concepts, Methodol., Tools, and Appl.	Fulltext unavailable
n/a	6941261	FALSE	Shimamoto, MM; McCormick, S, The Role of Health in Urban Climate Adaptation: An Analysis of Six US Cities, WEATHER CLIMATE AND SOCIETY	Fulltext unavailable
n/a	6941287	FALSE	Ye, S.L.; Qi, X.H.; Chen, Y.; Lin, R.P., A study on the perception of heat waves among urban residents: Based on a survey in Fuzhou, Shengtai Xuebao Acta Ecol. Sin.	Fulltext unavailable
n/a	7850941	FALSE	Rivera-Ferre, MG; Di Masso, M; Vara, I; Cuellar, M; Calle, A; Mailhos, M; Lopez-i-Gelats, F; Bhatta, G; Gallar, D, Local agriculture traditional knowledge to ensure food availability in a changing climate: revisiting water management practices in the Indo-Gangetic Plains, AGROECOLOGY AND SUSTAINABLE FOOD SYSTEMS	Fulltext unavailable
n/a	7850956	FALSE	Armstrong, A; Cromar, J; Dorney, C; Flood, M; Meyer, MD, From Permafrost to Sunny Beaches Lessons Learned from Alaska and Southeast Florida Climate Adaptation Studies, TRANSPORTATION RESEARCH RECORD	Fulltext unavailable
n/a	7851064	FALSE	Karimoune, S.; Sidi Tanko, O.K.; Issiaka, H., Climate variabilities and evolution of soil occupation in the Timia oasis in the Agadez Region, Niger, Geo-Eco-Trop	Fulltext unavailable
n/a	7851087	FALSE	Boko, A.N.N.; Cisse, G.; Kone, B.; Dedy, S.F., Local beliefs and strategies of adaptation to climate change in Korhogo (Ivory Coast), Tropicultura	Fulltext unavailable
n/a	7851177	FALSE	Kang, JE; Yoon, DK; Rhee, J, Factors contributing to business actions in response to climate change in Korea, JOURNAL OF RISK RESEARCH	Fulltext unavailable
n/a	7851193	FALSE	Cradock-Henry, NA; Fountain, J; Buelow, F, Transformations for Resilient Rural Futures: The Case of Kaikura, Aotearoa-New Zealand, SUSTAINABILITY	Fulltext unavailable
n/a	7963646	FALSE	Rowe, AA; Rector, P; Bakacs, M, Survey Results of Green Infrastructure Implementation in New Jersey, JOURNAL OF SUSTAINABLE WATER IN THE BUILT ENVIRONMENT	Fulltext unavailable
n/a	7963648	FALSE	Sterle, K; Hatchett, BJ; Singletary, L; Pohll, G, Hydroclimate Variability in Snow-Fed River Systems: Local Water Managers' Perspectives on Adapting to the New Normal, BULLETIN OF THE AMERICAN METEOROLOGICAL SOCIETY	Fulltext unavailable
n/a	7963650	FALSE	Cox, M; Gardner, WC; Fraser, LH, A Survey-Based Assessment of Cattle Producers' Adaptation to Climate Change in British Columbia, Canada, RANGELAND ECOLOGY & MANAGEMENT	Fulltext unavailable
n/a	8520108	FALSE	Schaller, S.; Jean-Baptiste, N.; Lehmann, P., Opportunities and barriers for urban adaptation to climate change in Latin America. Cases of Mexico City, Lima and Santiago de Chile , Eure	Fulltext unavailable
n/a	8520122	FALSE	Surendran, A.; Balaji, S.J.; Periasami, N.; Senthil Kumar, S.; Durga, A.R., Farmers adaption strategies in the climate vulnerable agro-climatic zones of Tamil Nadu, India, Indian Journal of Ecology	Fulltext unavailable
n/a	8520124	FALSE	Li, X.; Yang, Y.; Liu, Y.; Liu, H., Effect of governmental regulation on farmers' response behavior of drought resistance: An empirical study of North China Plain, Dili Xuebao/Acta Geographica Sinica	Fulltext unavailable
n/a	8520125	FALSE	Akaba, S.; Akuamoah-Boateng, S., An Evaluation of Climate Change Effects on Fishermen and Adaption Strategies in Central Region, Ghana, Climate Change Management	Fulltext unavailable
n/a	8520126	FALSE	Wang, Y.R.; Zhao, X.Y.; Zhang, Q.; Luo, L.; Xue, B., The evaluation of famers' climate change adaptation strategies in high-frigid ecological vulnerable region: A case of Gannan plateau, Shengtai Xuebao/ Acta Ecologica Sinica	Fulltext unavailable
n/a	8520159	FALSE	, PercepcÃŒÂ§aÃŒÆ’o de atores sociais de ItajaiÃŒÂ (SC) a respeito das variacÃŒÂ§oÃŒÆ’es climaÃŒÂticas, com foco nas inundacÃŒÂ§oÃŒÆ’es.pdf,	Fulltext unavailable
n/a	8520160	FALSE	Wu, X.Y.; Liu, G.Q.; Qi, X.; Pan, D.L.; Qi, X.H., Ecological effects of climate change and livelihood adaptations in typical fishing areas: Perceptions of fishermen's households, Shengtai Xuebao/ Acta Ecologica Sinica	Fulltext unavailable
n/a	8529858	FALSE	Gonzalez Martinez, SL; Silva Garcia, JT; Avila Melendez, LA; Moncayo-Estrada, R; Cruz Cardenas, G; Ceja Torres, LF, The phenomenon of climate change on the perception of Purpecha indigenous community of the municipality of Chilchota, Michoacan, Mexico , Revista Internacional de Contaminacion Ambiental	Fulltext unavailable
